# Supplementary material for: Population structure and adaptability analysis of Schizothorax o’connori based on whole-genome resequencing
Source: PubMed Central journal article supplement (PMC10845765; doi:10.1186/s12864-024-09975-9), 2024-02-06
Supplement: 12864_2024_9975_MOESM1_ESM.pdf [file 12864_2024_9975_MOESM1_ESM.pdf]

Supplementary Table 1. Statistical table of quality control results

| Sample_name | Total_raw_read | Total_clean_read | Total_clean_base | Clean_read_q20 | Clean_read_q30 | Clean_read_ratio |
|-------------|----------------|------------------|------------------|----------------|----------------|------------------|
| SO-bomi-1   | 96.03          | 96.03            | 14.33            | 96.91          | 89.89          | 100              |
| SO-bomi-2   | 101            | 101              | 15.09            | 97.8           | 92.6           | 100              |
| SO-bomi-3   | 110.48         | 110.48           | 16.51            | 97.49          | 91.92          | 100              |
| SO-bomi-4   | 130.14         | 130.14           | 19.45            | 97.5           | 92.06          | 100              |
| SO-bomi-5   | 94.81          | 94.81            | 14.16            | 97.83          | 92.78          | 100              |
| SO-bomi-6   | 120.33         | 120.33           | 17.98            | 97.82          | 92.82          | 100              |
| SO-bomi-7   | 98.25          | 98.25            | 14.68            | 97.44          | 91.74          | 100              |
| SO-bomi-8   | 94.04          | 94.04            | 14.05            | 97.64          | 92.1           | 100              |
| SO-bomi-9   | 91.84          | 91.84            | 13.72            | 97.78          | 92.65          | 100              |
| SO-dagu-1   | 99.06          | 99.06            | 14.81            | 97.05          | 90.18          | 100              |
| SO-dagu-2   | 99.04          | 99.04            | 14.8             | 97.21          | 90.55          | 100              |
| SO-dagu-3   | 101.32         | 101.32           | 15.14            | 97.16          | 90.65          | 100              |
| SO-dagu-4   | 107.76         | 107.76           | 16.1             | 97.31          | 91.05          | 100              |
| SO-dagu-5   | 97.49          | 97.49            | 14.57            | 97.01          | 90.02          | 100              |
| SO-dagu-6   | 96.04          | 96.04            | 14.35            | 97.42          | 91.25          | 100              |
| SO-dagu-7   | 104.85         | 104.84           | 15.67            | 97.64          | 92             | 99.99            |
| SO-dagu-8   | 104.5          | 104.49           | 15.62            | 97.67          | 92.09          | 99.99            |
| SO-dagu-9   | 105.57         | 105.57           | 15.78            | 97.53          | 91.46          | 100              |
| SO-jiacha-1 | 106.19         | 106.19           | 15.87            | 97.15          | 90.61          | 100              |
| SO-jiacha-2 | 96.22          | 96.22            | 14.38            | 97.02          | 90.03          | 100              |
| SO-jiacha-3 | 100.44         | 100.44           | 15.01            | 97.37          | 91.11          | 100              |
| SO-jiacha-4 | 93.11          | 93.11            | 13.92            | 97.4           | 91.17          | 100              |
| SO-jiacha-5 | 105.78         | 105.78           | 15.82            | 97.5           | 91.57          | 100              |
| SO-jiacha-6 | 99.74          | 99.73            | 14.91            | 97.53          | 91.7           | 99.99            |
| SO-jiacha-7 | 102.01         | 102.01           | 15.24            | 97.02          | 90.12          | 100              |
| SO-jiacha-8 | 97.11          | 97.11            | 14.52            | 96.97          | 89.86          | 100              |
| SO-jiacha-9 | 95.97          | 95.97            | 14.34            | 97.51          | 91.46          | 100              |
| SO-zangmu-1 | 102.58         | 102.58           | 15.33            | 97.14          | 90.31          | 100              |
| SO-zangmu-2 | 110.44         | 110.42           | 16.5             | 97.4           | 91.26          | 99.99            |
| SO-zangmu-3 | 107.32         | 107.32           | 16.04            | 97.04          | 90.16          | 100              |
| SO-zangmu-4 | 112.1          | 112.09           | 16.76            | 97.67          | 92.13          | 99.99            |
| SO-zangmu-5 | 108.38         | 108.38           | 16.2             | 97.16          | 90.75          | 100              |
| SO-zangmu-6 | 109.53         | 109.53           | 16.37            | 97.07          | 90.3           | 100              |
| SO-zangmu-7 | 107.29         | 107.29           | 16.04            | 97.28          | 90.78          | 100              |
| SO-zangmu-8 | 102.33         | 102.33           | 15.3             | 97.32          | 91.13          | 100              |

|             |        |        |       |       |       |       |
|-------------|--------|--------|-------|-------|-------|-------|
| SO-zangmu-9 | 99.61  | 99.61  | 14.89 | 97.41 | 91.18 | 100   |
| SO-zangga-1 | 101.45 | 101.45 | 15.16 | 97.43 | 91.23 | 100   |
| SO-zangga-2 | 107.11 | 107.11 | 16.01 | 97.21 | 90.5  | 100   |
| SO-zangga-3 | 102.7  | 102.7  | 15.35 | 97.45 | 91.15 | 100   |
| SO-zangga-4 | 108.3  | 108.3  | 16.19 | 97.35 | 91.05 | 100   |
| SO-zangga-5 | 112.58 | 112.58 | 16.85 | 97.91 | 93.17 | 100   |
| SO-zangga-6 | 99.54  | 99.54  | 14.9  | 97.89 | 93.03 | 100   |
| SO-zangga-7 | 96.82  | 96.82  | 14.47 | 97.35 | 91.12 | 100   |
| SO-zangga-8 | 95.54  | 95.54  | 14.28 | 97.18 | 90.6  | 100   |
| SO-zangga-9 | 101.5  | 101.5  | 15.17 | 97.1  | 90.4  | 100   |
| SO-linzhi-1 | 76.7   | 76.7   | 11.46 | 97.87 | 92.76 | 100   |
| SO-linzhi-2 | 76.36  | 76.36  | 11.41 | 97.89 | 92.93 | 100   |
| SO-linzhi-3 | 80.73  | 80.73  | 12.07 | 97.3  | 91.34 | 100   |
| SO-linzhi-4 | 79.97  | 79.97  | 11.95 | 98.01 | 93.43 | 100   |
| SO-mili-1   | 112.11 | 111.99 | 16.78 | 97.22 | 92.11 | 99.89 |
| SO-mili-2   | 108.05 | 107.96 | 16.18 | 97.28 | 92.34 | 99.92 |
| SO-mili-3   | 117.09 | 117.02 | 17.54 | 97.5  | 92.89 | 99.94 |
| SO-mili-4   | 93.22  | 93.14  | 13.96 | 97.1  | 91.9  | 99.91 |
