# Supplementary material for: Population structure and adaptability analysis of Schizothorax o’connori based on whole-genome resequencing
Source: PubMed Central journal article supplement (PMC10845765; doi:10.1186/s12864-024-09975-9), 2024-02-06
Supplement: 12864_2024_9975_MOESM2_ESM.pdf [file 12864_2024_9975_MOESM2_ESM.pdf]

Supplementary Table 2. GO terms of loci under selection among each comparison population of Schizothorax o'connori

| Populations      | ID         | Description                                                      | GeneRatio | BgRatio   | p-value     | GeneID                       |
|------------------|------------|------------------------------------------------------------------|-----------|-----------|-------------|------------------------------|
| bomi vs zangmu   | GO:0007169 | transmembrane receptor protein tyrosine kinase signaling pathway | 1/3       | 11/15848  | 0.002080968 | Soc_3G0009700                |
| bomi vs zangmu   | GO:0004714 | transmembrane receptor protein tyrosine kinase activity          | 1/3       | 12/15848  | 0.002270004 | Soc_3G0009700                |
| bomi vs dagu     | GO:0005044 | scavenger receptor activity                                      | 1/1       | 66/15848  | 0.004164563 | Soc_2G0002500                |
| dagu vs jiacha   | GO:0016887 | ATPase activity                                                  | 1/1       | 71/15848  | 0.004480061 | Soc_1G0008210                |
| dagu vs milin    | GO:0050839 | cell adhesion molecule binding                                   | 1/10      | 10/15848  | 0.00629384  | Soc_7G0008770                |
| jiacha vs linzhi | GO:0036459 | thiol-dependent ubiquitin-specific protease activity             | 1/2       | 52/15848  | 0.006551783 | Soc_20G0008160               |
| dagu vs jiacha   | GO:0004842 | ubiquitin-protein transferase activity                           | 1/1       | 105/15848 | 0.006625442 | Soc_1G0008210                |
| jiacha vs milin  | GO:0004984 | olfactory receptor activity                                      | 1/2       | 53/15848  | 0.006677567 | Soc_16G0006340               |
| dagu vs milin    | GO:0046982 | protein heterodimerization activity                              | 1/10      | 12/15848  | 0.007548321 | Soc_7G0008770                |
| jiacha vs linzhi | GO:0016579 | protein deubiquitination                                         | 1/2       | 63/15848  | 0.007934977 | Soc_20G0008160               |
| dagu vs milin    | GO:0005911 | cell-cell junction                                               | 1/10      | 13/15848  | 0.008175027 | Soc_7G0008770                |
| zangmu vs milin  | GO:0004984 | olfactory receptor activity                                      | 1/3       | 53/15848  | 0.009999926 | Soc_16G0006340               |
| zangag vs milin  | GO:0004984 | olfactory receptor activity                                      | 1/3       | 53/15848  | 0.009999926 | Soc_16G0006340               |
| dagu vs milin    | GO:0042803 | protein homodimerization activity                                | 1/10      | 16/15848  | 0.010053009 | Soc_7G0008770                |
| zangag vs milin  | GO:0004842 | ubiquitin-protein transferase activity                           | 2/24      | 105/15848 | 0.010912788 | Soc_1G0003540/Soc_14G0000800 |
| zangga vs linzhi | GO:0006281 | DNA repair                                                       | 1/2       | 88/15848  | 0.011075018 | Soc_20G0005860               |
| dagu vs zangga   | GO:0006464 | cellular protein modification process                            | 1/6       | 30/15848  | 0.01130606  | Soc_14G0000320               |
| dagu vs zangga   | GO:0004571 | mannosyl-oligosaccharide 1,2-alpha-mannosidase activity          | 1/21      | 10/15848  | 0.013175868 | Soc_U0000420                 |
| dagu vs zangga   | GO:0070403 | NAD+ binding                                                     | 1/21      | 10/15848  | 0.013175868 | Soc_16G0006050               |
| dagu vs jiacha   | GO:0046872 | metal ion binding                                                | 1/1       | 210/15848 | 0.013250883 | Soc_1G0008210                |
| zangmu vs linzhi | GO:0004984 | olfactory receptor activity                                      | 1/4       | 53/15848  | 0.013311381 | Soc_16G0006340               |
| jiacha vs zangmu | GO:0016887 | ATPase activity                                                  | 1/3       | 71/15848  | 0.013380899 | Soc_1G0008210                |
| bomi vs mili     | GO:0004190 | aspartic-type endopeptidase activity                             | 1/12      | 18/15848  | 0.013549334 | Soc_24G0000080               |
| bomi vs mili     | GO:0006352 | DNA-templated transcription, initiation                          | 1/12      | 20/15848  | 0.015044381 | Soc_20G0000330               |
| milin vs linzhi  | GO:0006352 | DNA-templated transcription, initiation                          | 1/12      | 20/15848  | 0.015044381 | Soc_20G0000330               |
| dagu vs zangga   | GO:0000724 | double-strand break repair via homologous recombination          | 1/21      | 12/15848  | 0.015791125 | Soc_14G0007230               |
| zangmu vs milin  | GO:0006352 | DNA-templated transcription, initiation                          | 1/13      | 20/15848  | 0.016288326 | Soc_20G0000330               |
| jiacha vs zangga | GO:0008233 | peptidase activity                                               | 1/9       | 29/15848  | 0.016353021 | Soc_14G0000500               |
| zangmu vs zangga | GO:0008233 | peptidase activity                                               | 1/9       | 29/15848  | 0.016353021 | Soc_14G0000500               |
| bomi vs linzhi   | GO:0006281 | DNA repair                                                       | 1/3       | 88/15848  | 0.016566965 | Soc_20G0005860               |
| dagu vs linzhi   | GO:0006281 | DNA repair                                                       | 1/3       | 88/15848  | 0.016566965 | Soc_20G0005860               |

|                  |            |                                                                |      |           |             |                               |
|------------------|------------|----------------------------------------------------------------|------|-----------|-------------|-------------------------------|
| jiacha vs zangga | GO:0006464 | cellular protein modification process                          | 1/9  | 30/15848  | 0.016912653 | Soc_14G0000320                |
| zangmu vs zangga | GO:0006464 | cellular protein modification process                          | 1/9  | 30/15848  | 0.016912653 | Soc_14G0000320                |
| bomi vs zangmu   | GO:0004713 | protein tyrosine kinase activity                               | 1/3  | 91/15848  | 0.017128499 | Soc_3G0009700                 |
| bomi vs zangga   | GO:0004842 | ubiquitin-protein transferase activity                         | 1/3  | 105/15848 | 0.019746164 | Soc_14G0000800                |
| jiacha vs zangmu | GO:0004842 | ubiquitin-protein transferase activity                         | 1/3  | 105/15848 | 0.019746164 | Soc_1G0008210                 |
| bomi vs zangga   | GO:0004571 | mannosyl-oligosaccharide<br>1,2-alpha-<br>mannosidase activity | 1/41 | 10/15848  | 0.025578837 | Soc_U0000420                  |
| bomi vs zangga   | GO:0008134 | transcription factor binding                                   | 1/41 | 10/15848  | 0.025578837 | Soc_16G0006880                |
| bomi vs zangga   | GO:0045944 | positive regulation of transcription by RNA<br>polymerase II   | 1/41 | 10/15848  | 0.025578837 | Soc_16G0006720                |
| bomi vs zangga   | GO:0070403 | NAD+ binding                                                   | 1/41 | 10/15848  | 0.025578837 | Soc_16G0006050                |
| jiacha vs zangga | GO:0004867 | serine-type endopeptidase inhibitor activity                   | 1/9  | 46/15848  | 0.025828362 | Soc_14G0000500                |
| zangmu vs zangga | GO:0004867 | serine-type endopeptidase inhibitor activity                   | 1/9  | 46/15848  | 0.025828362 | Soc_14G0000500                |
| jiacha vs milin  | GO:0004984 | olfactory receptor activity                                    | 1/8  | 53/15848  | 0.026448868 | Soc_16G0006340                |
| jiacha vs zangga | GO:0003700 | DNA-binding transcription factor activity                      | 2/9  | 476/15848 | 0.028178035 | Soc_14G0000300/Soc_14G0000540 |
| zangmu vs zangga | GO:0003700 | DNA-binding transcription factor activity                      | 2/9  | 476/15848 | 0.028178035 | Soc_14G0000300/Soc_14G0000540 |
| zangga vs linzhi | GO:0004984 | olfactory receptor activity                                    | 1/9  | 53/15848  | 0.029706331 | Soc_16G0006340                |
| bomi vs zangga   | GO:0004842 | ubiquitin-protein transferase activity                         | 2/41 | 105/15848 | 0.030148443 | Soc_1G0003540/Soc_14G0000800  |
| bomi vs zangga   | GO:0005694 | chromosome                                                     | 1/41 | 12/15848  | 0.030617455 | Soc_16G0007620                |
| bomi vs zangga   | GO:0004222 | metalloendopeptidase activity                                  | 2/41 | 109/15848 | 0.032291534 | Soc_14G0000500/Soc_16G0006860 |
| dagu vs milin    | GO:0004984 | olfactory receptor activity                                    | 1/10 | 53/15848  | 0.032953099 | Soc_16G0006340                |
| jiacha vs zangga | GO:0003707 | steroid hormone receptor activity                              | 1/9  | 61/15848  | 0.034121487 | Soc_14G0000300                |
| jiacha vs zangga | GO:0043401 | steroid hormone mediated signaling pathway                     | 1/9  | 61/15848  | 0.034121487 | Soc_14G0000300                |
| zangmu vs zangga | GO:0003707 | steroid hormone receptor activity                              | 1/9  | 61/15848  | 0.034121487 | Soc_14G0000300                |
| zangmu vs zangga | GO:0043401 | steroid hormone mediated signaling pathway                     | 1/9  | 61/15848  | 0.034121487 | Soc_14G0000300                |
| bomi vs mili     | GO:0042626 | ATPase-coupled transmembrane transporter<br>activity           | 1/12 | 46/15848  | 0.034291906 | Soc_17G0007270                |
| jiacha vs milin  | GO:0016887 | ATPase activity                                                | 1/8  | 71/15848  | 0.035291178 | Soc_1G0008210                 |
| milin vs linzhi  | GO:0005622 | intracellular                                                  | 2/12 | 400/15848 | 0.035482856 | Soc_1G0020680/Soc_1G0021560   |
| bomi vs zangga   | GO:0003712 | transcription coregulator activity                             | 1/41 | 14/15848  | 0.035630651 | Soc_16G0006880                |
| zangmu vs milin  | GO:0042626 | ATPase-coupled transmembrane transporter<br>activity           | 1/13 | 46/15848  | 0.037097069 | Soc_17G0007270                |
| dagu vs zangga   | GO:0008233 | peptidase activity                                             | 1/21 | 29/15848  | 0.03775586  | Soc_14G0000500                |
| jiacha vs zangga | GO:0008233 | peptidase activity                                             | 1/21 | 29/15848  | 0.03775586  | Soc_14G0000500                |

|                  |            |                                              |      |           |             |                |
|------------------|------------|----------------------------------------------|------|-----------|-------------|----------------|
| zangmu vs zangga | GO:0008233 | peptidase activity                           | 1/21 | 29/15848  | 0.03775586  | Soc_14G0000500 |
| bomi vs zangga   | GO:0005813 | centrosome                                   | 1/41 | 15/15848  | 0.038127754 | Soc_16G0007630 |
| dagu vs zangga   | GO:0006464 | cellular protein modification process        | 1/21 | 30/15848  | 0.039033256 | Soc_14G0000320 |
| jiacha vs zangga | GO:0005578 | extracellular matrix                         | 1/21 | 30/15848  | 0.039033256 | Soc_4G0011300  |
| jiacha vs zangga | GO:0006464 | cellular protein modification process        | 1/21 | 30/15848  | 0.039033256 | Soc_14G0000320 |
| zangmu vs zangga | GO:0006464 | cellular protein modification process        | 1/21 | 30/15848  | 0.039033256 | Soc_14G0000320 |
| dagu vs zangga   | GO:0004842 | ubiquitin-protein transferase activity       | 1/6  | 105/15848 | 0.039106058 | Soc_14G0000800 |
| jiacha vs zangmu | GO:0046872 | metal ion binding                            | 1/3  | 210/15848 | 0.039230662 | Soc_1G0008210  |
| bomi vs mili     | GO:0004984 | olfactory receptor activity                  | 1/12 | 53/15848  | 0.03941469  | Soc_16G0006340 |
| milin vs linzhi  | GO:0004984 | olfactory receptor activity                  | 1/12 | 53/15848  | 0.03941469  | Soc_16G0006340 |
| dagu vs zangga   | GO:0071805 | potassium ion transmembrane transport        | 1/21 | 31/15848  | 0.040309037 | Soc_14G0000040 |
| jiacha vs zangga | GO:0071805 | potassium ion transmembrane transport        | 1/21 | 31/15848  | 0.040309037 | Soc_14G0000040 |
| zangmu vs zangga | GO:0071805 | potassium ion transmembrane transport        | 1/21 | 31/15848  | 0.040309037 | Soc_14G0000040 |
| bomi vs zangga   | GO:0008324 | cation transmembrane transporter activity    | 1/41 | 16/15848  | 0.04061855  | Soc_17G0007800 |
| dagu vs zangga   | GO:0005267 | potassium channel activity                   | 1/21 | 32/15848  | 0.041583205 | Soc_14G0000040 |
| jiacha vs zangga | GO:0005267 | potassium channel activity                   | 1/21 | 32/15848  | 0.041583205 | Soc_14G0000040 |
| zangmu vs zangga | GO:0005267 | potassium channel activity                   | 1/21 | 32/15848  | 0.041583205 | Soc_14G0000040 |
| zangmu vs milin  | GO:0004984 | olfactory receptor activity                  | 1/13 | 53/15848  | 0.042629582 | Soc_16G0006340 |
| zangag vs milin  | GO:0008233 | peptidase activity                           | 1/24 | 29/15848  | 0.043035901 | Soc_14G0000500 |
| milin vs linzhi  | GO:0005085 | guanyl-nucleotide exchange factor activity   | 1/12 | 58/15848  | 0.043058558 | Soc_2G0017770  |
| zangag vs milin  | GO:0006464 | cellular protein modification process        | 1/24 | 30/15848  | 0.044487772 | Soc_14G0000320 |
| bomi vs zangga   | GO:0007219 | Notch signaling pathway                      | 1/41 | 18/15848  | 0.045581277 | Soc_16G0006720 |
| zangag vs milin  | GO:0071805 | potassium ion transmembrane transport        | 1/24 | 31/15848  | 0.045937531 | Soc_14G0000040 |
| zangag vs milin  | GO:0005267 | potassium channel activity                   | 1/24 | 32/15848  | 0.047385182 | Soc_14G0000040 |
| zangga vs linzhi | GO:0006281 | DNA repair                                   | 1/9  | 88/15848  | 0.048891101 | Soc_20G0005860 |
| jiacha vs milin  | GO:0004842 | ubiquitin-protein transferase activity       | 1/8  | 105/15848 | 0.051801762 | Soc_1G0008210  |
| bomi vs mili     | GO:0016887 | ATPase activity                              | 1/12 | 71/15848  | 0.052473396 | Soc_17G0007270 |
| dagu vs milin    | GO:0007166 | cell surface receptor signaling pathway      | 1/10 | 86/15848  | 0.052974059 | Soc_4G0002720  |
| zangmu vs milin  | GO:0016887 | ATPase activity                              | 1/13 | 71/15848  | 0.056721589 | Soc_17G0007270 |
| jiacha vs zangga | GO:0004842 | ubiquitin-protein transferase activity       | 1/9  | 105/15848 | 0.058087167 | Soc_14G0000800 |
| zangmu vs zangga | GO:0004842 | ubiquitin-protein transferase activity       | 1/9  | 105/15848 | 0.058087167 | Soc_14G0000800 |
| zangga vs linzhi | GO:0004842 | ubiquitin-protein transferase activity       | 1/9  | 105/15848 | 0.058087167 | Soc_14G0000800 |
| dagu vs zangga   | GO:0004867 | serine-type endopeptidase inhibitor activity | 1/21 | 46/15848  | 0.05925325  | Soc_14G0000500 |
| jiacha vs zangga | GO:0004867 | serine-type endopeptidase inhibitor activity | 1/21 | 46/15848  | 0.05925325  | Soc_14G0000500 |
| zangmu vs zangga | GO:0004867 | serine-type endopeptidase inhibitor activity | 1/21 | 46/15848  | 0.05925325  | Soc_14G0000500 |
| jiacha vs zangga | GO:0004222 | metalloendopeptidase activity                | 1/9  | 109/15848 | 0.060239426 | Soc_14G0000500 |
| zangmu vs zangga | GO:0004222 | metalloendopeptidase activity                | 1/9  | 109/15848 | 0.060239426 | Soc_14G0000500 |
| bomi vs zangga   | GO:0003713 | transcription coactivator activity           | 1/41 | 25/15848  | 0.062754372 | Soc_16G0006720 |

|                  |            |                                              |      |           |             |                |
|------------------|------------|----------------------------------------------|------|-----------|-------------|----------------|
| bomi vs mili     | GO:0007166 | cell surface receptor signaling pathway      | 1/12 | 86/15848  | 0.06323112  | Soc_4G0002720  |
| zangag vs milin  | GO:0004867 | serine-type endopeptidase inhibitor activity | 1/24 | 46/15848  | 0.06743258  | Soc_14G0000500 |
| bomi vs zangga   | GO:0008233 | peptidase activity                           | 1/41 | 29/15848  | 0.072431826 | Soc_14G0000500 |
| bomi vs zangga   | GO:0005578 | extracellular matrix                         | 1/41 | 30/15848  | 0.074835916 | Soc_4G0011300  |
| bomi vs zangga   | GO:0006464 | cellular protein modification process        | 1/41 | 30/15848  | 0.074835916 | Soc_14G0000320 |
| bomi vs zangga   | GO:0071805 | potassium ion transmembrane transport        | 1/41 | 31/15848  | 0.077233926 | Soc_14G0000040 |
| zangag vs milin  | GO:0004984 | olfactory receptor activity                  | 1/24 | 53/15848  | 0.077304036 | Soc_16G0006340 |
| dagu vs zangga   | GO:0003707 | steroid hormone receptor activity            | 1/21 | 61/15848  | 0.077840977 | Soc_14G0000300 |
| dagu vs zangga   | GO:0043401 | steroid hormone mediated signaling pathway   | 1/21 | 61/15848  | 0.077840977 | Soc_14G0000300 |
| jiacha vs zangga | GO:0003707 | steroid hormone receptor activity            | 1/21 | 61/15848  | 0.077840977 | Soc_14G0000300 |
| jiacha vs zangga | GO:0043401 | steroid hormone mediated signaling pathway   | 1/21 | 61/15848  | 0.077840977 | Soc_14G0000300 |
| zangmu vs zangga | GO:0003707 | steroid hormone receptor activity            | 1/21 | 61/15848  | 0.077840977 | Soc_14G0000300 |
| zangmu vs zangga | GO:0043401 | steroid hormone mediated signaling pathway   | 1/21 | 61/15848  | 0.077840977 | Soc_14G0000300 |
| bomi vs zangga   | GO:0005267 | potassium channel activity                   | 1/41 | 32/15848  | 0.079625872 | Soc_14G0000040 |
| zangmu vs milin  | GO:0004842 | ubiquitin-protein transferase activity       | 1/13 | 105/15848 | 0.082818758 | Soc_1G0003540  |
| bomi vs zangga   | GO:0005667 | transcription regulator complex              | 1/41 | 34/15848  | 0.08439163  | Soc_16G0006880 |
| bomi vs zangga   | GO:0003700 | DNA-binding transcription factor activity    | 1/3  | 476/15848 | 0.087432088 | Soc_14G0000540 |
| zangag vs milin  | GO:0003700 | DNA-binding transcription factor activity    | 1/3  | 476/15848 | 0.087432088 | Soc_14G0000540 |
| zangag vs milin  | GO:0003707 | steroid hormone receptor activity            | 1/24 | 61/15848  | 0.088463086 | Soc_14G0000300 |
| zangag vs milin  | GO:0043401 | steroid hormone mediated signaling pathway   | 1/24 | 61/15848  | 0.088463086 | Soc_14G0000300 |
| dagu vs milin    | GO:0007155 | cell adhesion                                | 1/10 | 149/15848 | 0.09016307  | Soc_7G0008770  |
| zangmu vs linzhi | GO:0005622 | intracellular                                | 1/4  | 400/15848 | 0.097209595 | Soc_1G0020680  |
| jiacha vs zangga | GO:0042981 | regulation of apoptotic process              | 1/21 | 77/15848  | 0.097282146 | Soc_1G0023160  |
| bomi vs zangga   | GO:0006812 | cation transport                             | 1/41 | 40/15848  | 0.098544908 | Soc_17G0007800 |
| bomi vs zangga   | GO:0007049 | cell cycle                                   | 1/41 | 40/15848  | 0.098544908 | Soc_16G0006880 |
| bomi vs mili     | GO:0000786 | nucleosome                                   | 1/12 | 137/15848 | 0.098975471 | Soc_20G0000330 |
| milin vs linzhi  | GO:0000786 | nucleosome                                   | 1/12 | 137/15848 | 0.098975471 | Soc_20G0000330 |
| dagu vs milin    | GO:0004888 | transmembrane signaling receptor activity    | 1/10 | 165/15848 | 0.099396107 | Soc_4G0002720  |
| milin vs linzhi  | GO:0007264 | small GTPase mediated signal transduction    | 1/12 | 139/15848 | 0.100351387 | Soc_2G0017770  |
| jiacha vs milin  | GO:0046872 | metal ion binding                            | 1/8  | 210/15848 | 0.101240151 | Soc_1G0008210  |
| bomi vs mili     | GO:0005887 | integral component of plasma membrane        | 1/12 | 141/15848 | 0.101725377 | Soc_17G0007270 |
| jiacha vs zangga | GO:0043565 | sequence-specific DNA binding                | 1/9  | 191/15848 | 0.103408201 | Soc_14G0000300 |
| zangmu vs zangga | GO:0043565 | sequence-specific DNA binding                | 1/9  | 191/15848 | 0.103408201 | Soc_14G0000300 |
| zangmu vs milin  | GO:0000786 | nucleosome                                   | 1/13 | 137/15848 | 0.106770392 | Soc_20G0000330 |
| zangmu vs milin  | GO:0005887 | integral component of plasma membrane        | 1/13 | 141/15848 | 0.109723402 | Soc_17G0007270 |
| dagu vs zangga   | GO:0006281 | DNA repair                                   | 1/21 | 88/15848  | 0.110420836 | Soc_14G0007230 |
| jiacha vs zangga | GO:0006281 | DNA repair                                   | 1/21 | 88/15848  | 0.110420836 | Soc_20G0005860 |
| zangmu vs zangga | GO:0006281 | DNA repair                                   | 1/21 | 88/15848  | 0.110420836 | Soc_20G0005860 |

|                  |            |                                                                                                       |      |           |             |                                              |
|------------------|------------|-------------------------------------------------------------------------------------------------------|------|-----------|-------------|----------------------------------------------|
| bomi vs zangga   | GO:0004867 | serine-type endopeptidase inhibitor activity                                                          | 1/41 | 46/15848  | 0.112484664 | Soc_14G0000500                               |
| dagu vs zangga   | GO:0004713 | protein tyrosine kinase activity                                                                      | 1/21 | 91/15848  | 0.113972384 | Soc_16G0007750                               |
| bomi vs mili     | GO:0004888 | transmembrane signaling receptor activity                                                             | 1/12 | 165/15848 | 0.118063897 | Soc_4G0002720                                |
| bomi vs zangga   | GO:0003700 | DNA-binding transcription factor activity                                                             | 3/41 | 476/15848 | 0.124538828 | Soc_14G0000300/Soc_14G0000540/Soc_16G0006880 |
| zangag vs milin  | GO:0006281 | DNA repair                                                                                            | 1/24 | 88/15848  | 0.12517791  | Soc_20G0005860                               |
| dagu vs zangga   | GO:0003700 | DNA-binding transcription factor activity                                                             | 2/21 | 476/15848 | 0.130089526 | Soc_14G0000300/Soc_14G0000540                |
| jiacha vs zangga | GO:0003700 | DNA-binding transcription factor activity                                                             | 2/21 | 476/15848 | 0.130089526 | Soc_14G0000300/Soc_14G0000540                |
| zangmu vs zangga | GO:0003700 | DNA-binding transcription factor activity                                                             | 2/21 | 476/15848 | 0.130089526 | Soc_14G0000300/Soc_14G0000540                |
| dagu vs zangga   | GO:0004842 | ubiquitin-protein transferase activity                                                                | 1/21 | 105/15848 | 0.130368473 | Soc_14G0000800                               |
| jiacha vs zangga | GO:0004842 | ubiquitin-protein transferase activity                                                                | 1/21 | 105/15848 | 0.130368473 | Soc_14G0000800                               |
| zangmu vs zangga | GO:0004842 | ubiquitin-protein transferase activity                                                                | 1/21 | 105/15848 | 0.130368473 | Soc_14G0000800                               |
| dagu vs zangga   | GO:0004222 | metalloendopeptidase activity                                                                         | 1/21 | 109/15848 | 0.134999735 | Soc_14G0000500                               |
| jiacha vs zangga | GO:0004222 | metalloendopeptidase activity                                                                         | 1/21 | 109/15848 | 0.134999735 | Soc_14G0000500                               |
| zangmu vs zangga | GO:0004222 | metalloendopeptidase activity                                                                         | 1/21 | 109/15848 | 0.134999735 | Soc_14G0000500                               |
| bomi vs zangga   | GO:0005085 | guanyl-nucleotide exchange factor activity                                                            | 1/41 | 58/15848  | 0.139736128 | Soc_16G0007130                               |
| bomi vs zangga   | GO:0003707 | steroid hormone receptor activity                                                                     | 1/41 | 61/15848  | 0.146420397 | Soc_14G0000300                               |
| bomi vs zangga   | GO:0043401 | steroid hormone mediated signaling pathway                                                            | 1/41 | 61/15848  | 0.146420397 | Soc_14G0000300                               |
| zangag vs milin  | GO:0004222 | metalloendopeptidase activity                                                                         | 1/24 | 109/15848 | 0.15274973  | Soc_14G0000500                               |
| zangag vs milin  | GO:0003700 | DNA-binding transcription factor activity                                                             | 2/24 | 476/15848 | 0.161458753 | Soc_14G0000300/Soc_14G0000540                |
| dagu vs zangga   | GO:0003700 | DNA-binding transcription factor activity                                                             | 1/6  | 476/15848 | 0.167234455 | Soc_14G0000540                               |
| bomi vs zangga   | GO:0016705 | oxidoreductase activity, acting on paired donors, with incorporation or reduction of molecular oxygen | 1/41 | 74/15848  | 0.174804722 | Soc_16G0007770                               |
| bomi vs zangga   | GO:0004871 | obsolete signal transducer activity                                                                   | 1/41 | 78/15848  | 0.183351576 | Soc_16G0007220                               |
| jiacha vs milin  | GO:0005622 | intracellular                                                                                         | 1/8  | 400/15848 | 0.184990799 | Soc_1G0021560                                |
| bomi vs zangga   | GO:0006281 | DNA repair                                                                                            | 1/41 | 88/15848  | 0.204342634 | Soc_20G0005860                               |
| bomi vs zangga   | GO:0004713 | protein tyrosine kinase activity                                                                      | 1/41 | 91/15848  | 0.210536647 | Soc_16G0007750                               |
| bomi vs zangga   | GO:0020037 | heme binding                                                                                          | 1/41 | 91/15848  | 0.210536647 | Soc_16G0007770                               |
| bomi vs zangga   | GO:0015074 | DNA integration                                                                                       | 1/41 | 94/15848  | 0.216683609 | Soc_16G0006700                               |
| dagu vs zangga   | GO:0043565 | sequence-specific DNA binding                                                                         | 1/21 | 191/15848 | 0.22492165  | Soc_14G0000300                               |
| jiacha vs zangga | GO:0043565 | sequence-specific DNA binding                                                                         | 1/21 | 191/15848 | 0.22492165  | Soc_14G0000300                               |
| zangmu vs zangga | GO:0043565 | sequence-specific DNA binding                                                                         | 1/21 | 191/15848 | 0.22492165  | Soc_14G0000300                               |
| dagu vs milin    | GO:0005622 | intracellular                                                                                         | 1/10 | 400/15848 | 0.225634424 | Soc_1G0021560                                |

|                  |            |                                           |      |           |             |                               |
|------------------|------------|-------------------------------------------|------|-----------|-------------|-------------------------------|
| zangga vs linzhi | GO:0003700 | DNA-binding transcription factor activity | 1/9  | 476/15848 | 0.240071627 | Soc_14G0000540                |
| dagu vs zangga   | GO:0046872 | metal ion binding                         | 1/21 | 210/15848 | 0.244448061 | Soc_4G0000930                 |
| zangag vs milin  | GO:0043565 | sequence-specific DNA binding             | 1/24 | 191/15848 | 0.252647006 | Soc_14G0000300                |
| bomi vs zangga   | GO:0005506 | iron ion binding                          | 1/41 | 114/15848 | 0.256486389 | Soc_16G0007770                |
| bomi vs mili     | GO:0005622 | intracellular                             | 1/12 | 400/15848 | 0.264256009 | Soc_1G0021560                 |
| bomi vs mili     | GO:0006508 | proteolysis                               | 1/12 | 422/15848 | 0.276735962 | Soc_24G0000080                |
| zangmu vs milin  | GO:0005622 | intracellular                             | 1/13 | 400/15848 | 0.282840095 | Soc_1G0021560                 |
| bomi vs zangga   | GO:0006508 | proteolysis                               | 2/41 | 422/15848 | 0.298415034 | Soc_16G0006860/Soc_16G0007340 |
| bomi vs zangga   | GO:0007264 | small GTPase mediated signal transduction | 1/41 | 139/15848 | 0.303472947 | Soc_16G0007130                |
| bomi vs zangga   | GO:0004252 | serine-type endopeptidase activity        | 1/41 | 143/15848 | 0.310716872 | Soc_16G0007340                |
| bomi vs zangga   | GO:0035556 | intracellular signal transduction         | 1/41 | 170/15848 | 0.35772647  | Soc_16G0007220                |
| bomi vs zangga   | GO:0003824 | catalytic activity                        | 1/41 | 178/15848 | 0.371044096 | Soc_17G0007820                |
| bomi vs zangga   | GO:0043565 | sequence-specific DNA binding             | 1/41 | 191/15848 | 0.392112721 | Soc_14G0000300                |
| zangag vs milin  | GO:0005622 | intracellular                             | 1/24 | 400/15848 | 0.45880831  | Soc_1G0021560                 |
| bomi vs zangga   | GO:0046983 | protein dimerization activity             | 1/41 | 236/15848 | 0.459859163 | Soc_1G0000770                 |
| bomi vs zangga   | GO:0007165 | signal transduction                       | 1/41 | 351/15848 | 0.60125968  | Soc_16G0007220                |
| bomi vs zangga   | GO:0055114 | oxidation-reduction process               | 1/41 | 413/15848 | 0.661766425 | Soc_16G0007770                |
