# Supplementary material for: Population structure and adaptability analysis of Schizothorax o’connori based on whole-genome resequencing
Source: PubMed Central journal article supplement (PMC10845765; doi:10.1186/s12864-024-09975-9), 2024-02-06
Supplement: 12864_2024_9975_MOESM3_ESM.pdf [file 12864_2024_9975_MOESM3_ESM.pdf]

Supplementary Table 3. KEGG pathways of loci under selection among each comparison population of Schizothora

| Population       | ID      | Description                                     | GeneRatio | BgRatio  | pvalue      |
|------------------|---------|-------------------------------------------------|-----------|----------|-------------|
| dagu vs milin    | ko04740 | Olfactory transduction                          | 2/2       | 93/8136  | 0.000129271 |
| zangga vs linzhi | ko05146 | Amoebiasis                                      | 2/4       | 127/8136 | 0.001421078 |
| zangga vs linzhi | ko05226 | Gastric cancer                                  | 2/4       | 206/8136 | 0.003701462 |
| bomi vs zangga   | ko00260 | Glycine, serine and threonine metabolism        | 1/1       | 42/8136  | 0.005162242 |
| dagu vs zangga   | ko00260 | Glycine, serine and threonine metabolism        | 1/1       | 42/8136  | 0.005162242 |
| zangmu vs zangga | ko05146 | Amoebiasis                                      | 2/9       | 127/8136 | 0.008100578 |
| bomi vs zangmu   | ko04913 | Ovarian steroidogenesis                         | 1/1       | 85/8136  | 0.010447394 |
| bomi vs zangmu   | ko04213 | Longevity regulating pathway - multiple species | 1/1       | 91/8136  | 0.011184857 |
| bomi vs linzhi   | ko03460 | Fanconi anemia pathway                          | 1/2       | 46/8136  | 0.011276493 |
| dagu vs linzhi   | ko03460 | Fanconi anemia pathway                          | 1/2       | 46/8136  | 0.011276493 |
| zangga vs linzhi | ko03460 | Fanconi anemia pathway                          | 1/2       | 46/8136  | 0.011276493 |
| jiacha vs milin  | ko04740 | Olfactory transduction                          | 1/1       | 93/8136  | 0.011430678 |
| jiacha vs milin  | ko04740 | Olfactory transduction                          | 1/1       | 93/8136  | 0.011430678 |
| zangmu vs milin  | ko04740 | Olfactory transduction                          | 1/1       | 93/8136  | 0.011430678 |
| zangmu vs linzhi | ko04740 | Olfactory transduction                          | 1/1       | 93/8136  | 0.011430678 |
| zangga vs milin  | ko04740 | Olfactory transduction                          | 1/1       | 93/8136  | 0.011430678 |
| bomi vs zangmu   | ko05214 | Glioma                                          | 1/1       | 100/8136 | 0.012291052 |
| bomi vs zangmu   | ko04730 | Long-term depression                            | 1/1       | 114/8136 | 0.014011799 |
| bomi vs zangmu   | ko05218 | Melanoma                                        | 1/1       | 114/8136 | 0.014011799 |
| bomi vs zangmu   | ko04914 | Progesterone-mediated oocyte maturation         | 1/1       | 116/8136 | 0.01425762  |
| bomi vs zangmu   | ko04211 | Longevity regulating pathway                    | 1/1       | 122/8136 | 0.014995084 |
| bomi vs zangmu   | ko01521 | EGFR tyrosine kinase inhibitor resistance       | 1/1       | 124/8136 | 0.015240905 |
| bomi vs zangmu   | ko05215 | Prostate cancer                                 | 1/1       | 126/8136 | 0.015486726 |
| bomi vs zangmu   | ko01522 | Endocrine resistance                            | 1/1       | 130/8136 | 0.015978368 |
| bomi vs zangmu   | ko04114 | Oocyte meiosis                                  | 1/1       | 134/8136 | 0.01647001  |
| bomi vs zangmu   | ko04520 | Adherens junction                               | 1/1       | 135/8136 | 0.01659292  |
| zangmu vs milin  | ko01523 | Antifolate resistance                           | 1/3       | 46/8136  | 0.016867995 |
| bomi vs zangmu   | ko04066 | HIF-1 signaling pathway                         | 1/1       | 145/8136 | 0.017822026 |
| bomi vs zangmu   | ko04152 | AMPK signaling pathway                          | 1/1       | 152/8136 | 0.018682399 |
| zangmu vs milin  | ko02010 | ABC transporters                                | 1/3       | 54/8136  | 0.019782056 |
| zangmu vs zangga | ko05226 | Gastric cancer                                  | 2/9       | 206/8136 | 0.020427405 |
| bomi vs zangmu   | ko04068 | FoxO signaling pathway                          | 1/1       | 168/8136 | 0.020648968 |
| dagu vs milin    | ko04923 | Regulation of lipolysis in adipocytes           | 1/2       | 90/8136  | 0.022002872 |
| bomi vs mili     | ko01523 | Antifolate resistance                           | 1/4       | 46/8136  | 0.02242856  |
| zangga vs linzhi | ko03460 | Fanconi anemia pathway                          | 1/4       | 46/8136  | 0.02242856  |
| bomi vs zangmu   | ko04140 | Autophagy - animal                              | 1/1       | 189/8136 | 0.023230088 |

|                  |         |                                                          |     |          |             |
|------------------|---------|----------------------------------------------------------|-----|----------|-------------|
| bomi vs zangmu   | ko04550 | Signaling pathways regulating pluripotency of stem cells | 1/1 | 195/8136 | 0.023967552 |
| jiacha vs zangga | ko04550 | Signaling pathways regulating pluripotency of stem cells | 1/1 | 195/8136 | 0.023967552 |
| zangmu vs zangga | ko04550 | Signaling pathways regulating pluripotency of stem cells | 1/1 | 195/8136 | 0.023967552 |
| bomi vs zangmu   | ko04150 | mTOR signaling pathway                                   | 1/1 | 202/8136 | 0.024827925 |
| bomi vs zangmu   | ko05224 | Breast cancer                                            | 1/1 | 209/8136 | 0.025688299 |
| bomi vs mili     | ko02010 | ABC transporters                                         | 1/4 | 54/8136  | 0.026290327 |
| bomi vs zangmu   | ko05225 | Hepatocellular carcinoma                                 | 1/1 | 214/8136 | 0.026302852 |
| dagu vs milin    | ko04730 | Long-term depression                                     | 1/2 | 114/8136 | 0.027828967 |
| dagu vs milin    | ko04970 | Salivary secretion                                       | 1/2 | 114/8136 | 0.027828967 |
| zangmu vs milin  | ko01524 | Platinum drug resistance                                 | 1/3 | 81/8136  | 0.029574491 |
| bomi vs zangmu   | ko05202 | Transcriptional misregulation in cancer                  | 1/1 | 247/8136 | 0.030358899 |
| bomi vs linzhi   | ko05146 | Amoebiasis                                               | 1/2 | 127/8136 | 0.030977501 |
| dagu vs linzhi   | ko05146 | Amoebiasis                                               | 1/2 | 127/8136 | 0.030977501 |
| zangga vs linzhi | ko05146 | Amoebiasis                                               | 1/2 | 127/8136 | 0.030977501 |
| milin vs linzhi  | ko04740 | Olfactory transduction                                   | 1/3 | 93/8136  | 0.033905668 |
| zangmu vs milin  | ko04740 | Olfactory transduction                                   | 1/3 | 93/8136  | 0.033905668 |
| bomi vs zangmu   | ko04510 | Focal adhesion                                           | 1/1 | 276/8136 | 0.033923304 |
| dagu vs milin    | ko04540 | Gap junction                                             | 1/2 | 145/8136 | 0.035328578 |
| dagu vs zangga   | ko00260 | Glycine, serine and threonine metabolism                 | 1/7 | 42/8136  | 0.035593783 |
| jiacha vs zangga | ko00260 | Glycine, serine and threonine metabolism                 | 1/7 | 42/8136  | 0.035593783 |
| zangga vs milin  | ko00260 | Glycine, serine and threonine metabolism                 | 1/7 | 42/8136  | 0.035593783 |
| bomi vs zangmu   | ko05205 | Proteoglycans in cancer                                  | 1/1 | 291/8136 | 0.035766962 |
| dagu vs zangga   | ko04215 | Apoptosis - multiple species                             | 1/7 | 44/8136  | 0.037261276 |
| jiacha vs zangga | ko04215 | Apoptosis - multiple species                             | 1/7 | 44/8136  | 0.037261276 |
| bomi vs zangmu   | ko04014 | Ras signaling pathway                                    | 1/1 | 309/8136 | 0.037979351 |
| jiacha vs zangga | ko03460 | Fanconi anemia pathway                                   | 1/7 | 46/8136  | 0.038926296 |
| zangga vs milin  | ko03460 | Fanconi anemia pathway                                   | 1/7 | 46/8136  | 0.038926296 |
| bomi vs zangmu   | ko04015 | Rap1 signaling pathway                                   | 1/1 | 317/8136 | 0.038962635 |
| bomi vs mili     | ko01524 | Platinum drug resistance                                 | 1/4 | 81/8136  | 0.039239371 |
| bomi vs zangmu   | ko04144 | Endocytosis                                              | 1/1 | 329/8136 | 0.040437561 |
| dagu vs zangga   | ko00513 | Various types of N-glycan biosynthesis                   | 1/7 | 48/8136  | 0.040588848 |
| dagu vs milin    | ko04611 | Platelet activation                                      | 1/2 | 180/8136 | 0.04376098  |
| dagu vs milin    | ko04713 | Circadian entrainment                                    | 1/2 | 182/8136 | 0.044241714 |
| bomi vs mili     | ko04740 | Olfactory transduction                                   | 1/4 | 93/8136  | 0.044952855 |
| zangga vs linzhi | ko04740 | Olfactory transduction                                   | 1/4 | 93/8136  | 0.044952855 |
| zangmu vs zangga | ko00260 | Glycine, serine and threonine metabolism                 | 1/9 | 42/8136  | 0.045534219 |
| zangmu vs zangga | ko04215 | Apoptosis - multiple species                             | 1/9 | 44/8136  | 0.047655778 |
| zangmu vs milin  | ko04976 | Bile secretion                                           | 1/3 | 133/8136 | 0.048249817 |

|                  |         |                                           |      |          |             |
|------------------|---------|-------------------------------------------|------|----------|-------------|
| dagu vs zangga   | ko00510 | N-Glycan biosynthesis                     | 1/7  | 58/8136  | 0.048864679 |
| dagu vs milin    | ko04270 | Vascular smooth muscle contraction        | 1/2  | 203/8136 | 0.049282118 |
| zangmu vs zangga | ko03460 | Fanconi anemia pathway                    | 1/9  | 46/8136  | 0.049773143 |
| bomi vs linzhi   | ko05226 | Gastric cancer                            | 1/2  | 206/8136 | 0.050001088 |
| dagu vs linzhi   | ko05226 | Gastric cancer                            | 1/2  | 206/8136 | 0.050001088 |
| zangga vs linzhi | ko05226 | Gastric cancer                            | 1/2  | 206/8136 | 0.050001088 |
| bomi vs zangmu   | ko04010 | MAPK signaling pathway                    | 1/1  | 431/8136 | 0.052974435 |
| bomi vs zangmu   | ko04151 | PI3K-Akt signaling pathway                | 1/1  | 437/8136 | 0.053711898 |
| dagu vs milin    | ko04714 | Thermogenesis                             | 1/2  | 246/8136 | 0.059561366 |
| dagu vs zangga   | ko04742 | Taste transduction                        | 1/7  | 72/8136  | 0.060348005 |
| jiacha vs zangga | ko04742 | Taste transduction                        | 1/7  | 72/8136  | 0.060348005 |
| zangga vs milin  | ko04742 | Taste transduction                        | 1/7  | 72/8136  | 0.060348005 |
| dagu vs milin    | ko04022 | cGMP-PKG signaling pathway                | 1/2  | 252/8136 | 0.060991237 |
| milin vs linzhi  | ko05322 | Systemic lupus erythematosus              | 1/3  | 174/8136 | 0.062804489 |
| zangmu vs milin  | ko05322 | Systemic lupus erythematosus              | 1/3  | 174/8136 | 0.062804489 |
| bomi vs mili     | ko04976 | Bile secretion                            | 1/4  | 133/8136 | 0.063813911 |
| bomi vs zangga   | ko00260 | Glycine, serine and threonine metabolism  | 1/13 | 42/8136  | 0.065115941 |
| bomi vs zangga   | ko04215 | Apoptosis - multiple species              | 1/13 | 44/8136  | 0.068116801 |
| bomi vs zangga   | ko03460 | Fanconi anemia pathway                    | 1/13 | 46/8136  | 0.071108768 |
| milin vs linzhi  | ko04613 | NA                                        | 1/3  | 202/8136 | 0.07265851  |
| zangmu vs milin  | ko04613 | NA                                        | 1/3  | 202/8136 | 0.07265851  |
| milin vs linzhi  | ko05034 | Alcoholism                                | 1/3  | 205/8136 | 0.073710183 |
| zangmu vs milin  | ko05034 | Alcoholism                                | 1/3  | 205/8136 | 0.073710183 |
| bomi vs zangga   | ko00513 | Various types of N-glycan biosynthesis    | 1/13 | 48/8136  | 0.074091866 |
| zangmu vs zangga | ko04742 | Taste transduction                        | 1/9  | 72/8136  | 0.076920634 |
| zangga vs milin  | ko04740 | Olfactory transduction                    | 1/7  | 93/8136  | 0.077350113 |
| bomi vs mili     | ko05322 | Systemic lupus erythematosus              | 1/4  | 174/8136 | 0.082855149 |
| milin vs linzhi  | ko05202 | Transcriptional misregulation in cancer   | 1/3  | 247/8136 | 0.088350216 |
| zangmu vs milin  | ko05202 | Transcriptional misregulation in cancer   | 1/3  | 247/8136 | 0.088350216 |
| bomi vs zangga   | ko00510 | N-Glycan biosynthesis                     | 1/13 | 58/8136  | 0.088875152 |
| dagu vs zangga   | ko04974 | Protein digestion and absorption          | 1/7  | 112/8136 | 0.092505074 |
| jiacha vs zangga | ko04974 | Protein digestion and absorption          | 1/7  | 112/8136 | 0.092505074 |
| zangga vs milin  | ko04974 | Protein digestion and absorption          | 1/7  | 112/8136 | 0.092505074 |
| bomi vs mili     | ko04613 | NA                                        | 1/4  | 202/8136 | 0.095690968 |
| bomi vs mili     | ko05034 | Alcoholism                                | 1/4  | 205/8136 | 0.097058199 |
| dagu vs zangga   | ko01521 | EGFR tyrosine kinase inhibitor resistance | 1/7  | 124/8136 | 0.101966275 |
| jiacha vs zangga | ko05146 | Amoebiasis                                | 1/7  | 127/8136 | 0.10431832  |
| zangga vs milin  | ko05146 | Amoebiasis                                | 1/7  | 127/8136 | 0.10431832  |

|                  |         |                                                          |      |          |             |
|------------------|---------|----------------------------------------------------------|------|----------|-------------|
| bomi vs zangga   | ko04330 | Notch signaling pathway                                  | 1/13 | 70/8136  | 0.106327405 |
| bomi vs zangga   | ko04742 | Taste transduction                                       | 1/13 | 72/8136  | 0.109205932 |
| milin vs linzhi  | ko04014 | Ras signaling pathway                                    | 1/3  | 309/8136 | 0.109678506 |
| milin vs linzhi  | ko04015 | Rap1 signaling pathway                                   | 1/3  | 317/8136 | 0.112406065 |
| bomi vs mili     | ko05202 | Transcriptional misregulation in cancer                  | 1/4  | 247/8136 | 0.116037108 |
| zangmu vs zangga | ko04974 | Protein digestion and absorption                         | 1/9  | 112/8136 | 0.117340948 |
| dagu vs zangga   | ko04550 | Signaling pathways regulating pluripotency of stem cells | 1/7  | 195/8136 | 0.156233553 |
| jiacha vs zangga | ko04550 | Signaling pathways regulating pluripotency of stem cells | 1/7  | 195/8136 | 0.156233553 |
| zangga vs milin  | ko04550 | Signaling pathways regulating pluripotency of stem cells | 1/7  | 195/8136 | 0.156233553 |
| dagu vs zangga   | ko04141 | Protein processing in endoplasmic reticulum              | 1/7  | 199/8136 | 0.159205306 |
| dagu vs zangga   | ko04210 | Apoptosis                                                | 1/7  | 205/8136 | 0.163646113 |
| jiacha vs zangga | ko04210 | Apoptosis                                                | 1/7  | 205/8136 | 0.163646113 |
| jiacha vs zangga | ko05226 | Gastric cancer                                           | 1/7  | 206/8136 | 0.16438429  |
| zangga vs milin  | ko05226 | Gastric cancer                                           | 1/7  | 206/8136 | 0.16438429  |
| bomi vs zangga   | ko04974 | Protein digestion and absorption                         | 1/13 | 112/8136 | 0.16500944  |
| bomi vs zangga   | ko01521 | EGFR tyrosine kinase inhibitor resistance                | 1/13 | 124/8136 | 0.181110121 |
| bomi vs zangga   | ko04658 | Th1 and Th2 cell differentiation                         | 1/13 | 125/8136 | 0.182438824 |
| bomi vs zangga   | ko05146 | Amoebiasis                                               | 1/13 | 127/8136 | 0.185090262 |
| bomi vs zangga   | ko04110 | Cell cycle                                               | 1/13 | 135/8136 | 0.195616836 |
| zangmu vs zangga | ko04550 | Signaling pathways regulating pluripotency of stem cells | 1/9  | 195/8136 | 0.196231313 |
| zangmu vs zangga | ko04210 | Apoptosis                                                | 1/9  | 205/8136 | 0.205299688 |
| dagu vs zangga   | ko04514 | Cell adhesion molecules                                  | 1/7  | 267/8136 | 0.208370113 |
| jiacha vs zangga | ko04514 | Cell adhesion molecules                                  | 1/7  | 267/8136 | 0.208370113 |
| zangga vs milin  | ko04514 | Cell adhesion molecules                                  | 1/7  | 267/8136 | 0.208370113 |
| bomi vs zangga   | ko04722 | Neurotrophin signaling pathway                           | 1/13 | 160/8136 | 0.227708845 |
| bomi vs zangga   | ko04910 | Insulin signaling pathway                                | 1/13 | 173/8136 | 0.243925596 |
| zangmu vs zangga | ko04514 | Cell adhesion molecules                                  | 1/9  | 267/8136 | 0.259521933 |
| bomi vs zangga   | ko04550 | Signaling pathways regulating pluripotency of stem cells | 1/13 | 195/8136 | 0.270655048 |
| bomi vs zangga   | ko04141 | Protein processing in endoplasmic reticulum              | 1/13 | 199/8136 | 0.275420195 |
| bomi vs zangga   | ko04210 | Apoptosis                                                | 1/13 | 205/8136 | 0.282514056 |
| bomi vs zangga   | ko05226 | Gastric cancer                                           | 1/13 | 206/8136 | 0.283690114 |
| bomi vs zangga   | ko04514 | Cell adhesion molecules                                  | 1/13 | 267/8136 | 0.352155987 |
| bomi vs zangga   | ko05165 | Human papillomavirus infection                           | 1/13 | 417/8136 | 0.495656824 |

< o'connori

| GeneID                        |
|-------------------------------|
| Soc_16G0006340/Soc_19G0002040 |
| Soc_20G0005830/Soc_20G0005900 |
| Soc_20G0005830/Soc_20G0005900 |
| Soc_14G0000910                |
| Soc_14G0000910                |
| Soc_20G0005830/Soc_20G0005900 |
| Soc_3G0009700                 |
| Soc_3G0009700                 |
| Soc_20G0005860                |
| Soc_20G0005860                |
| Soc_20G0005860                |
| Soc_16G0006340                |
| Soc_16G0006340                |
| Soc_16G0006340                |
| Soc_16G0006340                |
| Soc_16G0006340                |
| Soc_3G0009700                 |
| Soc_3G0009700                 |
| Soc_3G0009700                 |
| Soc_3G0009700                 |
| Soc_3G0009700                 |
| Soc_3G0009700                 |
| Soc_3G0009700                 |
| Soc_3G0009700                 |
| Soc_3G0009700                 |
| Soc_3G0009700                 |
| Soc_3G0009700                 |
| Soc_3G0009700                 |
| Soc_17G0007270                |
| Soc_3G0009700                 |
| Soc_3G0009700                 |
| Soc_17G0007270                |
| Soc_20G0005830/Soc_20G0005900 |
| Soc_3G0009700                 |
| Soc_19G0002040                |
| Soc_17G0007270                |
| Soc_20G0005860                |
| Soc_3G0009700                 |

|                |
|----------------|
| Soc_3G0009700  |
| Soc_14G0000300 |
| Soc_14G0000300 |
| Soc_3G0009700  |
| Soc_3G0009700  |
| Soc_17G0007270 |
| Soc_3G0009700  |
| Soc_19G0002040 |
| Soc_19G0002040 |
| Soc_17G0007270 |
| Soc_3G0009700  |
| Soc_20G0005900 |
| Soc_20G0005900 |
| Soc_20G0005900 |
| Soc_16G0006340 |
| Soc_16G0006340 |
| Soc_3G0009700  |
| Soc_19G0002040 |
| Soc_14G0000910 |
| Soc_14G0000910 |
| Soc_14G0000910 |
| Soc_3G0009700  |
| Soc_16G0007700 |
| Soc_16G0007700 |
| Soc_3G0009700  |
| Soc_20G0005860 |
| Soc_20G0005860 |
| Soc_3G0009700  |
| Soc_17G0007270 |
| Soc_3G0009700  |
| Soc_U0000420   |
| Soc_19G0002040 |
| Soc_19G0002040 |
| Soc_16G0006340 |
| Soc_16G0006340 |
| Soc_14G0000910 |
| Soc_16G0007700 |
| Soc_17G0007270 |

|                |
|----------------|
| Soc_U0000420   |
| Soc_19G0002040 |
| Soc_20G0005860 |
| Soc_20G0005900 |
| Soc_20G0005900 |
| Soc_20G0005900 |
| Soc_3G0009700  |
| Soc_3G0009700  |
| Soc_19G0002040 |
| Soc_14G0000040 |
| Soc_14G0000040 |
| Soc_14G0000040 |
| Soc_19G0002040 |
| Soc_20G0000330 |
| Soc_20G0000330 |
| Soc_17G0007270 |
| Soc_14G0000910 |
| Soc_16G0007700 |
| Soc_20G0005860 |
| Soc_20G0000330 |
| Soc_20G0000330 |
| Soc_20G0000330 |
| Soc_20G0000330 |
| Soc_U0000420   |
| Soc_14G0000040 |
| Soc_16G0006340 |
| Soc_20G0000330 |
| Soc_20G0000330 |
| Soc_20G0000330 |
| Soc_U0000420   |
| Soc_14G0000040 |
| Soc_14G0000040 |
| Soc_14G0000040 |
| Soc_20G0000330 |
| Soc_20G0000330 |
| Soc_16G0007750 |
| Soc_20G0005900 |
| Soc_20G0005900 |

|                |
|----------------|
| Soc_16G0006720 |
| Soc_14G0000040 |
| Soc_2G0017770  |
| Soc_2G0017770  |
| Soc_20G0000330 |
| Soc_14G0000040 |
| Soc_14G0000300 |
| Soc_14G0000300 |
| Soc_14G0000300 |
| Soc_U0000420   |
| Soc_16G0007700 |
| Soc_16G0007700 |
| Soc_20G0005900 |
| Soc_20G0005900 |
| Soc_14G0000040 |
| Soc_16G0007750 |
| Soc_16G0006720 |
| Soc_20G0005900 |
| Soc_16G0006880 |
| Soc_14G0000300 |
| Soc_16G0007700 |
| Soc_14G0000750 |
| Soc_14G0000750 |
| Soc_14G0000750 |
| Soc_16G0007220 |
| Soc_16G0007220 |
| Soc_14G0000750 |
| Soc_14G0000300 |
| Soc_U0000420   |
| Soc_16G0007700 |
| Soc_20G0005900 |
| Soc_14G0000750 |
| Soc_16G0006720 |
