# Supplementary material for: Population structure and adaptability analysis of Schizothorax o’connori based on whole-genome resequencing
Source: PubMed Central journal article supplement (PMC10845765; doi:10.1186/s12864-024-09975-9), 2024-02-06
Supplement: 12864_2024_9975_MOESM4_ESM.pdf [file 12864_2024_9975_MOESM4_ESM.pdf]

Supplementary Table 4. GO annotation for XP-EHH analysis

| population    | ID         | Description | GeneRatio | BgRatio   | pvalue   | p.adjust | qvalue   | geneID    | Count |
|---------------|------------|-------------|-----------|-----------|----------|----------|----------|-----------|-------|
| bomi vs milin | GO:0008417 | fucosyltran | 4/468     | 13/15848  | 0.000434 | 0.091612 | 0.087293 | Soc_13G00 | 4     |
| bomi vs milin | GO:0007596 | blood coag  | 4/468     | 16/15848  | 0.00103  | 0.108669 | 0.103546 | Soc_18G00 | 4     |
| bomi vs milin | GO:0004950 | chemokine   | 4/468     | 23/15848  | 0.004256 | 0.299321 | 0.28521  | Soc_15G00 | 4     |
| bomi vs milin | GO:0003924 | GTPase ac   | 18/468    | 314/15848 | 0.005782 | 0.304985 | 0.290607 | Soc_13G00 | 18    |
| bomi vs milin | GO:0005272 | sodium ch   | 3/468     | 15/15848  | 0.008935 | 0.365828 | 0.348581 | Soc_22G00 | 3     |
| bomi vs milin | GO:0005267 | potassium   | 4/468     | 32/15848  | 0.014032 | 0.365828 | 0.348581 | Soc_14G00 | 4     |
| bomi vs milin | GO:0006486 | protein gly | 7/468     | 87/15848  | 0.014397 | 0.365828 | 0.348581 | Soc_10G00 | 7     |
| bomi vs milin | GO:0006281 | DNA repair  | 7/468     | 88/15848  | 0.015257 | 0.365828 | 0.348581 | Soc_14G00 | 7     |
| bomi vs milin | GO:0006935 | chemotaxi   | 4/468     | 33/15848  | 0.015604 | 0.365828 | 0.348581 | Soc_15G00 | 4     |
| bomi vs milin | GO:0004497 | monooxyc    | 3/468     | 19/15848  | 0.017439 | 0.367965 | 0.350618 | Soc_20G00 | 3     |
| bomi vs milin | GO:0005507 | copper ion  | 3/468     | 20/15848  | 0.020076 | 0.372004 | 0.354466 | Soc_21G00 | 3     |
| bomi vs milin | GO:0007605 | sensory pe  | 3/468     | 21/15848  | 0.02292  | 0.372004 | 0.354466 | Soc_3G00  | 3     |
| bomi vs milin | GO:0043087 | regulation  | 3/468     | 21/15848  | 0.02292  | 0.372004 | 0.354466 | Soc_3G00  | 3     |
| bomi vs milin | GO:0030971 | receptor ty | 2/468     | 10/15848  | 0.033471 | 0.481286 | 0.458596 | Soc_15G00 | 2     |
| bomi vs milin | GO:0008081 | phosphori   | 3/468     | 25/15848  | 0.036357 | 0.481286 | 0.458596 | Soc_14G00 | 3     |
| bomi vs milin | GO:0007169 | transmem    | 2/468     | 11/15848  | 0.040122 | 0.481286 | 0.458596 | Soc_11G00 | 2     |
| bomi vs milin | GO:0030414 | peptidase   | 2/468     | 11/15848  | 0.040122 | 0.481286 | 0.458596 | Soc_19G00 | 2     |
| bomi vs milin | GO:0009607 | response t  | 3/468     | 27/15848  | 0.044292 | 0.481286 | 0.458596 | Soc_12G00 | 3     |
| bomi vs milin | GO:0004714 | transmem    | 2/468     | 12/15848  | 0.047224 | 0.481286 | 0.458596 | Soc_11G00 | 2     |
| bomi vs milin | GO:1902476 | chloride tr | 2/468     | 12/15848  | 0.047224 | 0.481286 | 0.458596 | Soc_24G00 | 2     |
| bomi vs milin | GO:0004713 | protein tyr | 6/468     | 91/15848  | 0.052443 | 0.481286 | 0.458596 | Soc_11G00 | 6     |
| bomi vs milin | GO:0004620 | phospholi   | 2/468     | 13/15848  | 0.054743 | 0.481286 | 0.458596 | Soc_5G00  | 2     |
| bomi vs milin | GO:0009395 | phospholi   | 2/468     | 13/15848  | 0.054743 | 0.481286 | 0.458596 | Soc_5G00  | 2     |
| bomi vs milin | GO:0032947 | molecular   | 2/468     | 13/15848  | 0.054743 | 0.481286 | 0.458596 | Soc_13G00 | 2     |
| bomi vs milin | GO:0004725 | protein tyr | 4/468     | 50/15848  | 0.059626 | 0.503243 | 0.479518 | Soc_13G00 | 4     |
| bomi vs milin | GO:0071805 | potassium   | 3/468     | 31/15848  | 0.062489 | 0.507124 | 0.483216 | Soc_14G00 | 3     |
| bomi vs milin | GO:0042157 | lipoprotei  | 3/468     | 32/15848  | 0.067502 | 0.527516 | 0.502647 | Soc_11G00 | 3     |
| bomi vs milin | GO:0016042 | lipid catab | 2/468     | 16/15848  | 0.079507 | 0.599142 | 0.570896 | Soc_13G00 | 2     |
| bomi vs milin | GO:0004879 | nuclear re  | 2/468     | 17/15848  | 0.088404 | 0.621772 | 0.592459 | Soc_20G00 | 2     |
| bomi vs milin | GO:0051536 | iron-sulfur | 2/468     | 17/15848  | 0.088404 | 0.621772 | 0.592459 | Soc_23G00 | 2     |
| bomi vs milin | GO:0003684 | damaged     | 2/468     | 18/15848  | 0.097578 | 0.66416  | 0.632849 | Soc_7G00  | 2     |
| bomi vs milin | GO:0042127 | regulation  | 2/468     | 20/15848  | 0.116665 | 0.753674 | 0.718142 | Soc_10G00 | 2     |
| bomi vs milin | GO:0030170 | pyridoxal   | 3/468     | 41/15848  | 0.119998 | 0.753674 | 0.718142 | Soc_12G00 | 3     |
| bomi vs milin | GO:0005506 | iron ion bi | 6/468     | 114/15848 | 0.121445 | 0.753674 | 0.718142 | Soc_12G00 | 6     |
| bomi vs milin | GO:0005044 | scavenger   | 4/468     | 66/15848  | 0.130599 | 0.787324 | 0.750207 | Soc_21G00 | 4     |
| bomi vs milin | GO:0004129 | cytochrom   | 2/468     | 23/15848  | 0.146814 | 0.796243 | 0.758705 | Soc_5G00  | 2     |

|               |            |              |        |           |          |          |          |           |    |
|---------------|------------|--------------|--------|-----------|----------|----------|----------|-----------|----|
| bomi vs milin | GO:0016459 | myosin co    | 4/468  | 70/15848  | 0.152153 | 0.796243 | 0.758705 | Soc_22G00 | 4  |
| bomi vs milin | GO:0004867 | serine-tyr   | 3/468  | 46/15848  | 0.153988 | 0.796243 | 0.758705 | Soc_14G00 | 3  |
| bomi vs milin | GO:0006470 | protein de   | 6/468  | 123/15848 | 0.156704 | 0.796243 | 0.758705 | Soc_11G00 | 6  |
| bomi vs milin | GO:0003774 | motor acti   | 4/468  | 71/15848  | 0.157741 | 0.796243 | 0.758705 | Soc_22G00 | 4  |
| bomi vs milin | GO:0006869 | lipid trans  | 3/468  | 47/15848  | 0.161118 | 0.796243 | 0.758705 | Soc_11G00 | 3  |
| bomi vs milin | GO:0055114 | oxidation-   | 16/468 | 413/15848 | 0.164064 | 0.796243 | 0.758705 | Soc_11G00 | 16 |
| bomi vs milin | GO:0005923 | bicellular t | 4/468  | 74/15848  | 0.174945 | 0.796243 | 0.758705 | Soc_13G00 | 4  |
| bomi vs milin | GO:0042981 | regulation   | 4/468  | 77/15848  | 0.192755 | 0.796243 | 0.758705 | Soc_11G00 | 4  |
| bomi vs milin | GO:0003950 | NAD+ AD      | 2/468  | 28/15848  | 0.199848 | 0.796243 | 0.758705 | Soc_11G00 | 2  |
| bomi vs milin | GO:0008285 | negative r   | 2/468  | 28/15848  | 0.199848 | 0.796243 | 0.758705 | Soc_11G00 | 2  |
| bomi vs milin | GO:0004984 | olfactory r  | 3/468  | 53/15848  | 0.205761 | 0.796243 | 0.758705 | Soc_16G00 | 3  |
| bomi vs milin | GO:0006814 | sodium ion   | 3/468  | 54/15848  | 0.213462 | 0.796243 | 0.758705 | Soc_22G00 | 3  |
| bomi vs milin | GO:0000226 | microtubu    | 2/468  | 30/15848  | 0.221658 | 0.796243 | 0.758705 | Soc_15G00 | 2  |
| bomi vs milin | GO:0005578 | extracellul  | 2/468  | 30/15848  | 0.221658 | 0.796243 | 0.758705 | Soc_17G00 | 2  |
| bomi vs milin | GO:0005922 | connexin c   | 2/468  | 31/15848  | 0.232635 | 0.796243 | 0.758705 | Soc_3G001 | 2  |
| bomi vs milin | GO:0016746 | transferase  | 2/468  | 31/15848  | 0.232635 | 0.796243 | 0.758705 | Soc_11G00 | 2  |
| bomi vs milin | GO:0008092 | cytoskelet   | 2/468  | 32/15848  | 0.243644 | 0.796243 | 0.758705 | Soc_14G00 | 2  |
| bomi vs milin | GO:0005829 | cytosol      | 1/468  | 10/15848  | 0.259063 | 0.796243 | 0.758705 | Soc_3G000 | 1  |
| bomi vs milin | GO:0005883 | neurofilam   | 1/468  | 10/15848  | 0.259063 | 0.796243 | 0.758705 | Soc_4G000 | 1  |
| bomi vs milin | GO:0016712 | oxidoredu    | 1/468  | 10/15848  | 0.259063 | 0.796243 | 0.758705 | Soc_21G00 | 1  |
| bomi vs milin | GO:0045087 | innate imm   | 1/468  | 10/15848  | 0.259063 | 0.796243 | 0.758705 | Soc_4G000 | 1  |
| bomi vs milin | GO:0050839 | cell adhesi  | 1/468  | 10/15848  | 0.259063 | 0.796243 | 0.758705 | Soc_7G000 | 1  |
| bomi vs milin | GO:0005096 | GTPase ac    | 4/468  | 88/15848  | 0.262111 | 0.796243 | 0.758705 | Soc_10G00 | 4  |
| bomi vs milin | GO:0008289 | lipid bindi  | 4/468  | 88/15848  | 0.262111 | 0.796243 | 0.758705 | Soc_11G00 | 4  |
| bomi vs milin | GO:0046983 | protein dir  | 9/468  | 236/15848 | 0.263824 | 0.796243 | 0.758705 | Soc_1G000 | 9  |
| bomi vs milin | GO:0003707 | steroid ho   | 3/468  | 61/15848  | 0.268798 | 0.796243 | 0.758705 | Soc_19G00 | 3  |
| bomi vs milin | GO:0008076 | voltage-g    | 3/468  | 61/15848  | 0.268798 | 0.796243 | 0.758705 | Soc_20G00 | 3  |
| bomi vs milin | GO:0043401 | steroid ho   | 3/468  | 61/15848  | 0.268798 | 0.796243 | 0.758705 | Soc_19G00 | 3  |
| bomi vs milin | GO:0005737 | cytoplasm    | 9/468  | 238/15848 | 0.271663 | 0.796243 | 0.758705 | Soc_15G00 | 9  |
| bomi vs milin | GO:0003725 | double-str   | 1/468  | 11/15848  | 0.280957 | 0.796243 | 0.758705 | Soc_4G000 | 1  |
| bomi vs milin | GO:0006888 | endoplasm    | 1/468  | 11/15848  | 0.280957 | 0.796243 | 0.758705 | Soc_7G000 | 1  |
| bomi vs milin | GO:0032958 | inositol ph  | 1/468  | 11/15848  | 0.280957 | 0.796243 | 0.758705 | Soc_8G000 | 1  |
| bomi vs milin | GO:0044212 | transcripti  | 1/468  | 11/15848  | 0.280957 | 0.796243 | 0.758705 | Soc_11G00 | 1  |
| bomi vs milin | GO:0008373 | sialyltrans  | 2/468  | 36/15848  | 0.287777 | 0.796243 | 0.758705 | Soc_10G00 | 2  |
| bomi vs milin | GO:0015031 | protein tra  | 2/468  | 36/15848  | 0.287777 | 0.796243 | 0.758705 | Soc_3G000 | 2  |
| bomi vs milin | GO:0005856 | cytoskelet   | 4/468  | 93/15848  | 0.295095 | 0.796243 | 0.758705 | Soc_11G00 | 4  |
| bomi vs milin | GO:0007399 | nervous sy   | 2/468  | 37/15848  | 0.298786 | 0.796243 | 0.758705 | Soc_4G000 | 2  |
| bomi vs milin | GO:0004707 | MAP kinas    | 1/468  | 12/15848  | 0.302206 | 0.796243 | 0.758705 | Soc_18G00 | 1  |

|               |            |              |        |           |          |          |          |           |    |
|---------------|------------|--------------|--------|-----------|----------|----------|----------|-----------|----|
| bomi vs milin | GO:0007179 | transformi   | 1/468  | 12/15848  | 0.302206 | 0.796243 | 0.758705 | Soc_6G000 | 1  |
| bomi vs milin | GO:0008283 | cell popula  | 1/468  | 12/15848  | 0.302206 | 0.796243 | 0.758705 | Soc_20G00 | 1  |
| bomi vs milin | GO:0031175 | neuron pro   | 1/468  | 12/15848  | 0.302206 | 0.796243 | 0.758705 | Soc_15G00 | 1  |
| bomi vs milin | GO:0046982 | protein he   | 1/468  | 12/15848  | 0.302206 | 0.796243 | 0.758705 | Soc_7G000 | 1  |
| bomi vs milin | GO:0051056 | regulation   | 1/468  | 12/15848  | 0.302206 | 0.796243 | 0.758705 | Soc_23G00 | 1  |
| bomi vs milin | GO:0006260 | DNA repli    | 2/468  | 39/15848  | 0.320712 | 0.796243 | 0.758705 | Soc_1G001 | 2  |
| bomi vs milin | GO:0003730 | mRNA 3'-     | 1/468  | 13/15848  | 0.322828 | 0.796243 | 0.758705 | Soc_11G00 | 1  |
| bomi vs milin | GO:0005911 | cell-cell ju | 1/468  | 13/15848  | 0.322828 | 0.796243 | 0.758705 | Soc_7G000 | 1  |
| bomi vs milin | GO:0008253 | 5'-nucleot   | 1/468  | 13/15848  | 0.322828 | 0.796243 | 0.758705 | Soc_6G000 | 1  |
| bomi vs milin | GO:0016747 | transferase  | 1/468  | 13/15848  | 0.322828 | 0.796243 | 0.758705 | Soc_12G00 | 1  |
| bomi vs milin | GO:0007049 | cell cycle   | 2/468  | 40/15848  | 0.331614 | 0.796243 | 0.758705 | Soc_1G002 | 2  |
| bomi vs milin | GO:0051260 | protein ho   | 3/468  | 69/15848  | 0.33364  | 0.796243 | 0.758705 | Soc_20G00 | 3  |
| bomi vs milin | GO:0003714 | transcripti  | 1/468  | 14/15848  | 0.342841 | 0.796243 | 0.758705 | Soc_3G000 | 1  |
| bomi vs milin | GO:0005158 | insulin rec  | 1/468  | 14/15848  | 0.342841 | 0.796243 | 0.758705 | Soc_4G000 | 1  |
| bomi vs milin | GO:0005635 | nuclear en   | 1/468  | 14/15848  | 0.342841 | 0.796243 | 0.758705 | Soc_15G00 | 1  |
| bomi vs milin | GO:0006606 | protein im   | 1/468  | 14/15848  | 0.342841 | 0.796243 | 0.758705 | Soc_6G000 | 1  |
| bomi vs milin | GO:0007165 | signal tran  | 12/468 | 351/15848 | 0.343403 | 0.796243 | 0.758705 | Soc_10G00 | 12 |
| bomi vs milin | GO:0003729 | mRNA bin     | 1/468  | 15/15848  | 0.362265 | 0.799882 | 0.762172 | Soc_10G00 | 1  |
| bomi vs milin | GO:0004993 | G protein-   | 1/468  | 15/15848  | 0.362265 | 0.799882 | 0.762172 | Soc_20G00 | 1  |
| bomi vs milin | GO:0008033 | tRNA proc    | 1/468  | 15/15848  | 0.362265 | 0.799882 | 0.762172 | Soc_23G00 | 1  |
| bomi vs milin | GO:0046873 | metal ion    | 1/468  | 15/15848  | 0.362265 | 0.799882 | 0.762172 | Soc_19G00 | 1  |
| bomi vs milin | GO:0004842 | ubiquitin-   | 4/468  | 105/15848 | 0.375695 | 0.799882 | 0.762172 | Soc_1G002 | 4  |
| bomi vs milin | GO:0006310 | DNA recor    | 1/468  | 16/15848  | 0.381115 | 0.799882 | 0.762172 | Soc_4G000 | 1  |
| bomi vs milin | GO:0042803 | protein ho   | 1/468  | 16/15848  | 0.381115 | 0.799882 | 0.762172 | Soc_7G000 | 1  |
| bomi vs milin | GO:0003723 | RNA bindi    | 7/468  | 202/15848 | 0.387937 | 0.799882 | 0.762172 | Soc_10G00 | 7  |
| bomi vs milin | GO:0042626 | ATPase-cc    | 2/468  | 46/15848  | 0.395762 | 0.799882 | 0.762172 | Soc_13G00 | 2  |
| bomi vs milin | GO:0008083 | growth fac   | 4/468  | 108/15848 | 0.395841 | 0.799882 | 0.762172 | Soc_14G00 | 4  |
| bomi vs milin | GO:0006520 | cellular an  | 1/468  | 17/15848  | 0.39941  | 0.799882 | 0.762172 | Soc_8G000 | 1  |
| bomi vs milin | GO:0005249 | voltage-g    | 3/468  | 79/15848  | 0.414182 | 0.799882 | 0.762172 | Soc_20G00 | 3  |
| bomi vs milin | GO:0004190 | aspartic-ty  | 1/468  | 18/15848  | 0.417164 | 0.799882 | 0.762172 | Soc_24G00 | 1  |
| bomi vs milin | GO:0017137 | Rab GTPas    | 1/468  | 18/15848  | 0.417164 | 0.799882 | 0.762172 | Soc_1G002 | 1  |
| bomi vs milin | GO:0042310 | vasoconst    | 1/468  | 18/15848  | 0.417164 | 0.799882 | 0.762172 | Soc_20G00 | 1  |
| bomi vs milin | GO:0007154 | cell comm    | 2/468  | 49/15848  | 0.426781 | 0.799882 | 0.762172 | Soc_3G001 | 2  |
| bomi vs milin | GO:0003824 | catalytic ac | 6/468  | 178/15848 | 0.429828 | 0.799882 | 0.762172 | Soc_14G00 | 6  |
| bomi vs milin | GO:0003333 | amino acid   | 1/468  | 19/15848  | 0.434395 | 0.799882 | 0.762172 | Soc_1G000 | 1  |
| bomi vs milin | GO:0005201 | extracellul  | 1/468  | 19/15848  | 0.434395 | 0.799882 | 0.762172 | Soc_18G00 | 1  |
| bomi vs milin | GO:0015171 | amino acid   | 1/468  | 19/15848  | 0.434395 | 0.799882 | 0.762172 | Soc_1G000 | 1  |
| bomi vs milin | GO:0016627 | oxidoredu    | 1/468  | 19/15848  | 0.434395 | 0.799882 | 0.762172 | Soc_15G00 | 1  |

|               |            |              |       |           |          |          |          |           |   |
|---------------|------------|--------------|-------|-----------|----------|----------|----------|-----------|---|
| bomi vs milin | GO:0009058 | biosynthes   | 2/468 | 50/15848  | 0.436935 | 0.799882 | 0.762172 | Soc_12G00 | 2 |
| bomi vs milin | GO:0005198 | structural   | 6/468 | 181/15848 | 0.445559 | 0.799882 | 0.762172 | Soc_14G00 | 6 |
| bomi vs milin | GO:0008168 | methyltran   | 2/468 | 51/15848  | 0.446992 | 0.799882 | 0.762172 | Soc_15G00 | 2 |
| bomi vs milin | GO:0000398 | mRNA spli    | 1/468 | 20/15848  | 0.451118 | 0.799882 | 0.762172 | Soc_6G000 | 1 |
| bomi vs milin | GO:0004114 | 3',5'-cyclic | 1/468 | 20/15848  | 0.451118 | 0.799882 | 0.762172 | Soc_18G00 | 1 |
| bomi vs milin | GO:0004843 | thiol-depe   | 1/468 | 20/15848  | 0.451118 | 0.799882 | 0.762172 | Soc_3G000 | 1 |
| bomi vs milin | GO:0098609 | cell-cell ad | 1/468 | 20/15848  | 0.451118 | 0.799882 | 0.762172 | Soc_11G00 | 1 |
| bomi vs milin | GO:0005242 | inward rec   | 1/468 | 21/15848  | 0.467347 | 0.80171  | 0.763914 | Soc_1G002 | 1 |
| bomi vs milin | GO:0005540 | hyaluronic   | 1/468 | 21/15848  | 0.467347 | 0.80171  | 0.763914 | Soc_10G00 | 1 |
| bomi vs milin | GO:0006338 | chromatin    | 1/468 | 21/15848  | 0.467347 | 0.80171  | 0.763914 | Soc_8G000 | 1 |
| bomi vs milin | GO:0007015 | actin filam  | 1/468 | 21/15848  | 0.467347 | 0.80171  | 0.763914 | Soc_7G000 | 1 |
| bomi vs milin | GO:0007601 | visual perc  | 2/468 | 54/15848  | 0.47654  | 0.803956 | 0.766054 | Soc_20G00 | 2 |
| bomi vs milin | GO:0005794 | Golgi appa   | 1/468 | 22/15848  | 0.483098 | 0.803956 | 0.766054 | Soc_13G00 | 1 |
| bomi vs milin | GO:0045892 | negative re  | 1/468 | 22/15848  | 0.483098 | 0.803956 | 0.766054 | Soc_13G00 | 1 |
| bomi vs milin | GO:0022857 | transmem     | 3/468 | 88/15848  | 0.483898 | 0.803956 | 0.766054 | Soc_18G00 | 3 |
| bomi vs milin | GO:0016301 | kinase acti  | 2/468 | 56/15848  | 0.495698 | 0.803995 | 0.766092 | Soc_6G000 | 2 |
| bomi vs milin | GO:0030001 | metal ion    | 1/468 | 23/15848  | 0.498383 | 0.803995 | 0.766092 | Soc_19G00 | 1 |
| bomi vs milin | GO:0042613 | MHC class    | 1/468 | 23/15848  | 0.498383 | 0.803995 | 0.766092 | Soc_13G00 | 1 |
| bomi vs milin | GO:0006813 | potassium    | 4/468 | 125/15848 | 0.506756 | 0.803995 | 0.766092 | Soc_1G002 | 4 |
| bomi vs milin | GO:0005262 | calcium ch   | 1/468 | 24/15848  | 0.513218 | 0.803995 | 0.766092 | Soc_9G000 | 1 |
| bomi vs milin | GO:0008378 | galactosyl   | 1/468 | 24/15848  | 0.513218 | 0.803995 | 0.766092 | Soc_18G00 | 1 |
| bomi vs milin | GO:0019882 | antigen pr   | 1/468 | 24/15848  | 0.513218 | 0.803995 | 0.766092 | Soc_13G00 | 1 |
| bomi vs milin | GO:0008138 | protein tyr  | 2/468 | 58/15848  | 0.514405 | 0.803995 | 0.766092 | Soc_11G00 | 2 |
| bomi vs milin | GO:0008565 | obsolete p   | 1/468 | 25/15848  | 0.527615 | 0.818579 | 0.779988 | Soc_6G000 | 1 |
| bomi vs milin | GO:0007268 | chemical s   | 1/468 | 26/15848  | 0.541587 | 0.826742 | 0.787766 | Soc_2G000 | 1 |
| bomi vs milin | GO:0009966 | regulation   | 1/468 | 26/15848  | 0.541587 | 0.826742 | 0.787766 | Soc_11G00 | 1 |
| bomi vs milin | GO:0005200 | structural   | 1/468 | 27/15848  | 0.555146 | 0.826742 | 0.787766 | Soc_13G00 | 1 |
| bomi vs milin | GO:0005328 | neurotrans   | 1/468 | 27/15848  | 0.555146 | 0.826742 | 0.787766 | Soc_9G000 | 1 |
| bomi vs milin | GO:0009055 | electron tr  | 1/468 | 27/15848  | 0.555146 | 0.826742 | 0.787766 | Soc_2G000 | 1 |
| bomi vs milin | GO:0016311 | dephosph     | 3/468 | 98/15848  | 0.556385 | 0.826742 | 0.787766 | Soc_11G00 | 3 |
| bomi vs milin | GO:0016567 | protein ub   | 2/468 | 64/15848  | 0.567704 | 0.832725 | 0.793467 | Soc_20G00 | 2 |
| bomi vs milin | GO:0043547 | positive re  | 1/468 | 28/15848  | 0.568305 | 0.832725 | 0.793467 | Soc_10G00 | 1 |
| bomi vs milin | GO:0005234 | extracellul  | 1/468 | 29/15848  | 0.581076 | 0.84467  | 0.804849 | Soc_6G000 | 1 |
| bomi vs milin | GO:0046872 | metal ion    | 6/468 | 210/15848 | 0.59013  | 0.84467  | 0.804849 | Soc_12G00 | 6 |
| bomi vs milin | GO:0009190 | cyclic nucl  | 1/468 | 30/15848  | 0.59347  | 0.84467  | 0.804849 | Soc_15G00 | 1 |
| bomi vs milin | GO:0016849 | phosphoru    | 1/468 | 30/15848  | 0.59347  | 0.84467  | 0.804849 | Soc_15G00 | 1 |
| bomi vs milin | GO:0005887 | integral co  | 4/468 | 141/15848 | 0.60209  | 0.84467  | 0.804849 | Soc_13G00 | 4 |
| bomi vs milin | GO:0006897 | endocytos    | 1/468 | 31/15848  | 0.605497 | 0.84467  | 0.804849 | Soc_5G000 | 1 |

|               |            |             |        |           |          |          |          |           |    |
|---------------|------------|-------------|--------|-----------|----------|----------|----------|-----------|----|
| bomi vs milin | GO:0006811 | ion transp  | 8/468  | 285/15848 | 0.60795  | 0.84467  | 0.804849 | Soc_20G00 | 8  |
| bomi vs milin | GO:0016791 | phosphata   | 3/468  | 106/15848 | 0.609779 | 0.84467  | 0.804849 | Soc_11G00 | 3  |
| bomi vs milin | GO:0007017 | microtubu   | 1/468  | 32/15848  | 0.61717  | 0.84467  | 0.804849 | Soc_13G00 | 1  |
| bomi vs milin | GO:0016887 | ATPase ac   | 2/468  | 71/15848  | 0.624386 | 0.84467  | 0.804849 | Soc_13G00 | 2  |
| bomi vs milin | GO:0004970 | ionotropic  | 1/468  | 33/15848  | 0.628498 | 0.84467  | 0.804849 | Soc_6G000 | 1  |
| bomi vs milin | GO:0005886 | plasma me   | 1/468  | 33/15848  | 0.628498 | 0.84467  | 0.804849 | Soc_15G00 | 1  |
| bomi vs milin | GO:0016616 | oxidoredu   | 1/468  | 33/15848  | 0.628498 | 0.84467  | 0.804849 | Soc_15G00 | 1  |
| bomi vs milin | GO:0005667 | transcripti | 1/468  | 34/15848  | 0.639492 | 0.853044 | 0.812829 | Soc_6G000 | 1  |
| bomi vs milin | GO:0005216 | ion channe  | 7/468  | 258/15848 | 0.642911 | 0.853044 | 0.812829 | Soc_20G00 | 7  |
| bomi vs milin | GO:0016705 | oxidoredu   | 2/468  | 74/15848  | 0.646858 | 0.853044 | 0.812829 | Soc_12G00 | 2  |
| bomi vs milin | GO:0006836 | neurotrans  | 1/468  | 36/15848  | 0.660514 | 0.865643 | 0.824833 | Soc_9G000 | 1  |
| bomi vs milin | GO:0008080 | N-acetyltr  | 1/468  | 38/15848  | 0.680314 | 0.886088 | 0.844314 | Soc_15G00 | 1  |
| bomi vs milin | GO:0005783 | endoplasm   | 1/468  | 39/15848  | 0.689777 | 0.892901 | 0.850807 | Soc_9G000 | 1  |
| bomi vs milin | GO:0016192 | vesicle-me  | 2/468  | 82/15848  | 0.701569 | 0.902629 | 0.860075 | Soc_12G00 | 2  |
| bomi vs milin | GO:0005615 | extracellul | 2/468  | 83/15848  | 0.707889 | 0.90524  | 0.862564 | Soc_14G00 | 2  |
| bomi vs milin | GO:0005089 | Rho guan    | 2/468  | 84/15848  | 0.714097 | 0.905306 | 0.862626 | Soc_11G00 | 2  |
| bomi vs milin | GO:0051082 | unfolded p  | 1/468  | 42/15848  | 0.716522 | 0.905306 | 0.862626 | Soc_15G00 | 1  |
| bomi vs milin | GO:0006816 | calcium io  | 1/468  | 43/15848  | 0.724915 | 0.910459 | 0.867537 | Soc_9G000 | 1  |
| bomi vs milin | GO:0005882 | intermedia  | 2/468  | 87/15848  | 0.732061 | 0.913993 | 0.870904 | Soc_4G000 | 2  |
| bomi vs milin | GO:0035023 | regulation  | 2/468  | 88/15848  | 0.737832 | 0.914291 | 0.871188 | Soc_11G00 | 2  |
| bomi vs milin | GO:0005874 | microtubu   | 1/468  | 45/15848  | 0.740966 | 0.914291 | 0.871188 | Soc_13G00 | 1  |
| bomi vs milin | GO:0003700 | DNA-bind    | 12/468 | 476/15848 | 0.752401 | 0.915947 | 0.872766 | Soc_11G00 | 12 |
| bomi vs milin | GO:0020037 | heme bind   | 2/468  | 91/15848  | 0.754513 | 0.915947 | 0.872766 | Soc_12G00 | 2  |
| bomi vs milin | GO:0016757 | transferase | 1/468  | 47/15848  | 0.756081 | 0.915947 | 0.872766 | Soc_11G00 | 1  |
| bomi vs milin | GO:0031012 | extracellul | 1/468  | 48/15848  | 0.763306 | 0.915947 | 0.872766 | Soc_5G000 | 1  |
| bomi vs milin | GO:0015074 | DNA integ   | 2/468  | 94/15848  | 0.770271 | 0.915947 | 0.872766 | Soc_12G00 | 2  |
| bomi vs milin | GO:0016491 | oxidoredu   | 4/468  | 179/15848 | 0.778713 | 0.915947 | 0.872766 | Soc_11G00 | 4  |
| bomi vs milin | GO:0008017 | microtubu   | 2/468  | 96/15848  | 0.780282 | 0.915947 | 0.872766 | Soc_13G00 | 2  |
| bomi vs milin | GO:0007264 | small GTPa  | 3/468  | 139/15848 | 0.782493 | 0.915947 | 0.872766 | Soc_10G00 | 3  |
| bomi vs milin | GO:0008234 | cysteine-t  | 1/468  | 52/15848  | 0.790131 | 0.915947 | 0.872766 | Soc_20G00 | 1  |
| bomi vs milin | GO:0036459 | thiol-depe  | 1/468  | 52/15848  | 0.790131 | 0.915947 | 0.872766 | Soc_8G000 | 1  |
| bomi vs milin | GO:0004252 | serine-tyr  | 3/468  | 143/15848 | 0.79841  | 0.915947 | 0.872766 | Soc_1G000 | 3  |
| bomi vs milin | GO:0008152 | metabolic   | 5/468  | 226/15848 | 0.801294 | 0.915947 | 0.872766 | Soc_11G00 | 5  |
| bomi vs milin | GO:0000287 | magnesiur   | 1/468  | 54/15848  | 0.802383 | 0.915947 | 0.872766 | Soc_6G000 | 1  |
| bomi vs milin | GO:0004872 | signaling r | 1/468  | 55/15848  | 0.808238 | 0.915947 | 0.872766 | Soc_6G000 | 1  |
| bomi vs milin | GO:0070588 | calcium io  | 1/468  | 55/15848  | 0.808238 | 0.915947 | 0.872766 | Soc_9G000 | 1  |
| bomi vs milin | GO:0006396 | RNA proce   | 1/468  | 56/15848  | 0.813921 | 0.915947 | 0.872766 | Soc_5G000 | 1  |
| bomi vs milin | GO:0005739 | mitochond   | 1/468  | 57/15848  | 0.819435 | 0.915947 | 0.872766 | Soc_8G000 | 1  |

|                |            |              |        |           |          |          |          |           |    |
|----------------|------------|--------------|--------|-----------|----------|----------|----------|-----------|----|
| bomi vs milin  | GO:0007155 | cell adhesi  | 3/468  | 149/15848 | 0.820452 | 0.915947 | 0.872766 | Soc_15G00 | 3  |
| bomi vs milin  | GO:0005085 | guanyl-nu    | 1/468  | 58/15848  | 0.824787 | 0.915947 | 0.872766 | Soc_10G00 | 1  |
| bomi vs milin  | GO:0006915 | apoptotic    | 1/468  | 60/15848  | 0.835019 | 0.922456 | 0.878968 | Soc_8G000 | 1  |
| bomi vs milin  | GO:0005622 | intracellula | 9/468  | 400/15848 | 0.83961  | 0.922696 | 0.879197 | Soc_10G00 | 9  |
| bomi vs milin  | GO:0016579 | protein de   | 1/468  | 63/15848  | 0.849261 | 0.927929 | 0.884183 | Soc_8G000 | 1  |
| bomi vs milin  | GO:0006886 | intracellula | 2/468  | 115/15848 | 0.857739 | 0.927929 | 0.884183 | Soc_1G000 | 2  |
| bomi vs milin  | GO:0007018 | microtubu    | 1/468  | 66/15848  | 0.862276 | 0.927929 | 0.884183 | Soc_1G000 | 1  |
| bomi vs milin  | GO:0008146 | sulfotransf  | 1/468  | 66/15848  | 0.862276 | 0.927929 | 0.884183 | Soc_13G00 | 1  |
| bomi vs milin  | GO:0003777 | microtubu    | 1/468  | 67/15848  | 0.86636  | 0.927929 | 0.884183 | Soc_1G000 | 1  |
| bomi vs milin  | GO:0035556 | intracellula | 3/468  | 170/15848 | 0.882107 | 0.940023 | 0.895707 | Soc_15G00 | 3  |
| bomi vs milin  | GO:0006629 | lipid meta   | 1/468  | 76/15848  | 0.898085 | 0.950184 | 0.905388 | Soc_4G000 | 1  |
| bomi vs milin  | GO:0005576 | extracellul  | 6/468  | 311/15848 | 0.900782 | 0.950184 | 0.905388 | Soc_11G00 | 6  |
| bomi vs milin  | GO:0016787 | hydrolase    | 2/468  | 134/15848 | 0.909473 | 0.950184 | 0.905388 | Soc_20G00 | 2  |
| bomi vs milin  | GO:0007275 | multicellul  | 1/468  | 80/15848  | 0.909655 | 0.950184 | 0.905388 | Soc_11G00 | 1  |
| bomi vs milin  | GO:0000786 | nucleosom    | 2/468  | 137/15848 | 0.915821 | 0.951912 | 0.907035 | Soc_3G000 | 2  |
| bomi vs milin  | GO:0043565 | sequence-    | 3/468  | 191/15848 | 0.924182 | 0.953964 | 0.90899  | Soc_20G00 | 3  |
| bomi vs milin  | GO:0005840 | ribosome     | 1/468  | 87/15848  | 0.926837 | 0.953964 | 0.90899  | Soc_18G00 | 1  |
| bomi vs milin  | GO:0006412 | translation  | 1/468  | 91/15848  | 0.935148 | 0.957846 | 0.912689 | Soc_18G00 | 1  |
| bomi vs milin  | GO:0003735 | structural   | 1/468  | 97/15848  | 0.945882 | 0.96416  | 0.918705 | Soc_18G00 | 1  |
| bomi vs milin  | GO:0006955 | immune re    | 1/468  | 127/15848 | 0.978123 | 0.989998 | 0.943326 | Soc_13G00 | 1  |
| bomi vs milin  | GO:0007156 | homophili    | 1/468  | 131/15848 | 0.980614 | 0.989998 | 0.943326 | Soc_22G00 | 1  |
| bomi vs milin  | GO:0004888 | transmem     | 1/468  | 165/15848 | 0.993071 | 0.995385 | 0.948459 | Soc_4G000 | 1  |
| bomi vs milin  | GO:0006508 | proteolysis  | 5/468  | 422/15848 | 0.995385 | 0.995385 | 0.948459 | Soc_1G000 | 5  |
| bomi vs linzhi | GO:0000786 | nucleosom    | 17/420 | 137/15848 | 1.30E-07 | 2.68E-05 | 2.55E-05 | Soc_21G00 | 17 |
| bomi vs linzhi | GO:0004866 | endopepti    | 5/420  | 22/15848  | 0.000232 | 0.019743 | 0.018764 | Soc_5G000 | 5  |
| bomi vs linzhi | GO:0008417 | fucosyltra   | 4/420  | 13/15848  | 0.000288 | 0.019743 | 0.018764 | Soc_13G00 | 4  |
| bomi vs linzhi | GO:0045095 | keratin fila | 3/420  | 12/15848  | 0.003402 | 0.175194 | 0.16651  | Soc_15G00 | 3  |
| bomi vs linzhi | GO:0006397 | mRNA pro     | 4/420  | 29/15848  | 0.006834 | 0.196244 | 0.186517 | Soc_3G000 | 4  |
| bomi vs linzhi | GO:0007596 | blood coa    | 3/420  | 16/15848  | 0.008004 | 0.196244 | 0.186517 | Soc_20G00 | 3  |
| bomi vs linzhi | GO:0005882 | intermedia   | 7/420  | 87/15848  | 0.008281 | 0.196244 | 0.186517 | Soc_15G00 | 7  |
| bomi vs linzhi | GO:0006486 | protein gly  | 7/420  | 87/15848  | 0.008281 | 0.196244 | 0.186517 | Soc_13G00 | 7  |
| bomi vs linzhi | GO:0006334 | nucleosom    | 5/420  | 48/15848  | 0.008574 | 0.196244 | 0.186517 | Soc_3G000 | 5  |
| bomi vs linzhi | GO:0008168 | methyltra    | 5/420  | 51/15848  | 0.01103  | 0.227212 | 0.21595  | Soc_18G00 | 5  |
| bomi vs linzhi | GO:0004888 | transmem     | 10/420 | 165/15848 | 0.012636 | 0.236635 | 0.224906 | Soc_13G00 | 10 |
| bomi vs linzhi | GO:0007166 | cell surfac  | 6/420  | 86/15848  | 0.026596 | 0.335938 | 0.319287 | Soc_14G00 | 6  |
| bomi vs linzhi | GO:0004571 | mannosyl-    | 2/420  | 10/15848  | 0.02739  | 0.335938 | 0.319287 | Soc_6G000 | 2  |
| bomi vs linzhi | GO:0005883 | neurofilam   | 2/420  | 10/15848  | 0.02739  | 0.335938 | 0.319287 | Soc_18G00 | 2  |
| bomi vs linzhi | GO:0050662 | obsolete c   | 2/420  | 10/15848  | 0.02739  | 0.335938 | 0.319287 | Soc_12G00 | 2  |

|                |            |              |        |           |          |          |          |           |    |
|----------------|------------|--------------|--------|-----------|----------|----------|----------|-----------|----|
| bomi vs linzhi | GO:0022848 | acetylchol   | 3/420  | 25/15848  | 0.02759  | 0.335938 | 0.319287 | Soc_4G000 | 3  |
| bomi vs linzhi | GO:0003700 | DNA-bind     | 20/420 | 476/15848 | 0.029111 | 0.335938 | 0.319287 | Soc_11G00 | 20 |
| bomi vs linzhi | GO:0022857 | transmem     | 6/420  | 88/15848  | 0.029354 | 0.335938 | 0.319287 | Soc_18G00 | 6  |
| bomi vs linzhi | GO:1902476 | chloride tr  | 2/420  | 12/15848  | 0.038798 | 0.420648 | 0.399799 | Soc_24G00 | 2  |
| bomi vs linzhi | GO:0045211 | postsynap    | 3/420  | 31/15848  | 0.048035 | 0.494761 | 0.470238 | Soc_4G000 | 3  |
| bomi vs linzhi | GO:0006364 | rRNA proc    | 2/420  | 15/15848  | 0.058601 | 0.524863 | 0.498848 | Soc_5G000 | 2  |
| bomi vs linzhi | GO:0008033 | tRNA proc    | 2/420  | 15/15848  | 0.058601 | 0.524863 | 0.498848 | Soc_14G00 | 2  |
| bomi vs linzhi | GO:0019905 | syntaxin b   | 2/420  | 15/15848  | 0.058601 | 0.524863 | 0.498848 | Soc_12G00 | 2  |
| bomi vs linzhi | GO:0008138 | protein tyr  | 4/420  | 58/15848  | 0.067466 | 0.549471 | 0.522236 | Soc_11G00 | 4  |
| bomi vs linzhi | GO:0008373 | sialyltransf | 3/420  | 36/15848  | 0.069351 | 0.549471 | 0.522236 | Soc_24G00 | 3  |
| bomi vs linzhi | GO:0015031 | protein tra  | 3/420  | 36/15848  | 0.069351 | 0.549471 | 0.522236 | Soc_20G00 | 3  |
| bomi vs linzhi | GO:0004190 | aspartic-ty  | 2/420  | 18/15848  | 0.081101 | 0.618769 | 0.588099 | Soc_12G00 | 2  |
| bomi vs linzhi | GO:0000398 | mRNA spli    | 2/420  | 20/15848  | 0.097332 | 0.650594 | 0.618347 | Soc_23G00 | 2  |
| bomi vs linzhi | GO:0000413 | protein pe   | 2/420  | 20/15848  | 0.097332 | 0.650594 | 0.618347 | Soc_21G00 | 2  |
| bomi vs linzhi | GO:0006954 | inflammat    | 2/420  | 20/15848  | 0.097332 | 0.650594 | 0.618347 | Soc_19G00 | 2  |
| bomi vs linzhi | GO:0003755 | peptidyl-p   | 2/420  | 21/15848  | 0.105762 | 0.650594 | 0.618347 | Soc_21G00 | 2  |
| bomi vs linzhi | GO:0006470 | protein de   | 6/420  | 123/15848 | 0.108754 | 0.650594 | 0.618347 | Soc_11G00 | 6  |
| bomi vs linzhi | GO:0016459 | myosin co    | 4/420  | 70/15848  | 0.114712 | 0.650594 | 0.618347 | Soc_10G00 | 4  |
| bomi vs linzhi | GO:0016311 | dephosph     | 5/420  | 98/15848  | 0.118872 | 0.650594 | 0.618347 | Soc_11G00 | 5  |
| bomi vs linzhi | GO:0003774 | motor acti   | 4/420  | 71/15848  | 0.119173 | 0.650594 | 0.618347 | Soc_10G00 | 4  |
| bomi vs linzhi | GO:0005230 | extracellul  | 4/420  | 71/15848  | 0.119173 | 0.650594 | 0.618347 | Soc_13G00 | 4  |
| bomi vs linzhi | GO:0004298 | threonine-   | 2/420  | 23/15848  | 0.123171 | 0.650594 | 0.618347 | Soc_14G00 | 2  |
| bomi vs linzhi | GO:0005839 | proteasom    | 2/420  | 23/15848  | 0.123171 | 0.650594 | 0.618347 | Soc_14G00 | 2  |
| bomi vs linzhi | GO:0051603 | proteolysis  | 2/420  | 23/15848  | 0.123171 | 0.650594 | 0.618347 | Soc_14G00 | 2  |
| bomi vs linzhi | GO:0007010 | cytoskelet   | 2/420  | 25/15848  | 0.141207 | 0.727216 | 0.691171 | Soc_15G00 | 2  |
| bomi vs linzhi | GO:0005789 | endoplasm    | 2/420  | 26/15848  | 0.150425 | 0.737799 | 0.701229 | Soc_12G00 | 2  |
| bomi vs linzhi | GO:0007160 | cell-matrix  | 2/420  | 26/15848  | 0.150425 | 0.737799 | 0.701229 | Soc_19G00 | 2  |
| bomi vs linzhi | GO:0005249 | voltage-g    | 4/420  | 79/15848  | 0.157393 | 0.74796  | 0.710887 | Soc_14G00 | 4  |
| bomi vs linzhi | GO:0009607 | response t   | 2/420  | 27/15848  | 0.159758 | 0.74796  | 0.710887 | Soc_12G00 | 2  |
| bomi vs linzhi | GO:0003950 | NAD+ AD      | 2/420  | 28/15848  | 0.169195 | 0.773707 | 0.735358 | Soc_20G00 | 2  |
| bomi vs linzhi | GO:0034220 | ion transm   | 4/420  | 82/15848  | 0.172769 | 0.773707 | 0.735358 | Soc_13G00 | 4  |
| bomi vs linzhi | GO:0005739 | mitochond    | 3/420  | 57/15848  | 0.191896 | 0.828029 | 0.786987 | Soc_14G00 | 3  |
| bomi vs linzhi | GO:0005198 | structural   | 7/420  | 181/15848 | 0.205475 | 0.828029 | 0.786987 | Soc_15G00 | 7  |
| bomi vs linzhi | GO:0008076 | voltage-g    | 3/420  | 61/15848  | 0.21937  | 0.828029 | 0.786987 | Soc_17G00 | 3  |
| bomi vs linzhi | GO:0003956 | NAD(P)+ -    | 1/420  | 10/15848  | 0.235605 | 0.828029 | 0.786987 | Soc_20G00 | 1  |
| bomi vs linzhi | GO:0005829 | cytosol      | 1/420  | 10/15848  | 0.235605 | 0.828029 | 0.786987 | Soc_11G00 | 1  |
| bomi vs linzhi | GO:0016868 | intramolec   | 1/420  | 10/15848  | 0.235605 | 0.828029 | 0.786987 | Soc_18G00 | 1  |
| bomi vs linzhi | GO:0016567 | protein ub   | 3/420  | 64/15848  | 0.24047  | 0.828029 | 0.786987 | Soc_11G00 | 3  |

|                |            |              |        |           |          |          |          |           |    |
|----------------|------------|--------------|--------|-----------|----------|----------|----------|-----------|----|
| bomi vs linzhi | GO:0008146 | sulfotransf  | 3/420  | 66/15848  | 0.254718 | 0.828029 | 0.786987 | Soc_13G00 | 3  |
| bomi vs linzhi | GO:0005212 | structural   | 1/420  | 11/15848  | 0.255875 | 0.828029 | 0.786987 | Soc_21G00 | 1  |
| bomi vs linzhi | GO:0006471 | protein AD   | 1/420  | 11/15848  | 0.255875 | 0.828029 | 0.786987 | Soc_20G00 | 1  |
| bomi vs linzhi | GO:0007224 | smoother     | 1/420  | 11/15848  | 0.255875 | 0.828029 | 0.786987 | Soc_14G00 | 1  |
| bomi vs linzhi | GO:0030414 | peptidase    | 1/420  | 11/15848  | 0.255875 | 0.828029 | 0.786987 | Soc_15G00 | 1  |
| bomi vs linzhi | GO:0044212 | transcripti  | 1/420  | 11/15848  | 0.255875 | 0.828029 | 0.786987 | Soc_11G00 | 1  |
| bomi vs linzhi | GO:0006357 | regulation   | 4/420  | 97/15848  | 0.256053 | 0.828029 | 0.786987 | Soc_11G00 | 4  |
| bomi vs linzhi | GO:0005622 | intracellula | 13/420 | 400/15848 | 0.264579 | 0.828029 | 0.786987 | Soc_12G00 | 13 |
| bomi vs linzhi | GO:0000139 | Golgi men    | 1/420  | 12/15848  | 0.275609 | 0.828029 | 0.786987 | Soc_12G00 | 1  |
| bomi vs linzhi | GO:0000724 | double-str   | 1/420  | 12/15848  | 0.275609 | 0.828029 | 0.786987 | Soc_11G00 | 1  |
| bomi vs linzhi | GO:0004707 | MAP kinas    | 1/420  | 12/15848  | 0.275609 | 0.828029 | 0.786987 | Soc_15G00 | 1  |
| bomi vs linzhi | GO:0019752 | carboxylic   | 1/420  | 12/15848  | 0.275609 | 0.828029 | 0.786987 | Soc_22G00 | 1  |
| bomi vs linzhi | GO:0031175 | neuron pro   | 1/420  | 12/15848  | 0.275609 | 0.828029 | 0.786987 | Soc_15G00 | 1  |
| bomi vs linzhi | GO:0003723 | RNA bindi    | 7/420  | 202/15848 | 0.289051 | 0.828029 | 0.786987 | Soc_14G00 | 7  |
| bomi vs linzhi | GO:0008253 | 5'-nucleot   | 1/420  | 13/15848  | 0.294822 | 0.828029 | 0.786987 | Soc_17G00 | 1  |
| bomi vs linzhi | GO:0008271 | secondary    | 1/420  | 13/15848  | 0.294822 | 0.828029 | 0.786987 | Soc_15G00 | 1  |
| bomi vs linzhi | GO:0008272 | sulfate tra  | 1/420  | 13/15848  | 0.294822 | 0.828029 | 0.786987 | Soc_15G00 | 1  |
| bomi vs linzhi | GO:0015116 | sulfate tra  | 1/420  | 13/15848  | 0.294822 | 0.828029 | 0.786987 | Soc_15G00 | 1  |
| bomi vs linzhi | GO:0004842 | ubiquitin-   | 4/420  | 105/15848 | 0.303362 | 0.828029 | 0.786987 | Soc_11G00 | 4  |
| bomi vs linzhi | GO:0016791 | phosphata    | 4/420  | 106/15848 | 0.309353 | 0.828029 | 0.786987 | Soc_11G00 | 4  |
| bomi vs linzhi | GO:0004175 | endopepti    | 1/420  | 14/15848  | 0.313525 | 0.828029 | 0.786987 | Soc_14G00 | 1  |
| bomi vs linzhi | GO:0005635 | nuclear en   | 1/420  | 14/15848  | 0.313525 | 0.828029 | 0.786987 | Soc_15G00 | 1  |
| bomi vs linzhi | GO:0005852 | eukaryotic   | 1/420  | 14/15848  | 0.313525 | 0.828029 | 0.786987 | Soc_20G00 | 1  |
| bomi vs linzhi | GO:0016477 | cell migrat  | 1/420  | 14/15848  | 0.313525 | 0.828029 | 0.786987 | Soc_15G00 | 1  |
| bomi vs linzhi | GO:0045028 | G protein-   | 1/420  | 14/15848  | 0.313525 | 0.828029 | 0.786987 | Soc_16G00 | 1  |
| bomi vs linzhi | GO:0004869 | cysteine-t   | 1/420  | 15/15848  | 0.331734 | 0.830112 | 0.788967 | Soc_5G000 | 1  |
| bomi vs linzhi | GO:0030286 | dynein cor   | 1/420  | 15/15848  | 0.331734 | 0.830112 | 0.788967 | Soc_23G00 | 1  |
| bomi vs linzhi | GO:0046873 | metal ion    | 1/420  | 15/15848  | 0.331734 | 0.830112 | 0.788967 | Soc_19G00 | 1  |
| bomi vs linzhi | GO:0003824 | catalytic ac | 6/420  | 178/15848 | 0.333586 | 0.830112 | 0.788967 | Soc_11G00 | 6  |
| bomi vs linzhi | GO:0042981 | regulation   | 3/420  | 77/15848  | 0.334463 | 0.830112 | 0.788967 | Soc_1G000 | 3  |
| bomi vs linzhi | GO:0004867 | serine-tyr   | 2/420  | 46/15848  | 0.345409 | 0.840563 | 0.7989   | Soc_15G00 | 2  |
| bomi vs linzhi | GO:0006869 | lipid trans  | 2/420  | 47/15848  | 0.355072 | 0.840563 | 0.7989   | Soc_12G00 | 2  |
| bomi vs linzhi | GO:0031012 | extracellul  | 2/420  | 48/15848  | 0.364684 | 0.840563 | 0.7989   | Soc_19G00 | 2  |
| bomi vs linzhi | GO:0004879 | nuclear rec  | 1/420  | 17/15848  | 0.366719 | 0.840563 | 0.7989   | Soc_11G00 | 1  |
| bomi vs linzhi | GO:0016192 | vesicle-me   | 3/420  | 82/15848  | 0.370794 | 0.840563 | 0.7989   | Soc_12G00 | 3  |
| bomi vs linzhi | GO:0003684 | damaged      | 1/420  | 18/15848  | 0.38352  | 0.840563 | 0.7989   | Soc_5G000 | 1  |
| bomi vs linzhi | GO:0008021 | synaptic ve  | 1/420  | 18/15848  | 0.38352  | 0.840563 | 0.7989   | Soc_20G00 | 1  |
| bomi vs linzhi | GO:0017137 | Rab GTPas    | 1/420  | 18/15848  | 0.38352  | 0.840563 | 0.7989   | Soc_22G00 | 1  |



|                |            |              |       |           |          |          |          |           |   |
|----------------|------------|--------------|-------|-----------|----------|----------|----------|-----------|---|
| bomi vs linzhi | GO:0043565 | sequence     | 6/420 | 191/15848 | 0.395061 | 0.840563 | 0.7989   | Soc_11G00 | 6 |
| bomi vs linzhi | GO:0004386 | helicase ac  | 1/420 | 19/15848  | 0.399877 | 0.840563 | 0.7989   | Soc_11G00 | 1 |
| bomi vs linzhi | GO:0005743 | mitochond    | 1/420 | 19/15848  | 0.399877 | 0.840563 | 0.7989   | Soc_9G000 | 1 |
| bomi vs linzhi | GO:0006351 | transcripti  | 2/420 | 53/15848  | 0.411842 | 0.840563 | 0.7989   | Soc_15G00 | 2 |
| bomi vs linzhi | GO:0008289 | lipid bindi  | 3/420 | 88/15848  | 0.413869 | 0.840563 | 0.7989   | Soc_12G00 | 3 |
| bomi vs linzhi | GO:0004114 | 3',5'-cyclic | 1/420 | 20/15848  | 0.4158   | 0.840563 | 0.7989   | Soc_1G002 | 1 |
| bomi vs linzhi | GO:0005104 | fibroblast   | 1/420 | 20/15848  | 0.4158   | 0.840563 | 0.7989   | Soc_11G00 | 1 |
| bomi vs linzhi | GO:0005507 | copper ion   | 1/420 | 20/15848  | 0.4158   | 0.840563 | 0.7989   | Soc_22G00 | 1 |
| bomi vs linzhi | GO:0006813 | potassium    | 4/420 | 125/15848 | 0.423644 | 0.840563 | 0.7989   | Soc_14G00 | 4 |
| bomi vs linzhi | GO:0045893 | positive re  | 1/420 | 21/15848  | 0.431302 | 0.840563 | 0.7989   | Soc_8G000 | 1 |
| bomi vs linzhi | GO:0005576 | extracellul  | 9/420 | 311/15848 | 0.441944 | 0.840563 | 0.7989   | Soc_11G00 | 9 |
| bomi vs linzhi | GO:0005737 | cytoplasm    | 7/420 | 238/15848 | 0.443945 | 0.840563 | 0.7989   | Soc_11G00 | 7 |
| bomi vs linzhi | GO:0005520 | insulin-like | 1/420 | 22/15848  | 0.446393 | 0.840563 | 0.7989   | Soc_20G00 | 1 |
| bomi vs linzhi | GO:0005794 | Golgi appa   | 1/420 | 22/15848  | 0.446393 | 0.840563 | 0.7989   | Soc_13G00 | 1 |
| bomi vs linzhi | GO:0045892 | negative re  | 1/420 | 22/15848  | 0.446393 | 0.840563 | 0.7989   | Soc_13G00 | 1 |
| bomi vs linzhi | GO:0005085 | guanyl-nu    | 2/420 | 58/15848  | 0.457211 | 0.840563 | 0.7989   | Soc_17G00 | 2 |
| bomi vs linzhi | GO:0001558 | regulation   | 1/420 | 23/15848  | 0.461085 | 0.840563 | 0.7989   | Soc_20G00 | 1 |
| bomi vs linzhi | GO:0004129 | cytochrom    | 1/420 | 23/15848  | 0.461085 | 0.840563 | 0.7989   | Soc_9G000 | 1 |
| bomi vs linzhi | GO:0004890 | GABA-A re    | 1/420 | 23/15848  | 0.461085 | 0.840563 | 0.7989   | Soc_13G00 | 1 |
| bomi vs linzhi | GO:0008543 | fibroblast   | 1/420 | 23/15848  | 0.461085 | 0.840563 | 0.7989   | Soc_11G00 | 1 |
| bomi vs linzhi | GO:0030001 | metal ion    | 1/420 | 23/15848  | 0.461085 | 0.840563 | 0.7989   | Soc_19G00 | 1 |
| bomi vs linzhi | GO:0042613 | MHC class    | 1/420 | 23/15848  | 0.461085 | 0.840563 | 0.7989   | Soc_13G00 | 1 |
| bomi vs linzhi | GO:0006139 | nucleobas    | 1/420 | 24/15848  | 0.475388 | 0.844626 | 0.802762 | Soc_23G00 | 1 |
| bomi vs linzhi | GO:0019882 | antigen pr   | 1/420 | 24/15848  | 0.475388 | 0.844626 | 0.802762 | Soc_13G00 | 1 |
| bomi vs linzhi | GO:0003707 | steroid ho   | 2/420 | 61/15848  | 0.483446 | 0.844626 | 0.802762 | Soc_11G00 | 2 |
| bomi vs linzhi | GO:0043401 | steroid ho   | 2/420 | 61/15848  | 0.483446 | 0.844626 | 0.802762 | Soc_11G00 | 2 |
| bomi vs linzhi | GO:0004722 | protein ser  | 1/420 | 25/15848  | 0.489313 | 0.844626 | 0.802762 | Soc_11G00 | 1 |
| bomi vs linzhi | GO:0008565 | obsolete p   | 1/420 | 25/15848  | 0.489313 | 0.844626 | 0.802762 | Soc_23G00 | 1 |
| bomi vs linzhi | GO:0016055 | Wnt signa    | 2/420 | 62/15848  | 0.492015 | 0.844626 | 0.802762 | Soc_14G00 | 2 |
| bomi vs linzhi | GO:0007268 | chemical s   | 1/420 | 26/15848  | 0.502868 | 0.852682 | 0.810418 | Soc_20G00 | 1 |
| bomi vs linzhi | GO:0007264 | small GTPa   | 4/420 | 139/15848 | 0.504986 | 0.852682 | 0.810418 | Soc_12G00 | 4 |
| bomi vs linzhi | GO:0015078 | proton tra   | 1/420 | 27/15848  | 0.516065 | 0.857124 | 0.81464  | Soc_6G002 | 1 |
| bomi vs linzhi | GO:0015991 | proton tra   | 1/420 | 27/15848  | 0.516065 | 0.857124 | 0.81464  | Soc_6G002 | 1 |
| bomi vs linzhi | GO:0004252 | serine-tyr   | 4/420 | 143/15848 | 0.527312 | 0.857124 | 0.81464  | Soc_19G00 | 4 |
| bomi vs linzhi | GO:0005216 | ion channe   | 7/420 | 258/15848 | 0.528542 | 0.857124 | 0.81464  | Soc_11G00 | 7 |
| bomi vs linzhi | GO:0043547 | positive re  | 1/420 | 28/15848  | 0.528912 | 0.857124 | 0.81464  | Soc_21G00 | 1 |
| bomi vs linzhi | GO:0006096 | glycolytic   | 1/420 | 29/15848  | 0.541418 | 0.857124 | 0.81464  | Soc_18G00 | 1 |
| bomi vs linzhi | GO:0008233 | peptidase    | 1/420 | 29/15848  | 0.541418 | 0.857124 | 0.81464  | Soc_11G00 | 1 |

|                |            |             |        |           |          |          |          |           |    |
|----------------|------------|-------------|--------|-----------|----------|----------|----------|-----------|----|
| bomi vs linzhi | GO:0005578 | extracellul | 1/420  | 30/15848  | 0.553594 | 0.857124 | 0.81464  | Soc_17G00 | 1  |
| bomi vs linzhi | GO:0016887 | ATPase ac   | 2/420  | 71/15848  | 0.564959 | 0.857124 | 0.81464  | Soc_15G00 | 2  |
| bomi vs linzhi | GO:0005245 | voltage-ga  | 1/420  | 31/15848  | 0.565447 | 0.857124 | 0.81464  | Soc_11G00 | 1  |
| bomi vs linzhi | GO:0006897 | endocytos   | 1/420  | 31/15848  | 0.565447 | 0.857124 | 0.81464  | Soc_11G00 | 1  |
| bomi vs linzhi | GO:0008009 | chemokine   | 1/420  | 31/15848  | 0.565447 | 0.857124 | 0.81464  | Soc_20G00 | 1  |
| bomi vs linzhi | GO:0071805 | potassium   | 1/420  | 31/15848  | 0.565447 | 0.857124 | 0.81464  | Soc_14G00 | 1  |
| bomi vs linzhi | GO:0005179 | hormone     | 2/420  | 72/15848  | 0.572585 | 0.857124 | 0.81464  | Soc_11G00 | 2  |
| bomi vs linzhi | GO:0008092 | cytoskelet  | 1/420  | 32/15848  | 0.576986 | 0.857124 | 0.81464  | Soc_15G00 | 1  |
| bomi vs linzhi | GO:0042157 | lipoprotein | 1/420  | 32/15848  | 0.576986 | 0.857124 | 0.81464  | Soc_3G00  | 1  |
| bomi vs linzhi | GO:0016705 | oxidoredu   | 2/420  | 74/15848  | 0.587545 | 0.857124 | 0.81464  | Soc_12G00 | 2  |
| bomi vs linzhi | GO:0005886 | plasma me   | 1/420  | 33/15848  | 0.588219 | 0.857124 | 0.81464  | Soc_21G00 | 1  |
| bomi vs linzhi | GO:0016616 | oxidoredu   | 1/420  | 33/15848  | 0.588219 | 0.857124 | 0.81464  | Soc_20G00 | 1  |
| bomi vs linzhi | GO:0046983 | protein dir | 6/420  | 236/15848 | 0.598292 | 0.857124 | 0.81464  | Soc_13G00 | 6  |
| bomi vs linzhi | GO:0005891 | voltage-ga  | 1/420  | 34/15848  | 0.599155 | 0.857124 | 0.81464  | Soc_11G00 | 1  |
| bomi vs linzhi | GO:0006511 | ubiquitin-  | 1/420  | 34/15848  | 0.599155 | 0.857124 | 0.81464  | Soc_14G00 | 1  |
| bomi vs linzhi | GO:0008305 | integrin co | 1/420  | 36/15848  | 0.620165 | 0.881062 | 0.837391 | Soc_1G00  | 1  |
| bomi vs linzhi | GO:0007275 | multicellul | 2/420  | 80/15848  | 0.630077 | 0.88215  | 0.838425 | Soc_8G00  | 2  |
| bomi vs linzhi | GO:0007399 | nervous sy  | 1/420  | 37/15848  | 0.630254 | 0.88215  | 0.838425 | Soc_7G00  | 1  |
| bomi vs linzhi | GO:0006811 | ion transp  | 7/420  | 285/15848 | 0.633778 | 0.88215  | 0.838425 | Soc_11G00 | 7  |
| bomi vs linzhi | GO:0006260 | DNA replic  | 1/420  | 39/15848  | 0.649637 | 0.885119 | 0.841247 | Soc_4G00  | 1  |
| bomi vs linzhi | GO:0046872 | metal ion   | 5/420  | 210/15848 | 0.657386 | 0.885119 | 0.841247 | Soc_13G00 | 5  |
| bomi vs linzhi | GO:0003743 | translation | 1/420  | 41/15848  | 0.668007 | 0.885119 | 0.841247 | Soc_20G00 | 1  |
| bomi vs linzhi | GO:0030170 | pyridoxal   | 1/420  | 41/15848  | 0.668007 | 0.885119 | 0.841247 | Soc_22G00 | 1  |
| bomi vs linzhi | GO:0005840 | ribosome    | 2/420  | 87/15848  | 0.675292 | 0.885119 | 0.841247 | Soc_18G00 | 2  |
| bomi vs linzhi | GO:0051082 | unfolded p  | 1/420  | 42/15848  | 0.676828 | 0.885119 | 0.841247 | Soc_15G00 | 1  |
| bomi vs linzhi | GO:0006281 | DNA repair  | 2/420  | 88/15848  | 0.681371 | 0.885119 | 0.841247 | Soc_11G00 | 2  |
| bomi vs linzhi | GO:0006508 | proteolysis | 10/420 | 422/15848 | 0.685261 | 0.885119 | 0.841247 | Soc_11G00 | 10 |
| bomi vs linzhi | GO:0000166 | nucleotide  | 1/420  | 43/15848  | 0.685415 | 0.885119 | 0.841247 | Soc_17G00 | 1  |
| bomi vs linzhi | GO:0016787 | hydrolase   | 3/420  | 134/15848 | 0.693475 | 0.885119 | 0.841247 | Soc_11G00 | 3  |
| bomi vs linzhi | GO:0016758 | transferase | 1/420  | 44/15848  | 0.693775 | 0.885119 | 0.841247 | Soc_7G00  | 1  |
| bomi vs linzhi | GO:0004713 | protein tyr | 2/420  | 91/15848  | 0.699054 | 0.885119 | 0.841247 | Soc_16G00 | 2  |
| bomi vs linzhi | GO:0006412 | translation | 2/420  | 91/15848  | 0.699054 | 0.885119 | 0.841247 | Soc_18G00 | 2  |
| bomi vs linzhi | GO:0020037 | heme bind   | 2/420  | 91/15848  | 0.699054 | 0.885119 | 0.841247 | Soc_12G00 | 2  |
| bomi vs linzhi | GO:0030036 | actin cytos | 1/420  | 45/15848  | 0.701913 | 0.885119 | 0.841247 | Soc_15G00 | 1  |
| bomi vs linzhi | GO:0042626 | ATPase-cc   | 1/420  | 46/15848  | 0.709836 | 0.885119 | 0.841247 | Soc_17G00 | 1  |
| bomi vs linzhi | GO:0015074 | DNA integ   | 2/420  | 94/15848  | 0.715916 | 0.885119 | 0.841247 | Soc_1G00  | 2  |
| bomi vs linzhi | GO:0007165 | signal tran | 8/420  | 351/15848 | 0.716464 | 0.885119 | 0.841247 | Soc_11G00 | 8  |
| bomi vs linzhi | GO:0016757 | transferase | 1/420  | 47/15848  | 0.717548 | 0.885119 | 0.841247 | Soc_15G00 | 1  |

|                |            |             |       |           |          |          |          |           |   |
|----------------|------------|-------------|-------|-----------|----------|----------|----------|-----------|---|
| bomi vs linzhi | GO:0003735 | structural  | 2/420 | 97/15848  | 0.731978 | 0.890808 | 0.846654 | Soc_18G00 | 2 |
| bomi vs linzhi | GO:0004725 | protein tyr | 1/420 | 50/15848  | 0.739479 | 0.890808 | 0.846654 | Soc_12G00 | 1 |
| bomi vs linzhi | GO:0009058 | biosynthes  | 1/420 | 50/15848  | 0.739479 | 0.890808 | 0.846654 | Soc_4G00  | 1 |
| bomi vs linzhi | GO:0005102 | signaling r | 1/420 | 52/15848  | 0.753148 | 0.890808 | 0.846654 | Soc_8G00  | 1 |
| bomi vs linzhi | GO:0008234 | cysteine-t  | 1/420 | 52/15848  | 0.753148 | 0.890808 | 0.846654 | Soc_24G00 | 1 |
| bomi vs linzhi | GO:0036459 | thiol-depe  | 1/420 | 52/15848  | 0.753148 | 0.890808 | 0.846654 | Soc_11G00 | 1 |
| bomi vs linzhi | GO:0004984 | olfactory r | 1/420 | 53/15848  | 0.759711 | 0.890808 | 0.846654 | Soc_16G00 | 1 |
| bomi vs linzhi | GO:0000287 | magnesiur   | 1/420 | 54/15848  | 0.766101 | 0.890808 | 0.846654 | Soc_17G00 | 1 |
| bomi vs linzhi | GO:0007601 | visual perc | 1/420 | 54/15848  | 0.766101 | 0.890808 | 0.846654 | Soc_1G00  | 1 |
| bomi vs linzhi | GO:0004872 | signaling r | 1/420 | 55/15848  | 0.772321 | 0.890808 | 0.846654 | Soc_21G00 | 1 |
| bomi vs linzhi | GO:0070588 | calcium io  | 1/420 | 55/15848  | 0.772321 | 0.890808 | 0.846654 | Soc_11G00 | 1 |
| bomi vs linzhi | GO:0006396 | RNA proce   | 1/420 | 56/15848  | 0.778375 | 0.890808 | 0.846654 | Soc_18G00 | 1 |
| bomi vs linzhi | GO:0016301 | kinase acti | 1/420 | 56/15848  | 0.778375 | 0.890808 | 0.846654 | Soc_7G00  | 1 |
| bomi vs linzhi | GO:0008083 | growth fac  | 2/420 | 108/15848 | 0.784408 | 0.892568 | 0.848327 | Soc_11G00 | 2 |
| bomi vs linzhi | GO:0004222 | metalloen   | 2/420 | 109/15848 | 0.788698 | 0.892568 | 0.848327 | Soc_19G00 | 2 |
| bomi vs linzhi | GO:0004674 | protein se  | 2/420 | 110/15848 | 0.792912 | 0.892568 | 0.848327 | Soc_6G00  | 2 |
| bomi vs linzhi | GO:0005506 | iron ion bi | 2/420 | 114/15848 | 0.809038 | 0.905771 | 0.860876 | Soc_12G00 | 2 |
| bomi vs linzhi | GO:0016579 | protein de  | 1/420 | 63/15848  | 0.816492 | 0.909175 | 0.864111 | Soc_11G00 | 1 |
| bomi vs linzhi | GO:0005044 | scavenger   | 1/420 | 66/15848  | 0.830755 | 0.910187 | 0.865073 | Soc_24G00 | 1 |
| bomi vs linzhi | GO:0007018 | microtubu   | 1/420 | 66/15848  | 0.830755 | 0.910187 | 0.865073 | Soc_23G00 | 1 |
| bomi vs linzhi | GO:0003777 | microtubu   | 1/420 | 67/15848  | 0.835259 | 0.910187 | 0.865073 | Soc_23G00 | 1 |
| bomi vs linzhi | GO:0051015 | actin filam | 1/420 | 67/15848  | 0.835259 | 0.910187 | 0.865073 | Soc_16G00 | 1 |
| bomi vs linzhi | GO:0008237 | metallope   | 1/420 | 69/15848  | 0.843911 | 0.910187 | 0.865073 | Soc_19G00 | 1 |
| bomi vs linzhi | GO:0051260 | protein ho  | 1/420 | 69/15848  | 0.843911 | 0.910187 | 0.865073 | Soc_17G00 | 1 |
| bomi vs linzhi | GO:0006955 | immune re   | 2/420 | 127/15848 | 0.853982 | 0.914876 | 0.86953  | Soc_13G00 | 2 |
| bomi vs linzhi | GO:0016491 | oxidoredu   | 3/420 | 179/15848 | 0.857142 | 0.914876 | 0.86953  | Soc_21G00 | 3 |
| bomi vs linzhi | GO:0007156 | homophili   | 2/420 | 131/15848 | 0.865739 | 0.91929  | 0.873724 | Soc_10G00 | 2 |
| bomi vs linzhi | GO:0005887 | integral co | 2/420 | 141/15848 | 0.891432 | 0.935878 | 0.889491 | Soc_14G00 | 2 |
| bomi vs linzhi | GO:0005615 | extracellul | 1/420 | 83/15848  | 0.893028 | 0.935878 | 0.889491 | Soc_9G00  | 1 |
| bomi vs linzhi | GO:0005089 | Rho guany   | 1/420 | 84/15848  | 0.895878 | 0.935878 | 0.889491 | Soc_9G00  | 1 |
| bomi vs linzhi | GO:0005096 | GTPase ac   | 1/420 | 88/15848  | 0.906539 | 0.935878 | 0.889491 | Soc_1G00  | 1 |
| bomi vs linzhi | GO:0035023 | regulation  | 1/420 | 88/15848  | 0.906539 | 0.935878 | 0.889491 | Soc_9G00  | 1 |
| bomi vs linzhi | GO:0007155 | cell adhesi | 2/420 | 149/15848 | 0.90862  | 0.935878 | 0.889491 | Soc_15G00 | 2 |
| bomi vs linzhi | GO:0055114 | oxidation-  | 7/420 | 413/15848 | 0.924557 | 0.947556 | 0.900589 | Soc_12G00 | 7 |
| bomi vs linzhi | GO:0003779 | actin bindi | 1/420 | 105/15848 | 0.940966 | 0.955095 | 0.907755 | Soc_15G00 | 1 |
| bomi vs linzhi | GO:0008152 | metabolic   | 3/420 | 226/15848 | 0.941185 | 0.955095 | 0.907755 | Soc_13G00 | 3 |
| bomi vs linzhi | GO:0006886 | intracellul | 1/420 | 115/15848 | 0.954957 | 0.964319 | 0.916522 | Soc_1G00  | 1 |
| bomi vs linzhi | GO:0003924 | GTPase ac   | 4/420 | 314/15848 | 0.968784 | 0.97351  | 0.925257 | Soc_12G00 | 4 |

|                |            |               |        |           |          |          |          |           |    |
|----------------|------------|---------------|--------|-----------|----------|----------|----------|-----------|----|
| bomi vs linzhi | GO:0035556 | intracellular | 1/420  | 170/15848 | 0.989857 | 0.989857 | 0.940794 | Soc_8G000 | 1  |
| bomi vs zangga | GO:0008417 | fucosyltran   | 4/424  | 13/15848  | 0.000298 | 0.0339   | 0.033371 | Soc_13G00 | 4  |
| bomi vs zangga | GO:0000786 | nucleosom     | 12/424 | 137/15848 | 0.000314 | 0.0339   | 0.033371 | Soc_20G00 | 12 |
| bomi vs zangga | GO:0005200 | structural    | 4/424  | 27/15848  | 0.005443 | 0.391893 | 0.385782 | Soc_15G00 | 4  |
| bomi vs zangga | GO:0045211 | postsynap     | 4/424  | 31/15848  | 0.008974 | 0.43389  | 0.427124 | Soc_18G00 | 4  |
| bomi vs zangga | GO:0007017 | microtubu     | 4/424  | 32/15848  | 0.010044 | 0.43389  | 0.427124 | Soc_15G00 | 4  |
| bomi vs zangga | GO:0008137 | NADH def      | 2/424  | 10/15848  | 0.027877 | 0.624073 | 0.614341 | Soc_13G00 | 2  |
| bomi vs zangga | GO:0030971 | receptor t    | 2/424  | 10/15848  | 0.027877 | 0.624073 | 0.614341 | Soc_15G00 | 2  |
| bomi vs zangga | GO:0006486 | protein gly   | 6/424  | 87/15848  | 0.029095 | 0.624073 | 0.614341 | Soc_10G00 | 6  |
| bomi vs zangga | GO:0005874 | microtubu     | 4/424  | 45/15848  | 0.031775 | 0.624073 | 0.614341 | Soc_15G00 | 4  |
| bomi vs zangga | GO:0006334 | nucleosom     | 4/424  | 48/15848  | 0.039012 | 0.624073 | 0.614341 | Soc_3G000 | 4  |
| bomi vs zangga | GO:1902476 | chloride tr   | 2/424  | 12/15848  | 0.039475 | 0.624073 | 0.614341 | Soc_24G00 | 2  |
| bomi vs zangga | GO:0005230 | extracellul   | 5/424  | 71/15848  | 0.041363 | 0.624073 | 0.614341 | Soc_13G00 | 5  |
| bomi vs zangga | GO:0016705 | oxidoredu     | 5/424  | 74/15848  | 0.048018 | 0.624073 | 0.614341 | Soc_12G00 | 5  |
| bomi vs zangga | GO:0005245 | voltage-g     | 3/424  | 31/15848  | 0.049168 | 0.624073 | 0.614341 | Soc_11G00 | 3  |
| bomi vs zangga | GO:0048015 | phosphati     | 2/424  | 14/15848  | 0.052557 | 0.624073 | 0.614341 | Soc_1G000 | 2  |
| bomi vs zangga | GO:0055114 | oxidation-    | 17/424 | 413/15848 | 0.052865 | 0.624073 | 0.614341 | Soc_10G00 | 17 |
| bomi vs zangga | GO:0042981 | regulation    | 5/424  | 77/15848  | 0.055271 | 0.624073 | 0.614341 | Soc_1G000 | 5  |
| bomi vs zangga | GO:0006935 | chemotaxi     | 3/424  | 33/15848  | 0.057417 | 0.624073 | 0.614341 | Soc_14G00 | 3  |
| bomi vs zangga | GO:0070588 | calcium io    | 4/424  | 55/15848  | 0.059254 | 0.624073 | 0.614341 | Soc_11G00 | 4  |
| bomi vs zangga | GO:0005891 | voltage-g     | 3/424  | 34/15848  | 0.061771 | 0.624073 | 0.614341 | Soc_11G00 | 3  |
| bomi vs zangga | GO:0007596 | blood coa     | 2/424  | 16/15848  | 0.066935 | 0.624073 | 0.614341 | Soc_24G00 | 2  |
| bomi vs zangga | GO:0016192 | vesicle-me    | 5/424  | 82/15848  | 0.068686 | 0.624073 | 0.614341 | Soc_12G00 | 5  |
| bomi vs zangga | GO:0034220 | ion trans     | 5/424  | 82/15848  | 0.068686 | 0.624073 | 0.614341 | Soc_13G00 | 5  |
| bomi vs zangga | GO:0005615 | extracellul   | 5/424  | 83/15848  | 0.071567 | 0.624073 | 0.614341 | Soc_12G00 | 5  |
| bomi vs zangga | GO:0005215 | transporte    | 3/424  | 37/15848  | 0.075715 | 0.624073 | 0.614341 | Soc_3G000 | 3  |
| bomi vs zangga | GO:0046854 | phosphati     | 2/424  | 18/15848  | 0.082436 | 0.624073 | 0.614341 | Soc_1G000 | 2  |
| bomi vs zangga | GO:0016055 | Wnt signa     | 4/424  | 62/15848  | 0.084082 | 0.624073 | 0.614341 | Soc_18G00 | 4  |
| bomi vs zangga | GO:0005506 | iron ion bi   | 6/424  | 114/15848 | 0.085542 | 0.624073 | 0.614341 | Soc_12G00 | 6  |
| bomi vs zangga | GO:0006260 | DNA replic    | 3/424  | 39/15848  | 0.085711 | 0.624073 | 0.614341 | Soc_13G00 | 3  |
| bomi vs zangga | GO:0035556 | intracellular | 8/424  | 170/15848 | 0.086677 | 0.624073 | 0.614341 | Soc_13G00 | 8  |
| bomi vs zangga | GO:0020037 | heme bind     | 5/424  | 91/15848  | 0.096939 | 0.667598 | 0.657187 | Soc_12G00 | 5  |
| bomi vs zangga | GO:0006352 | DNA-tem       | 2/424  | 20/15848  | 0.098903 | 0.667598 | 0.657187 | Soc_18G00 | 2  |
| bomi vs zangga | GO:0006816 | calcium io    | 3/424  | 43/15848  | 0.107251 | 0.702009 | 0.691061 | Soc_8G000 | 3  |
| bomi vs zangga | GO:0042613 | MHC class     | 2/424  | 23/15848  | 0.125101 | 0.73689  | 0.725399 | Soc_13G00 | 2  |
| bomi vs zangga | GO:0019882 | antigen pr    | 2/424  | 24/15848  | 0.134168 | 0.73689  | 0.725399 | Soc_13G00 | 2  |
| bomi vs zangga | GO:0004725 | protein tyr   | 3/424  | 50/15848  | 0.149259 | 0.73689  | 0.725399 | Soc_15G00 | 3  |
| bomi vs zangga | GO:0004888 | transmem      | 7/424  | 165/15848 | 0.154398 | 0.73689  | 0.725399 | Soc_13G00 | 7  |

|                |            |              |       |           |          |         |          |           |   |
|----------------|------------|--------------|-------|-----------|----------|---------|----------|-----------|---|
| bomi vs zangga | GO:0016791 | phosphata    | 5/424 | 106/15848 | 0.15481  | 0.73689 | 0.725399 | Soc_11G00 | 5 |
| bomi vs zangga | GO:0008168 | methyltran   | 3/424 | 51/15848  | 0.155643 | 0.73689 | 0.725399 | Soc_15G00 | 3 |
| bomi vs zangga | GO:0008234 | cysteine-t   | 3/424 | 52/15848  | 0.16211  | 0.73689 | 0.725399 | Soc_23G00 | 3 |
| bomi vs zangga | GO:0036459 | thiol-depe   | 3/424 | 52/15848  | 0.16211  | 0.73689 | 0.725399 | Soc_18G00 | 3 |
| bomi vs zangga | GO:0009055 | electron tr  | 2/424 | 27/15848  | 0.162163 | 0.73689 | 0.725399 | Soc_13G00 | 2 |
| bomi vs zangga | GO:0004222 | metalloent   | 5/424 | 109/15848 | 0.167807 | 0.73689 | 0.725399 | Soc_13G00 | 5 |
| bomi vs zangga | GO:0007601 | visual perc  | 3/424 | 54/15848  | 0.17528  | 0.73689 | 0.725399 | Soc_2G000 | 3 |
| bomi vs zangga | GO:0009190 | cyclic nucl  | 2/424 | 30/15848  | 0.191078 | 0.73689 | 0.725399 | Soc_15G00 | 2 |
| bomi vs zangga | GO:0016849 | phosphori    | 2/424 | 30/15848  | 0.191078 | 0.73689 | 0.725399 | Soc_15G00 | 2 |
| bomi vs zangga | GO:0016702 | oxidoredu    | 2/424 | 31/15848  | 0.200864 | 0.73689 | 0.725399 | Soc_13G00 | 2 |
| bomi vs zangga | GO:0071805 | potassium    | 2/424 | 31/15848  | 0.200864 | 0.73689 | 0.725399 | Soc_16G00 | 2 |
| bomi vs zangga | GO:0008289 | lipid bindi  | 4/424 | 88/15848  | 0.209569 | 0.73689 | 0.725399 | Soc_1G000 | 4 |
| bomi vs zangga | GO:0005267 | potassium    | 2/424 | 32/15848  | 0.210708 | 0.73689 | 0.725399 | Soc_16G00 | 2 |
| bomi vs zangga | GO:0042157 | lipoprotein  | 2/424 | 32/15848  | 0.210708 | 0.73689 | 0.725399 | Soc_1G000 | 2 |
| bomi vs zangga | GO:0003707 | steroid ho   | 3/424 | 61/15848  | 0.223416 | 0.73689 | 0.725399 | Soc_13G00 | 3 |
| bomi vs zangga | GO:0043401 | steroid ho   | 3/424 | 61/15848  | 0.223416 | 0.73689 | 0.725399 | Soc_13G00 | 3 |
| bomi vs zangga | GO:0005667 | transcripti  | 2/424 | 34/15848  | 0.230524 | 0.73689 | 0.725399 | Soc_21G00 | 2 |
| bomi vs zangga | GO:0006470 | protein de   | 5/424 | 123/15848 | 0.233426 | 0.73689 | 0.725399 | Soc_11G00 | 5 |
| bomi vs zangga | GO:0004383 | guanylate    | 1/424 | 10/15848  | 0.237585 | 0.73689 | 0.725399 | Soc_3G000 | 1 |
| bomi vs zangga | GO:0004571 | mannosyl-    | 1/424 | 10/15848  | 0.237585 | 0.73689 | 0.725399 | Soc_6G000 | 1 |
| bomi vs zangga | GO:0005764 | lysosome     | 1/424 | 10/15848  | 0.237585 | 0.73689 | 0.725399 | Soc_18G00 | 1 |
| bomi vs zangga | GO:0006182 | cGMP bios    | 1/424 | 10/15848  | 0.237585 | 0.73689 | 0.725399 | Soc_3G000 | 1 |
| bomi vs zangga | GO:0006694 | steroid bic  | 1/424 | 10/15848  | 0.237585 | 0.73689 | 0.725399 | Soc_1G000 | 1 |
| bomi vs zangga | GO:0016712 | oxidoredu    | 1/424 | 10/15848  | 0.237585 | 0.73689 | 0.725399 | Soc_20G00 | 1 |
| bomi vs zangga | GO:0016579 | protein de   | 3/424 | 63/15848  | 0.237626 | 0.73689 | 0.725399 | Soc_18G00 | 3 |
| bomi vs zangga | GO:0008373 | sialyltransf | 2/424 | 36/15848  | 0.250452 | 0.73689 | 0.725399 | Soc_10G00 | 2 |
| bomi vs zangga | GO:0008017 | microtubu    | 4/424 | 96/15848  | 0.255544 | 0.73689 | 0.725399 | Soc_3G000 | 4 |
| bomi vs zangga | GO:0005247 | voltage-g    | 1/424 | 11/15848  | 0.257995 | 0.73689 | 0.725399 | Soc_16G00 | 1 |
| bomi vs zangga | GO:0007224 | smoother     | 1/424 | 11/15848  | 0.257995 | 0.73689 | 0.725399 | Soc_22G00 | 1 |
| bomi vs zangga | GO:0044212 | transcripti  | 1/424 | 11/15848  | 0.257995 | 0.73689 | 0.725399 | Soc_11G00 | 1 |
| bomi vs zangga | GO:0008146 | sulfotransf  | 3/424 | 66/15848  | 0.259214 | 0.73689 | 0.725399 | Soc_13G00 | 3 |
| bomi vs zangga | GO:0016311 | dephosph     | 4/424 | 98/15848  | 0.267353 | 0.73689 | 0.725399 | Soc_11G00 | 4 |
| bomi vs zangga | GO:0004707 | MAP kinas    | 1/424 | 12/15848  | 0.277861 | 0.73689 | 0.725399 | Soc_18G00 | 1 |
| bomi vs zangga | GO:0007179 | transformi   | 1/424 | 12/15848  | 0.277861 | 0.73689 | 0.725399 | Soc_21G00 | 1 |
| bomi vs zangga | GO:0009116 | nucleoside   | 1/424 | 12/15848  | 0.277861 | 0.73689 | 0.725399 | Soc_6G000 | 1 |
| bomi vs zangga | GO:0030117 | membrane     | 1/424 | 12/15848  | 0.277861 | 0.73689 | 0.725399 | Soc_24G00 | 1 |
| bomi vs zangga | GO:0030833 | regulation   | 1/424 | 12/15848  | 0.277861 | 0.73689 | 0.725399 | Soc_7G000 | 1 |
| bomi vs zangga | GO:0008237 | metallope    | 3/424 | 69/15848  | 0.281045 | 0.73689 | 0.725399 | Soc_13G00 | 3 |

|                |            |             |        |           |          |          |          |           |    |
|----------------|------------|-------------|--------|-----------|----------|----------|----------|-----------|----|
| bomi vs zangga | GO:0016459 | myosin co   | 3/424  | 70/15848  | 0.288361 | 0.73689  | 0.725399 | Soc_10G00 | 3  |
| bomi vs zangga | GO:0007049 | cell cycle  | 2/424  | 40/15848  | 0.290384 | 0.73689  | 0.725399 | Soc_10G00 | 2  |
| bomi vs zangga | GO:0003774 | motor acti  | 3/424  | 71/15848  | 0.295691 | 0.73689  | 0.725399 | Soc_10G00 | 3  |
| bomi vs zangga | GO:0003723 | RNA bindi   | 7/424  | 202/15848 | 0.297096 | 0.73689  | 0.725399 | Soc_10G00 | 7  |
| bomi vs zangga | GO:0004620 | phospholi   | 1/424  | 13/15848  | 0.297196 | 0.73689  | 0.725399 | Soc_5G000 | 1  |
| bomi vs zangga | GO:0006950 | response t  | 1/424  | 13/15848  | 0.297196 | 0.73689  | 0.725399 | Soc_24G00 | 1  |
| bomi vs zangga | GO:0008271 | secondary   | 1/424  | 13/15848  | 0.297196 | 0.73689  | 0.725399 | Soc_15G00 | 1  |
| bomi vs zangga | GO:0008272 | sulfate tra | 1/424  | 13/15848  | 0.297196 | 0.73689  | 0.725399 | Soc_15G00 | 1  |
| bomi vs zangga | GO:0009395 | phospholi   | 1/424  | 13/15848  | 0.297196 | 0.73689  | 0.725399 | Soc_5G000 | 1  |
| bomi vs zangga | GO:0015116 | sulfate tra | 1/424  | 13/15848  | 0.297196 | 0.73689  | 0.725399 | Soc_15G00 | 1  |
| bomi vs zangga | GO:0042813 | Wnt-activ   | 1/424  | 13/15848  | 0.297196 | 0.73689  | 0.725399 | Soc_4G000 | 1  |
| bomi vs zangga | GO:0046983 | protein dir | 8/424  | 236/15848 | 0.298122 | 0.73689  | 0.725399 | Soc_11G00 | 8  |
| bomi vs zangga | GO:0000981 | DNA-bind    | 1/424  | 14/15848  | 0.316014 | 0.73689  | 0.725399 | Soc_22G00 | 1  |
| bomi vs zangga | GO:0005158 | insulin rec | 1/424  | 14/15848  | 0.316014 | 0.73689  | 0.725399 | Soc_3G000 | 1  |
| bomi vs zangga | GO:0005730 | nucleolus   | 1/424  | 14/15848  | 0.316014 | 0.73689  | 0.725399 | Soc_5G000 | 1  |
| bomi vs zangga | GO:0046872 | metal ion   | 7/424  | 210/15848 | 0.331377 | 0.73689  | 0.725399 | Soc_13G00 | 7  |
| bomi vs zangga | GO:0003924 | GTPase ac   | 10/424 | 314/15848 | 0.332294 | 0.73689  | 0.725399 | Soc_10G00 | 10 |
| bomi vs zangga | GO:0001614 | purinergic  | 1/424  | 15/15848  | 0.33433  | 0.73689  | 0.725399 | Soc_3G000 | 1  |
| bomi vs zangga | GO:0003729 | mRNA bin    | 1/424  | 15/15848  | 0.33433  | 0.73689  | 0.725399 | Soc_10G00 | 1  |
| bomi vs zangga | GO:0004931 | extracellul | 1/424  | 15/15848  | 0.33433  | 0.73689  | 0.725399 | Soc_3G000 | 1  |
| bomi vs zangga | GO:0006289 | nucleotide  | 1/424  | 15/15848  | 0.33433  | 0.73689  | 0.725399 | Soc_20G00 | 1  |
| bomi vs zangga | GO:0007411 | axon guid   | 1/424  | 15/15848  | 0.33433  | 0.73689  | 0.725399 | Soc_22G00 | 1  |
| bomi vs zangga | GO:0033198 | response t  | 1/424  | 15/15848  | 0.33433  | 0.73689  | 0.725399 | Soc_3G000 | 1  |
| bomi vs zangga | GO:0016491 | oxidoredu   | 6/424  | 179/15848 | 0.346315 | 0.742414 | 0.730837 | Soc_10G00 | 6  |
| bomi vs zangga | GO:0004867 | serine-tyr  | 2/424  | 46/15848  | 0.349658 | 0.742414 | 0.730837 | Soc_24G00 | 2  |
| bomi vs zangga | GO:0005885 | Arp2/3 pr   | 1/424  | 16/15848  | 0.352156 | 0.742414 | 0.730837 | Soc_7G000 | 1  |
| bomi vs zangga | GO:0008324 | cation tra  | 1/424  | 16/15848  | 0.352156 | 0.742414 | 0.730837 | Soc_9G000 | 1  |
| bomi vs zangga | GO:0006811 | ion transp  | 9/424  | 285/15848 | 0.354022 | 0.742414 | 0.730837 | Soc_11G00 | 9  |
| bomi vs zangga | GO:0006869 | lipid trans | 2/424  | 47/15848  | 0.359391 | 0.742868 | 0.731283 | Soc_1G000 | 2  |
| bomi vs zangga | GO:0006520 | cellular an | 1/424  | 17/15848  | 0.369506 | 0.742868 | 0.731283 | Soc_17G00 | 1  |
| bomi vs zangga | GO:0034314 | Arp2/3 co   | 1/424  | 17/15848  | 0.369506 | 0.742868 | 0.731283 | Soc_7G000 | 1  |
| bomi vs zangga | GO:0042254 | ribosome    | 1/424  | 17/15848  | 0.369506 | 0.742868 | 0.731283 | Soc_5G000 | 1  |
| bomi vs zangga | GO:0003684 | damaged     | 1/424  | 18/15848  | 0.386393 | 0.742868 | 0.731283 | Soc_20G00 | 1  |
| bomi vs zangga | GO:0005089 | Rho guany   | 3/424  | 84/15848  | 0.390998 | 0.742868 | 0.731283 | Soc_15G00 | 3  |
| bomi vs zangga | GO:0003333 | amino acid  | 1/424  | 19/15848  | 0.402828 | 0.742868 | 0.731283 | Soc_13G00 | 1  |
| bomi vs zangga | GO:0005201 | extracellul | 1/424  | 19/15848  | 0.402828 | 0.742868 | 0.731283 | Soc_2G000 | 1  |
| bomi vs zangga | GO:0015171 | amino acid  | 1/424  | 19/15848  | 0.402828 | 0.742868 | 0.731283 | Soc_13G00 | 1  |
| bomi vs zangga | GO:0043065 | positive re | 1/424  | 19/15848  | 0.402828 | 0.742868 | 0.731283 | Soc_5G000 | 1  |

|                |            |              |        |           |          |          |          |           |    |
|----------------|------------|--------------|--------|-----------|----------|----------|----------|-----------|----|
| bomi vs zangga | GO:0098655 | cation tran  | 1/424  | 19/15848  | 0.402828 | 0.742868 | 0.731283 | Soc_3G00  | 1  |
| bomi vs zangga | GO:0035091 | phosphati    | 2/424  | 53/15848  | 0.416526 | 0.742868 | 0.731283 | Soc_11G00 | 2  |
| bomi vs zangga | GO:0003887 | DNA-direc    | 1/424  | 20/15848  | 0.418824 | 0.742868 | 0.731283 | Soc_13G00 | 1  |
| bomi vs zangga | GO:0005104 | fibroblast   | 1/424  | 20/15848  | 0.418824 | 0.742868 | 0.731283 | Soc_11G00 | 1  |
| bomi vs zangga | GO:0098609 | cell-cell ad | 1/424  | 20/15848  | 0.418824 | 0.742868 | 0.731283 | Soc_11G00 | 1  |
| bomi vs zangga | GO:0035023 | regulation   | 3/424  | 88/15848  | 0.419827 | 0.742868 | 0.731283 | Soc_15G00 | 3  |
| bomi vs zangga | GO:0005540 | hyaluronic   | 1/424  | 21/15848  | 0.434392 | 0.742868 | 0.731283 | Soc_2G00  | 1  |
| bomi vs zangga | GO:0006338 | chromatin    | 1/424  | 21/15848  | 0.434392 | 0.742868 | 0.731283 | Soc_8G00  | 1  |
| bomi vs zangga | GO:0015629 | actin cytos  | 1/424  | 21/15848  | 0.434392 | 0.742868 | 0.731283 | Soc_7G00  | 1  |
| bomi vs zangga | GO:0043087 | regulation   | 1/424  | 21/15848  | 0.434392 | 0.742868 | 0.731283 | Soc_5G00  | 1  |
| bomi vs zangga | GO:0006955 | immune re    | 4/424  | 127/15848 | 0.442663 | 0.742868 | 0.731283 | Soc_13G00 | 4  |
| bomi vs zangga | GO:0006396 | RNA proce    | 2/424  | 56/15848  | 0.444127 | 0.742868 | 0.731283 | Soc_13G00 | 2  |
| bomi vs zangga | GO:0004866 | endopepti    | 1/424  | 22/15848  | 0.449545 | 0.742868 | 0.731283 | Soc_12G00 | 1  |
| bomi vs zangga | GO:0005739 | mitochond    | 2/424  | 57/15848  | 0.453166 | 0.742868 | 0.731283 | Soc_4G00  | 2  |
| bomi vs zangga | GO:0008138 | protein tyr  | 2/424  | 58/15848  | 0.46212  | 0.742868 | 0.731283 | Soc_11G00 | 2  |
| bomi vs zangga | GO:0004129 | cytochrom    | 1/424  | 23/15848  | 0.464292 | 0.742868 | 0.731283 | Soc_8G00  | 1  |
| bomi vs zangga | GO:0004298 | threonine-   | 1/424  | 23/15848  | 0.464292 | 0.742868 | 0.731283 | Soc_8G00  | 1  |
| bomi vs zangga | GO:0004890 | GABA-A re    | 1/424  | 23/15848  | 0.464292 | 0.742868 | 0.731283 | Soc_13G00 | 1  |
| bomi vs zangga | GO:0005839 | proteasom    | 1/424  | 23/15848  | 0.464292 | 0.742868 | 0.731283 | Soc_8G00  | 1  |
| bomi vs zangga | GO:0008543 | fibroblast   | 1/424  | 23/15848  | 0.464292 | 0.742868 | 0.731283 | Soc_11G00 | 1  |
| bomi vs zangga | GO:0030001 | metal ion    | 1/424  | 23/15848  | 0.464292 | 0.742868 | 0.731283 | Soc_3G00  | 1  |
| bomi vs zangga | GO:0051603 | proteolysis  | 1/424  | 23/15848  | 0.464292 | 0.742868 | 0.731283 | Soc_8G00  | 1  |
| bomi vs zangga | GO:0006139 | nucleobas    | 1/424  | 24/15848  | 0.478645 | 0.760035 | 0.748182 | Soc_6G00  | 1  |
| bomi vs zangga | GO:0016787 | hydrolase    | 4/424  | 134/15848 | 0.483806 | 0.760035 | 0.748182 | Soc_10G00 | 4  |
| bomi vs zangga | GO:0006821 | chloride tr  | 1/424  | 25/15848  | 0.492615 | 0.760035 | 0.748182 | Soc_16G00 | 1  |
| bomi vs zangga | GO:0007010 | cytoskelet   | 1/424  | 25/15848  | 0.492615 | 0.760035 | 0.748182 | Soc_23G00 | 1  |
| bomi vs zangga | GO:0022848 | acetylcholi  | 1/424  | 25/15848  | 0.492615 | 0.760035 | 0.748182 | Soc_4G00  | 1  |
| bomi vs zangga | GO:0004197 | cysteine-t   | 1/424  | 26/15848  | 0.506211 | 0.760428 | 0.74857  | Soc_23G00 | 1  |
| bomi vs zangga | GO:0007160 | cell-matrix  | 1/424  | 26/15848  | 0.506211 | 0.760428 | 0.74857  | Soc_24G00 | 1  |
| bomi vs zangga | GO:0007268 | chemical s   | 1/424  | 26/15848  | 0.506211 | 0.760428 | 0.74857  | Soc_21G00 | 1  |
| bomi vs zangga | GO:0003700 | DNA-bind     | 13/424 | 476/15848 | 0.509827 | 0.760428 | 0.74857  | Soc_11G00 | 13 |
| bomi vs zangga | GO:0005328 | neurotrans   | 1/424  | 27/15848  | 0.519444 | 0.760428 | 0.74857  | Soc_22G00 | 1  |
| bomi vs zangga | GO:0005044 | scavenger    | 2/424  | 66/15848  | 0.530512 | 0.760428 | 0.74857  | Soc_24G00 | 2  |
| bomi vs zangga | GO:0003950 | NAD+ AD      | 1/424  | 28/15848  | 0.532323 | 0.760428 | 0.74857  | Soc_7G00  | 1  |
| bomi vs zangga | GO:0008285 | negative re  | 1/424  | 28/15848  | 0.532323 | 0.760428 | 0.74857  | Soc_5G00  | 1  |
| bomi vs zangga | GO:0043547 | positive re  | 1/424  | 28/15848  | 0.532323 | 0.760428 | 0.74857  | Soc_18G00 | 1  |
| bomi vs zangga | GO:0004842 | ubiquitin-   | 3/424  | 105/15848 | 0.535971 | 0.760428 | 0.74857  | Soc_1G00  | 3  |
| bomi vs zangga | GO:0005216 | ion channel  | 7/424  | 258/15848 | 0.538625 | 0.760428 | 0.74857  | Soc_11G00 | 7  |

|                |            |              |       |           |          |          |          |           |   |
|----------------|------------|--------------|-------|-----------|----------|----------|----------|-----------|---|
| bomi vs zangga | GO:0003777 | microtubu    | 2/424 | 67/15848  | 0.538637 | 0.760428 | 0.74857  | Soc_3G00  | 2 |
| bomi vs zangga | GO:0051015 | actin filam  | 2/424 | 67/15848  | 0.538637 | 0.760428 | 0.74857  | Soc_23G00 | 2 |
| bomi vs zangga | GO:0000226 | microtubu    | 1/424 | 30/15848  | 0.557056 | 0.768055 | 0.756077 | Soc_22G00 | 1 |
| bomi vs zangga | GO:0005578 | extracellul  | 1/424 | 30/15848  | 0.557056 | 0.768055 | 0.756077 | Soc_10G00 | 1 |
| bomi vs zangga | GO:0006464 | cellular pro | 1/424 | 30/15848  | 0.557056 | 0.768055 | 0.756077 | Soc_5G000 | 1 |
| bomi vs zangga | GO:0008152 | metabolic    | 6/424 | 226/15848 | 0.565199 | 0.768055 | 0.756077 | Soc_10G00 | 6 |
| bomi vs zangga | GO:0008009 | chemokine    | 1/424 | 31/15848  | 0.568929 | 0.768055 | 0.756077 | Soc_4G000 | 1 |
| bomi vs zangga | GO:0016746 | transferase  | 1/424 | 31/15848  | 0.568929 | 0.768055 | 0.756077 | Soc_18G00 | 1 |
| bomi vs zangga | GO:0051726 | regulation   | 1/424 | 31/15848  | 0.568929 | 0.768055 | 0.756077 | Soc_15G00 | 1 |
| bomi vs zangga | GO:0006457 | protein fol  | 1/424 | 32/15848  | 0.580485 | 0.776435 | 0.764327 | Soc_1G002 | 1 |
| bomi vs zangga | GO:0043565 | sequence-    | 5/424 | 191/15848 | 0.582326 | 0.776435 | 0.764327 | Soc_13G00 | 5 |
| bomi vs zangga | GO:0005886 | plasma me    | 1/424 | 33/15848  | 0.591731 | 0.779354 | 0.7672   | Soc_15G00 | 1 |
| bomi vs zangga | GO:0016616 | oxidoredu    | 1/424 | 33/15848  | 0.591731 | 0.779354 | 0.7672   | Soc_1G000 | 1 |
| bomi vs zangga | GO:0006887 | exocytosis   | 1/424 | 34/15848  | 0.602677 | 0.788959 | 0.776656 | Soc_18G00 | 1 |
| bomi vs zangga | GO:0006836 | neurotrans   | 1/424 | 36/15848  | 0.623698 | 0.806699 | 0.794119 | Soc_22G00 | 1 |
| bomi vs zangga | GO:0015031 | protein tra  | 1/424 | 36/15848  | 0.623698 | 0.806699 | 0.794119 | Soc_24G00 | 1 |
| bomi vs zangga | GO:0005783 | endoplasm    | 1/424 | 39/15848  | 0.653167 | 0.835914 | 0.822879 | Soc_13G00 | 1 |
| bomi vs zangga | GO:0006813 | potassium    | 3/424 | 125/15848 | 0.654026 | 0.835914 | 0.822879 | Soc_11G00 | 3 |
| bomi vs zangga | GO:0006812 | cation tran  | 1/424 | 40/15848  | 0.662469 | 0.837672 | 0.824609 | Soc_9G000 | 1 |
| bomi vs zangga | GO:0030170 | pyridoxal p  | 1/424 | 41/15848  | 0.671522 | 0.837672 | 0.824609 | Soc_12G00 | 1 |
| bomi vs zangga | GO:0007166 | cell surfac  | 2/424 | 86/15848  | 0.674213 | 0.837672 | 0.824609 | Soc_13G00 | 2 |
| bomi vs zangga | GO:0051082 | unfolded p   | 1/424 | 42/15848  | 0.680333 | 0.837672 | 0.824609 | Soc_1G002 | 1 |
| bomi vs zangga | GO:0005882 | intermedia   | 2/424 | 87/15848  | 0.680367 | 0.837672 | 0.824609 | Soc_18G00 | 2 |
| bomi vs zangga | GO:0005096 | GTPase ac    | 2/424 | 88/15848  | 0.686426 | 0.837672 | 0.824609 | Soc_18G00 | 2 |
| bomi vs zangga | GO:0006281 | DNA repair   | 2/424 | 88/15848  | 0.686426 | 0.837672 | 0.824609 | Soc_8G000 | 2 |
| bomi vs zangga | GO:0022857 | transmem     | 2/424 | 88/15848  | 0.686426 | 0.837672 | 0.824609 | Soc_18G00 | 2 |
| bomi vs zangga | GO:0016758 | transferase  | 1/424 | 44/15848  | 0.697254 | 0.846106 | 0.832911 | Soc_23G00 | 1 |
| bomi vs zangga | GO:0015074 | DNA integ    | 2/424 | 94/15848  | 0.720822 | 0.869819 | 0.856255 | Soc_2G000 | 2 |
| bomi vs zangga | GO:0005576 | extracellul  | 7/424 | 311/15848 | 0.730296 | 0.873332 | 0.859713 | Soc_11G00 | 7 |
| bomi vs zangga | GO:0005887 | integral co  | 3/424 | 141/15848 | 0.73182  | 0.873332 | 0.859713 | Soc_22G00 | 3 |
| bomi vs zangga | GO:0009058 | biosynthes   | 1/424 | 50/15848  | 0.74284  | 0.881613 | 0.867864 | Soc_12G00 | 1 |
| bomi vs zangga | GO:0005622 | intracellula | 9/424 | 400/15848 | 0.747274 | 0.882028 | 0.868273 | Soc_11G00 | 9 |
| bomi vs zangga | GO:0005102 | signaling r  | 1/424 | 52/15848  | 0.756459 | 0.888017 | 0.874169 | Soc_8G000 | 1 |
| bomi vs zangga | GO:0006351 | transcripti  | 1/424 | 53/15848  | 0.762996 | 0.888671 | 0.874812 | Soc_15G00 | 1 |
| bomi vs zangga | GO:0005737 | cytoplasm    | 5/424 | 238/15848 | 0.766995 | 0.888671 | 0.874812 | Soc_15G00 | 5 |
| bomi vs zangga | GO:0045454 | cell redox   | 1/424 | 54/15848  | 0.769359 | 0.888671 | 0.874812 | Soc_20G00 | 1 |
| bomi vs zangga | GO:0004872 | signaling r  | 1/424 | 55/15848  | 0.77555  | 0.890704 | 0.876814 | Soc_18G00 | 1 |
| bomi vs zangga | GO:0016301 | kinase acti  | 1/424 | 56/15848  | 0.781576 | 0.890704 | 0.876814 | Soc_1G000 | 1 |



|                 |            |              |        |           |          |          |          |           |    |
|-----------------|------------|--------------|--------|-----------|----------|----------|----------|-----------|----|
| bomi vs zangga  | GO:0005975 | carbohydr    | 2/424  | 107/15848 | 0.784519 | 0.890704 | 0.876814 | Soc_8G000 | 2  |
| bomi vs zangga  | GO:0008083 | growth fac   | 2/424  | 108/15848 | 0.788848 | 0.890704 | 0.876814 | Soc_11G00 | 2  |
| bomi vs zangga  | GO:0005085 | guanyl-nu    | 1/424  | 58/15848  | 0.793148 | 0.890704 | 0.876814 | Soc_18G00 | 1  |
| bomi vs zangga  | GO:0004674 | protein se   | 2/424  | 110/15848 | 0.797277 | 0.890704 | 0.876814 | Soc_12G00 | 2  |
| bomi vs zangga  | GO:0006508 | proteolysis  | 9/424  | 422/15848 | 0.80003  | 0.890704 | 0.876814 | Soc_13G00 | 9  |
| bomi vs zangga  | GO:0006915 | apoptotic    | 1/424  | 60/15848  | 0.804108 | 0.890704 | 0.876814 | Soc_8G000 | 1  |
| bomi vs zangga  | GO:0008076 | voltage-ga   | 1/424  | 61/15848  | 0.809369 | 0.891958 | 0.878048 | Soc_11G00 | 1  |
| bomi vs zangga  | GO:0006886 | intracellul  | 2/424  | 115/15848 | 0.817059 | 0.895862 | 0.881891 | Soc_1G000 | 2  |
| bomi vs zangga  | GO:0016567 | protein ub   | 1/424  | 64/15848  | 0.824321 | 0.899259 | 0.885235 | Soc_4G000 | 1  |
| bomi vs zangga  | GO:0007018 | microtubu    | 1/424  | 66/15848  | 0.833633 | 0.904847 | 0.890737 | Soc_7G000 | 1  |
| bomi vs zangga  | GO:0051260 | protein ho   | 1/424  | 69/15848  | 0.846685 | 0.913948 | 0.899695 | Soc_11G00 | 1  |
| bomi vs zangga  | GO:0016887 | ATPase ac    | 1/424  | 71/15848  | 0.854814 | 0.913948 | 0.899695 | Soc_1G000 | 1  |
| bomi vs zangga  | GO:0005179 | hormone a    | 1/424  | 72/15848  | 0.858716 | 0.913948 | 0.899695 | Soc_24G00 | 1  |
| bomi vs zangga  | GO:0003824 | catalytic ac | 3/424  | 178/15848 | 0.858942 | 0.913948 | 0.899695 | Soc_24G00 | 3  |
| bomi vs zangga  | GO:0005198 | structural   | 3/424  | 181/15848 | 0.866471 | 0.91744  | 0.903133 | Soc_18G00 | 3  |
| bomi vs zangga  | GO:0005249 | voltage-ga   | 1/424  | 79/15848  | 0.883251 | 0.92856  | 0.914079 | Soc_11G00 | 1  |
| bomi vs zangga  | GO:0007275 | multicellul  | 1/424  | 80/15848  | 0.88639  | 0.92856  | 0.914079 | Soc_8G000 | 1  |
| bomi vs zangga  | GO:0007264 | small GTPa   | 2/424  | 139/15848 | 0.88987  | 0.92856  | 0.914079 | Soc_18G00 | 2  |
| bomi vs zangga  | GO:0005840 | ribosome     | 1/424  | 87/15848  | 0.906129 | 0.94098  | 0.926305 | Soc_24G00 | 1  |
| bomi vs zangga  | GO:0007165 | signal tran  | 6/424  | 351/15848 | 0.911502 | 0.941618 | 0.926933 | Soc_11G00 | 6  |
| bomi vs zangga  | GO:0006412 | translation  | 1/424  | 91/15848  | 0.91583  | 0.941618 | 0.926933 | Soc_24G00 | 1  |
| bomi vs zangga  | GO:0005856 | cytoskelet   | 1/424  | 93/15848  | 0.920299 | 0.941618 | 0.926933 | Soc_11G00 | 1  |
| bomi vs zangga  | GO:0003735 | structural   | 1/424  | 97/15848  | 0.92854  | 0.941618 | 0.926933 | Soc_24G00 | 1  |
| bomi vs zangga  | GO:0006357 | regulation   | 1/424  | 97/15848  | 0.92854  | 0.941618 | 0.926933 | Soc_21G00 | 1  |
| bomi vs zangga  | GO:0003779 | actin bindi  | 1/424  | 105/15848 | 0.942557 | 0.951366 | 0.93653  | Soc_23G00 | 1  |
| bomi vs zangga  | GO:0004252 | serine-tyr   | 1/424  | 143/15848 | 0.97967  | 0.98275  | 0.967424 | Soc_2G000 | 1  |
| bomi vs zangga  | GO:0007155 | cell adhesi  | 1/424  | 149/15848 | 0.98275  | 0.98275  | 0.967424 | Soc_4G000 | 1  |
| milin vs linzhi | GO:0005923 | bicellular t | 11/496 | 74/15848  | 1.78E-05 | 0.003909 | 0.003666 | Soc_13G00 | 11 |
| milin vs linzhi | GO:0004415 | hyalurono    | 4/496  | 10/15848  | 0.000171 | 0.018843 | 0.017671 | Soc_8G000 | 4  |
| milin vs linzhi | GO:0004298 | threonine-   | 5/496  | 23/15848  | 0.00062  | 0.027095 | 0.02541  | Soc_2G000 | 5  |
| milin vs linzhi | GO:0005839 | proteasom    | 5/496  | 23/15848  | 0.00062  | 0.027095 | 0.02541  | Soc_2G000 | 5  |
| milin vs linzhi | GO:0051603 | proteolysis  | 5/496  | 23/15848  | 0.00062  | 0.027095 | 0.02541  | Soc_2G000 | 5  |
| milin vs linzhi | GO:0004175 | endopepti    | 4/496  | 14/15848  | 0.000739 | 0.027095 | 0.02541  | Soc_2G000 | 4  |
| milin vs linzhi | GO:0005272 | sodium ch    | 4/496  | 15/15848  | 0.000983 | 0.030891 | 0.02897  | Soc_22G00 | 4  |
| milin vs linzhi | GO:0003684 | damaged      | 4/496  | 18/15848  | 0.002045 | 0.056243 | 0.052745 | Soc_5G000 | 4  |
| milin vs linzhi | GO:0008009 | chemokine    | 5/496  | 31/15848  | 0.00255  | 0.062336 | 0.058458 | Soc_11G00 | 5  |
| milin vs linzhi | GO:0016757 | transferase  | 6/496  | 47/15848  | 0.003297 | 0.072531 | 0.06802  | Soc_11G00 | 6  |
| milin vs linzhi | GO:0008152 | metabolic    | 15/496 | 226/15848 | 0.005116 | 0.10233  | 0.095965 | Soc_11G00 | 15 |

|                 |            |              |        |           |          |          |          |           |    |
|-----------------|------------|--------------|--------|-----------|----------|----------|----------|-----------|----|
| milin vs linzhi | GO:0009966 | regulation   | 4/496  | 26/15848  | 0.008202 | 0.150363 | 0.14101  | Soc_11G00 | 4  |
| milin vs linzhi | GO:0005198 | structural   | 12/496 | 181/15848 | 0.011689 | 0.177549 | 0.166505 | Soc_13G00 | 12 |
| milin vs linzhi | GO:0016758 | transferase  | 5/496  | 44/15848  | 0.011699 | 0.177549 | 0.166505 | Soc_21G00 | 5  |
| milin vs linzhi | GO:0008233 | peptidase    | 4/496  | 29/15848  | 0.012106 | 0.177549 | 0.166505 | Soc_10G00 | 4  |
| milin vs linzhi | GO:0005975 | carbohydr    | 8/496  | 107/15848 | 0.019083 | 0.25378  | 0.237994 | Soc_15G00 | 8  |
| milin vs linzhi | GO:0004725 | protein tyr  | 5/496  | 50/15848  | 0.01961  | 0.25378  | 0.237994 | Soc_15G00 | 5  |
| milin vs linzhi | GO:0004713 | protein tyr  | 7/496  | 91/15848  | 0.023927 | 0.292443 | 0.274253 | Soc_11G00 | 7  |
| milin vs linzhi | GO:0006814 | sodium ion   | 5/496  | 54/15848  | 0.026467 | 0.306459 | 0.287397 | Soc_22G00 | 5  |
| milin vs linzhi | GO:0004890 | GABA-A re    | 3/496  | 23/15848  | 0.033903 | 0.371468 | 0.348362 | Soc_10G00 | 3  |
| milin vs linzhi | GO:0016779 | nucleotidy   | 2/496  | 10/15848  | 0.037247 | 0.371468 | 0.348362 | Soc_16G00 | 2  |
| milin vs linzhi | GO:0030971 | receptor ty  | 2/496  | 10/15848  | 0.037247 | 0.371468 | 0.348362 | Soc_15G00 | 2  |
| milin vs linzhi | GO:0003924 | GTPase ac    | 16/496 | 314/15848 | 0.038835 | 0.371468 | 0.348362 | Soc_10G00 | 16 |
| milin vs linzhi | GO:0030414 | peptidase    | 2/496  | 11/15848  | 0.044598 | 0.408811 | 0.383382 | Soc_15G00 | 2  |
| milin vs linzhi | GO:0009607 | response t   | 3/496  | 27/15848  | 0.05112  | 0.449855 | 0.421873 | Soc_12G00 | 3  |
| milin vs linzhi | GO:0006281 | DNA repair   | 6/496  | 88/15848  | 0.057666 | 0.479515 | 0.449689 | Soc_13G00 | 6  |
| milin vs linzhi | GO:0032947 | molecular    | 2/496  | 13/15848  | 0.060711 | 0.479515 | 0.449689 | Soc_13G00 | 2  |
| milin vs linzhi | GO:0006397 | mRNA pro     | 3/496  | 29/15848  | 0.061032 | 0.479515 | 0.449689 | Soc_3G00  | 3  |
| milin vs linzhi | GO:0016459 | myosin co    | 5/496  | 70/15848  | 0.067981 | 0.479515 | 0.449689 | Soc_22G00 | 5  |
| milin vs linzhi | GO:0060271 | cilium asse  | 2/496  | 14/15848  | 0.0694   | 0.479515 | 0.449689 | Soc_4G00  | 2  |
| milin vs linzhi | GO:0003774 | motor acti   | 5/496  | 71/15848  | 0.071346 | 0.479515 | 0.449689 | Soc_22G00 | 5  |
| milin vs linzhi | GO:0071805 | potassium    | 3/496  | 31/15848  | 0.071766 | 0.479515 | 0.449689 | Soc_14G00 | 3  |
| milin vs linzhi | GO:0008168 | methyltran   | 4/496  | 51/15848  | 0.074885 | 0.479515 | 0.449689 | Soc_15G00 | 4  |
| milin vs linzhi | GO:0005267 | potassium    | 3/496  | 32/15848  | 0.077428 | 0.479515 | 0.449689 | Soc_14G00 | 3  |
| milin vs linzhi | GO:0008092 | cytoskeleta  | 3/496  | 32/15848  | 0.077428 | 0.479515 | 0.449689 | Soc_14G00 | 3  |
| milin vs linzhi | GO:0005813 | centrosom    | 2/496  | 15/15848  | 0.078466 | 0.479515 | 0.449689 | Soc_4G00  | 2  |
| milin vs linzhi | GO:0006470 | protein de   | 7/496  | 123/15848 | 0.091486 | 0.543974 | 0.510138 | Soc_11G00 | 7  |
| milin vs linzhi | GO:0006955 | immune re    | 7/496  | 127/15848 | 0.103888 | 0.601455 | 0.564044 | Soc_11G00 | 7  |
| milin vs linzhi | GO:0005085 | guanyl-nu    | 4/496  | 58/15848  | 0.10772  | 0.607654 | 0.569857 | Soc_10G00 | 4  |
| milin vs linzhi | GO:0005576 | extracellul  | 14/496 | 311/15848 | 0.111226 | 0.611746 | 0.573695 | Soc_11G00 | 14 |
| milin vs linzhi | GO:0005737 | cytoplasm    | 11/496 | 238/15848 | 0.12832  | 0.645121 | 0.604993 | Soc_15G00 | 11 |
| milin vs linzhi | GO:0042127 | regulation   | 2/496  | 20/15848  | 0.128379 | 0.645121 | 0.604993 | Soc_10G00 | 2  |
| milin vs linzhi | GO:0098609 | cell-cell ac | 2/496  | 20/15848  | 0.128379 | 0.645121 | 0.604993 | Soc_11G00 | 2  |
| milin vs linzhi | GO:0007049 | cell cycle   | 3/496  | 40/15848  | 0.129024 | 0.645121 | 0.604993 | Soc_13G00 | 3  |
| milin vs linzhi | GO:0030170 | pyridoxal    | 3/496  | 41/15848  | 0.136166 | 0.6652   | 0.623824 | Soc_12G00 | 3  |
| milin vs linzhi | GO:0043087 | regulation   | 2/496  | 21/15848  | 0.139087 | 0.6652   | 0.623824 | Soc_3G00  | 2  |
| milin vs linzhi | GO:0005794 | Golgi appa   | 2/496  | 22/15848  | 0.14998  | 0.702033 | 0.658366 | Soc_13G00 | 2  |
| milin vs linzhi | GO:0042613 | MHC class    | 2/496  | 23/15848  | 0.161035 | 0.738075 | 0.692166 | Soc_13G00 | 2  |
| milin vs linzhi | GO:0019882 | antigen pr   | 2/496  | 24/15848  | 0.172231 | 0.764388 | 0.716842 | Soc_13G00 | 2  |

|                 |            |              |       |           |          |          |          |           |   |
|-----------------|------------|--------------|-------|-----------|----------|----------|----------|-----------|---|
| milin vs linzhi | GO:0004867 | serine-tyr   | 3/496 | 46/15848  | 0.173725 | 0.764388 | 0.716842 | Soc_14G00 | 3 |
| milin vs linzhi | GO:0005230 | extracellul  | 4/496 | 71/15848  | 0.182159 | 0.785786 | 0.736909 | Soc_10G00 | 4 |
| milin vs linzhi | GO:0016491 | oxidoredu    | 8/496 | 179/15848 | 0.19942  | 0.788658 | 0.739603 | Soc_10G00 | 8 |
| milin vs linzhi | GO:0009058 | biosynthes   | 3/496 | 50/15848  | 0.2056   | 0.788658 | 0.739603 | Soc_12G00 | 3 |
| milin vs linzhi | GO:0003950 | NAD+ AD      | 2/496 | 28/15848  | 0.218058 | 0.788658 | 0.739603 | Soc_11G00 | 2 |
| milin vs linzhi | GO:0008285 | negative re  | 2/496 | 28/15848  | 0.218058 | 0.788658 | 0.739603 | Soc_11G00 | 2 |
| milin vs linzhi | GO:0043547 | positive re  | 2/496 | 28/15848  | 0.218058 | 0.788658 | 0.739603 | Soc_10G00 | 2 |
| milin vs linzhi | GO:0005234 | extracellul  | 2/496 | 29/15848  | 0.229689 | 0.788658 | 0.739603 | Soc_10G00 | 2 |
| milin vs linzhi | GO:0007601 | visual perc  | 3/496 | 54/15848  | 0.238663 | 0.788658 | 0.739603 | Soc_1G002 | 3 |
| milin vs linzhi | GO:0005578 | extracellul  | 2/496 | 30/15848  | 0.24136  | 0.788658 | 0.739603 | Soc_17G00 | 2 |
| milin vs linzhi | GO:0016746 | transferase  | 2/496 | 31/15848  | 0.253056 | 0.788658 | 0.739603 | Soc_11G00 | 2 |
| milin vs linzhi | GO:0034220 | ion transm   | 4/496 | 82/15848  | 0.254913 | 0.788658 | 0.739603 | Soc_10G00 | 4 |
| milin vs linzhi | GO:0016301 | kinase acti  | 3/496 | 56/15848  | 0.255521 | 0.788658 | 0.739603 | Soc_6G000 | 3 |
| milin vs linzhi | GO:0004888 | transmem     | 7/496 | 165/15848 | 0.259452 | 0.788658 | 0.739603 | Soc_10G00 | 7 |
| milin vs linzhi | GO:0042157 | lipoprotein  | 2/496 | 32/15848  | 0.264765 | 0.788658 | 0.739603 | Soc_1G000 | 2 |
| milin vs linzhi | GO:0003956 | NAD(P)+ -    | 1/496 | 10/15848  | 0.272446 | 0.788658 | 0.739603 | Soc_20G00 | 1 |
| milin vs linzhi | GO:0004957 | prostaglan   | 1/496 | 10/15848  | 0.272446 | 0.788658 | 0.739603 | Soc_14G00 | 1 |
| milin vs linzhi | GO:0045087 | innate imm   | 1/496 | 10/15848  | 0.272446 | 0.788658 | 0.739603 | Soc_4G001 | 1 |
| milin vs linzhi | GO:0004970 | ionotropic   | 2/496 | 33/15848  | 0.276474 | 0.788658 | 0.739603 | Soc_10G00 | 2 |
| milin vs linzhi | GO:0004252 | serine-tyr   | 6/496 | 143/15848 | 0.291009 | 0.788658 | 0.739603 | Soc_1G000 | 6 |
| milin vs linzhi | GO:0005212 | structural   | 1/496 | 11/15848  | 0.295231 | 0.788658 | 0.739603 | Soc_21G00 | 1 |
| milin vs linzhi | GO:0006471 | protein AD   | 1/496 | 11/15848  | 0.295231 | 0.788658 | 0.739603 | Soc_20G00 | 1 |
| milin vs linzhi | GO:0007169 | transmem     | 1/496 | 11/15848  | 0.295231 | 0.788658 | 0.739603 | Soc_3G000 | 1 |
| milin vs linzhi | GO:0007224 | smoother     | 1/496 | 11/15848  | 0.295231 | 0.788658 | 0.739603 | Soc_14G00 | 1 |
| milin vs linzhi | GO:0022857 | transmem     | 4/496 | 88/15848  | 0.296815 | 0.788658 | 0.739603 | Soc_18G00 | 4 |
| milin vs linzhi | GO:0008373 | sialyltransf | 2/496 | 36/15848  | 0.31149  | 0.788658 | 0.739603 | Soc_10G00 | 2 |
| milin vs linzhi | GO:0015031 | protein tra  | 2/496 | 36/15848  | 0.31149  | 0.788658 | 0.739603 | Soc_18G00 | 2 |
| milin vs linzhi | GO:0004707 | MAP kinas    | 1/496 | 12/15848  | 0.317304 | 0.788658 | 0.739603 | Soc_18G00 | 1 |
| milin vs linzhi | GO:0004714 | transmem     | 1/496 | 12/15848  | 0.317304 | 0.788658 | 0.739603 | Soc_3G000 | 1 |
| milin vs linzhi | GO:0006270 | DNA replic   | 1/496 | 12/15848  | 0.317304 | 0.788658 | 0.739603 | Soc_13G00 | 1 |
| milin vs linzhi | GO:0008283 | cell popula  | 1/496 | 12/15848  | 0.317304 | 0.788658 | 0.739603 | Soc_20G00 | 1 |
| milin vs linzhi | GO:0019752 | carboxylic   | 1/496 | 12/15848  | 0.317304 | 0.788658 | 0.739603 | Soc_22G00 | 1 |
| milin vs linzhi | GO:0031175 | neuron pro   | 1/496 | 12/15848  | 0.317304 | 0.788658 | 0.739603 | Soc_15G00 | 1 |
| milin vs linzhi | GO:0043066 | negative re  | 1/496 | 12/15848  | 0.317304 | 0.788658 | 0.739603 | Soc_6G000 | 1 |
| milin vs linzhi | GO:0005856 | cytoskeletal | 4/496 | 93/15848  | 0.332338 | 0.788658 | 0.739603 | Soc_11G00 | 4 |
| milin vs linzhi | GO:0001518 | voltage-ga   | 1/496 | 13/15848  | 0.338686 | 0.788658 | 0.739603 | Soc_6G000 | 1 |
| milin vs linzhi | GO:0003730 | mRNA 3'-     | 1/496 | 13/15848  | 0.338686 | 0.788658 | 0.739603 | Soc_11G00 | 1 |
| milin vs linzhi | GO:0004983 | neuropept    | 1/496 | 13/15848  | 0.338686 | 0.788658 | 0.739603 | Soc_13G00 | 1 |

|                 |            |              |       |           |          |          |          |           |   |
|-----------------|------------|--------------|-------|-----------|----------|----------|----------|-----------|---|
| milin vs linzhi | GO:0008253 | 5'-nucleot   | 1/496 | 13/15848  | 0.338686 | 0.788658 | 0.739603 | Soc_6G00  | 1 |
| milin vs linzhi | GO:0008146 | sulfotransf  | 3/496 | 66/15848  | 0.341361 | 0.788658 | 0.739603 | Soc_13G00 | 3 |
| milin vs linzhi | GO:0005635 | nuclear en   | 1/496 | 14/15848  | 0.359401 | 0.788658 | 0.739603 | Soc_15G00 | 1 |
| milin vs linzhi | GO:0006606 | protein im   | 1/496 | 14/15848  | 0.359401 | 0.788658 | 0.739603 | Soc_6G00  | 1 |
| milin vs linzhi | GO:0045028 | G protein-   | 1/496 | 14/15848  | 0.359401 | 0.788658 | 0.739603 | Soc_16G00 | 1 |
| milin vs linzhi | GO:0048015 | phosphati    | 1/496 | 14/15848  | 0.359401 | 0.788658 | 0.739603 | Soc_9G00  | 1 |
| milin vs linzhi | GO:0016311 | dephosph     | 4/496 | 98/15848  | 0.368053 | 0.788658 | 0.739603 | Soc_11G00 | 4 |
| milin vs linzhi | GO:0001614 | purinergic   | 1/496 | 15/15848  | 0.379468 | 0.788658 | 0.739603 | Soc_10G00 | 1 |
| milin vs linzhi | GO:0003729 | mRNA bin     | 1/496 | 15/15848  | 0.379468 | 0.788658 | 0.739603 | Soc_10G00 | 1 |
| milin vs linzhi | GO:0003810 | protein-gl   | 1/496 | 15/15848  | 0.379468 | 0.788658 | 0.739603 | Soc_15G00 | 1 |
| milin vs linzhi | GO:0004931 | extracellul  | 1/496 | 15/15848  | 0.379468 | 0.788658 | 0.739603 | Soc_10G00 | 1 |
| milin vs linzhi | GO:0004993 | G protein-   | 1/496 | 15/15848  | 0.379468 | 0.788658 | 0.739603 | Soc_20G00 | 1 |
| milin vs linzhi | GO:0005834 | heterotrim   | 1/496 | 15/15848  | 0.379468 | 0.788658 | 0.739603 | Soc_11G00 | 1 |
| milin vs linzhi | GO:0033179 | proton-tra   | 1/496 | 15/15848  | 0.379468 | 0.788658 | 0.739603 | Soc_2G00  | 1 |
| milin vs linzhi | GO:0033198 | response t   | 1/496 | 15/15848  | 0.379468 | 0.788658 | 0.739603 | Soc_10G00 | 1 |
| milin vs linzhi | GO:0046873 | metal ion    | 1/496 | 15/15848  | 0.379468 | 0.788658 | 0.739603 | Soc_19G00 | 1 |
| milin vs linzhi | GO:0051082 | unfolded p   | 2/496 | 42/15848  | 0.380191 | 0.788658 | 0.739603 | Soc_15G00 | 2 |
| milin vs linzhi | GO:0007218 | neuropept    | 1/496 | 16/15848  | 0.398907 | 0.788658 | 0.739603 | Soc_9G00  | 1 |
| milin vs linzhi | GO:0007596 | blood coa    | 1/496 | 16/15848  | 0.398907 | 0.788658 | 0.739603 | Soc_20G00 | 1 |
| milin vs linzhi | GO:0042803 | protein ho   | 1/496 | 16/15848  | 0.398907 | 0.788658 | 0.739603 | Soc_24G00 | 1 |
| milin vs linzhi | GO:0042626 | ATPase-cc    | 2/496 | 46/15848  | 0.424372 | 0.788658 | 0.739603 | Soc_19G00 | 2 |
| milin vs linzhi | GO:0016791 | phosphata    | 4/496 | 106/15848 | 0.424848 | 0.788658 | 0.739603 | Soc_11G00 | 4 |
| milin vs linzhi | GO:0006869 | lipid trans  | 2/496 | 47/15848  | 0.435164 | 0.788658 | 0.739603 | Soc_1G00  | 2 |
| milin vs linzhi | GO:0008021 | synaptic ve  | 1/496 | 18/15848  | 0.435981 | 0.788658 | 0.739603 | Soc_13G00 | 1 |
| milin vs linzhi | GO:0018149 | peptide cr   | 1/496 | 18/15848  | 0.435981 | 0.788658 | 0.739603 | Soc_15G00 | 1 |
| milin vs linzhi | GO:0042310 | vasoconst    | 1/496 | 18/15848  | 0.435981 | 0.788658 | 0.739603 | Soc_20G00 | 1 |
| milin vs linzhi | GO:0046854 | phosphati    | 1/496 | 18/15848  | 0.435981 | 0.788658 | 0.739603 | Soc_9G00  | 1 |
| milin vs linzhi | GO:0007264 | small GTP    | 5/496 | 139/15848 | 0.440612 | 0.788658 | 0.739603 | Soc_10G00 | 5 |
| milin vs linzhi | GO:0031012 | extracellul  | 2/496 | 48/15848  | 0.445845 | 0.788658 | 0.739603 | Soc_1G00  | 2 |
| milin vs linzhi | GO:0005887 | integral co  | 5/496 | 141/15848 | 0.452876 | 0.788658 | 0.739603 | Soc_10G00 | 5 |
| milin vs linzhi | GO:0004181 | metallocar   | 1/496 | 19/15848  | 0.453654 | 0.788658 | 0.739603 | Soc_4G00  | 1 |
| milin vs linzhi | GO:0004386 | helicase ac  | 1/496 | 19/15848  | 0.453654 | 0.788658 | 0.739603 | Soc_13G00 | 1 |
| milin vs linzhi | GO:0051287 | NAD bindi    | 1/496 | 19/15848  | 0.453654 | 0.788658 | 0.739603 | Soc_3G00  | 1 |
| milin vs linzhi | GO:0098655 | cation tran  | 1/496 | 19/15848  | 0.453654 | 0.788658 | 0.739603 | Soc_10G00 | 1 |
| milin vs linzhi | GO:0007154 | cell comm    | 2/496 | 49/15848  | 0.456413 | 0.788658 | 0.739603 | Soc_16G00 | 2 |
| milin vs linzhi | GO:0000398 | mRNA spli    | 1/496 | 20/15848  | 0.470773 | 0.788658 | 0.739603 | Soc_6G00  | 1 |
| milin vs linzhi | GO:0004114 | 3',5'-cyclic | 1/496 | 20/15848  | 0.470773 | 0.788658 | 0.739603 | Soc_1G00  | 1 |
| milin vs linzhi | GO:0005104 | fibroblast   | 1/496 | 20/15848  | 0.470773 | 0.788658 | 0.739603 | Soc_11G00 | 1 |

|                 |            |                                                       |        |           |          |          |          |           |    |
|-----------------|------------|-------------------------------------------------------|--------|-----------|----------|----------|----------|-----------|----|
| milin vs linzhi | GO:0005507 | copper ion                                            | 1/496  | 20/15848  | 0.470773 | 0.788658 | 0.739603 | Soc_22G00 | 1  |
| milin vs linzhi | GO:0006954 | inflammation                                          | 1/496  | 20/15848  | 0.470773 | 0.788658 | 0.739603 | Soc_4G00  | 1  |
| milin vs linzhi | GO:0005506 | iron ion binding                                      | 4/496  | 114/15848 | 0.480292 | 0.788658 | 0.739603 | Soc_12G00 | 4  |
| milin vs linzhi | GO:0005615 | extracellular matrix                                  | 3/496  | 83/15848  | 0.483753 | 0.788658 | 0.739603 | Soc_14G00 | 3  |
| milin vs linzhi | GO:0003824 | catalytic activity                                    | 6/496  | 178/15848 | 0.485268 | 0.788658 | 0.739603 | Soc_11G00 | 6  |
| milin vs linzhi | GO:0006914 | autophagy                                             | 1/496  | 21/15848  | 0.487358 | 0.788658 | 0.739603 | Soc_8G00  | 1  |
| milin vs linzhi | GO:0007605 | sensory perception                                    | 1/496  | 21/15848  | 0.487358 | 0.788658 | 0.739603 | Soc_3G00  | 1  |
| milin vs linzhi | GO:0008236 | serine-type proteinase                                | 1/496  | 21/15848  | 0.487358 | 0.788658 | 0.739603 | Soc_13G00 | 1  |
| milin vs linzhi | GO:0045893 | positive regulation                                   | 1/496  | 21/15848  | 0.487358 | 0.788658 | 0.739603 | Soc_23G00 | 1  |
| milin vs linzhi | GO:0004866 | endopeptidase activity                                | 1/496  | 22/15848  | 0.503423 | 0.788658 | 0.739603 | Soc_16G00 | 1  |
| milin vs linzhi | GO:0005520 | insulin-like growth factor receptor signaling pathway | 1/496  | 22/15848  | 0.503423 | 0.788658 | 0.739603 | Soc_4G00  | 1  |
| milin vs linzhi | GO:0006418 | tRNA aminoacylation                                   | 1/496  | 22/15848  | 0.503423 | 0.788658 | 0.739603 | Soc_7G00  | 1  |
| milin vs linzhi | GO:0045892 | negative regulation                                   | 1/496  | 22/15848  | 0.503423 | 0.788658 | 0.739603 | Soc_13G00 | 1  |
| milin vs linzhi | GO:0045454 | cell redox homeostasis                                | 2/496  | 54/15848  | 0.507438 | 0.788658 | 0.739603 | Soc_11G00 | 2  |
| milin vs linzhi | GO:0007166 | cell surface receptor signaling pathway               | 3/496  | 86/15848  | 0.507457 | 0.788658 | 0.739603 | Soc_13G00 | 3  |
| milin vs linzhi | GO:0006486 | protein glycosylation                                 | 3/496  | 87/15848  | 0.515231 | 0.788658 | 0.739603 | Soc_10G00 | 3  |
| milin vs linzhi | GO:0001558 | regulation of gene expression                         | 1/496  | 23/15848  | 0.518986 | 0.788658 | 0.739603 | Soc_4G00  | 1  |
| milin vs linzhi | GO:0008543 | fibroblast cell proliferation                         | 1/496  | 23/15848  | 0.518986 | 0.788658 | 0.739603 | Soc_11G00 | 1  |
| milin vs linzhi | GO:0030001 | metal ion binding                                     | 1/496  | 23/15848  | 0.518986 | 0.788658 | 0.739603 | Soc_19G00 | 1  |
| milin vs linzhi | GO:0005096 | GTPase activity                                       | 3/496  | 88/15848  | 0.52294  | 0.788658 | 0.739603 | Soc_10G00 | 3  |
| milin vs linzhi | GO:0055114 | oxidation-reduction                                   | 13/496 | 413/15848 | 0.531674 | 0.788658 | 0.739603 | Soc_10G00 | 13 |
| milin vs linzhi | GO:0005262 | calcium channel activity                              | 1/496  | 24/15848  | 0.534063 | 0.788658 | 0.739603 | Soc_9G00  | 1  |
| milin vs linzhi | GO:0008378 | galactosyltransferase activity                        | 1/496  | 24/15848  | 0.534063 | 0.788658 | 0.739603 | Soc_18G00 | 1  |
| milin vs linzhi | GO:0007165 | signal transduction                                   | 11/496 | 351/15848 | 0.541539 | 0.788658 | 0.739603 | Soc_10G00 | 11 |
| milin vs linzhi | GO:0004722 | protein serine/threonine kinase activity              | 1/496  | 25/15848  | 0.548668 | 0.788658 | 0.739603 | Soc_11G00 | 1  |
| milin vs linzhi | GO:0008081 | phosphorylation                                       | 1/496  | 25/15848  | 0.548668 | 0.788658 | 0.739603 | Soc_18G00 | 1  |
| milin vs linzhi | GO:0008565 | obsolete protein                                      | 1/496  | 25/15848  | 0.548668 | 0.788658 | 0.739603 | Soc_6G00  | 1  |
| milin vs linzhi | GO:0022848 | acetylcholinesterase activity                         | 1/496  | 25/15848  | 0.548668 | 0.788658 | 0.739603 | Soc_4G00  | 1  |
| milin vs linzhi | GO:0005216 | ion channel activity                                  | 8/496  | 258/15848 | 0.56099  | 0.788658 | 0.739603 | Soc_10G00 | 8  |
| milin vs linzhi | GO:0004197 | cysteine-type endopeptidase activity                  | 1/496  | 26/15848  | 0.562815 | 0.788658 | 0.739603 | Soc_8G00  | 1  |
| milin vs linzhi | GO:0007160 | cell-matrix adhesion                                  | 1/496  | 26/15848  | 0.562815 | 0.788658 | 0.739603 | Soc_24G00 | 1  |
| milin vs linzhi | GO:0007268 | chemical synapse                                      | 1/496  | 26/15848  | 0.562815 | 0.788658 | 0.739603 | Soc_5G00  | 1  |
| milin vs linzhi | GO:0005328 | neurotransmission                                     | 1/496  | 27/15848  | 0.576521 | 0.792716 | 0.743408 | Soc_9G00  | 1  |
| milin vs linzhi | GO:0015078 | proton transport                                      | 1/496  | 27/15848  | 0.576521 | 0.792716 | 0.743408 | Soc_2G00  | 1  |
| milin vs linzhi | GO:0015991 | proton transport                                      | 1/496  | 27/15848  | 0.576521 | 0.792716 | 0.743408 | Soc_2G00  | 1  |
| milin vs linzhi | GO:0004812 | aminoacyl-tRNA synthetase activity                    | 1/496  | 29/15848  | 0.602658 | 0.818424 | 0.767518 | Soc_7G00  | 1  |
| milin vs linzhi | GO:0006096 | glycolytic process                                    | 1/496  | 29/15848  | 0.602658 | 0.818424 | 0.767518 | Soc_1G00  | 1  |
| milin vs linzhi | GO:0005044 | scavenger receptor activity                           | 2/496  | 66/15848  | 0.616473 | 0.821314 | 0.770227 | Soc_24G00 | 2  |

|                 |            |             |        |           |          |          |          |           |    |
|-----------------|------------|-------------|--------|-----------|----------|----------|----------|-----------|----|
| milin vs linzhi | GO:0000786 | nucleosom   | 4/496  | 137/15848 | 0.625335 | 0.821314 | 0.770227 | Soc_21G00 | 4  |
| milin vs linzhi | GO:0005922 | connexin c  | 1/496  | 31/15848  | 0.627185 | 0.821314 | 0.770227 | Soc_4G000 | 1  |
| milin vs linzhi | GO:0006897 | endocytos   | 1/496  | 31/15848  | 0.627185 | 0.821314 | 0.770227 | Soc_5G000 | 1  |
| milin vs linzhi | GO:0016702 | oxidoredu   | 1/496  | 31/15848  | 0.627185 | 0.821314 | 0.770227 | Soc_24G00 | 1  |
| milin vs linzhi | GO:0045211 | postsynap   | 1/496  | 31/15848  | 0.627185 | 0.821314 | 0.770227 | Soc_4G000 | 1  |
| milin vs linzhi | GO:0006457 | protein fol | 1/496  | 32/15848  | 0.638876 | 0.831673 | 0.779942 | Soc_24G00 | 1  |
| milin vs linzhi | GO:0004842 | ubiquitin-  | 3/496  | 105/15848 | 0.642783 | 0.831716 | 0.779983 | Soc_12G00 | 3  |
| milin vs linzhi | GO:0046872 | metal ion   | 6/496  | 210/15848 | 0.646471 | 0.831716 | 0.779983 | Soc_13G00 | 6  |
| milin vs linzhi | GO:0016887 | ATPase ac   | 2/496  | 71/15848  | 0.656115 | 0.836486 | 0.784456 | Soc_19G00 | 2  |
| milin vs linzhi | GO:0006887 | exocytosis  | 1/496  | 34/15848  | 0.661172 | 0.836486 | 0.784456 | Soc_10G00 | 1  |
| milin vs linzhi | GO:0008083 | growth fac  | 3/496  | 108/15848 | 0.661585 | 0.836486 | 0.784456 | Soc_11G00 | 3  |
| milin vs linzhi | GO:0006811 | ion transp  | 8/496  | 285/15848 | 0.672335 | 0.845221 | 0.792648 | Soc_10G00 | 8  |
| milin vs linzhi | GO:0006836 | neurotrans  | 1/496  | 36/15848  | 0.682094 | 0.852617 | 0.799583 | Soc_9G000 | 1  |
| milin vs linzhi | GO:0007399 | nervous sy  | 1/496  | 37/15848  | 0.692066 | 0.860195 | 0.80669  | Soc_7G000 | 1  |
| milin vs linzhi | GO:0008080 | N-acetyltr  | 1/496  | 38/15848  | 0.701726 | 0.867302 | 0.813355 | Soc_15G00 | 1  |
| milin vs linzhi | GO:0005783 | endoplasm   | 1/496  | 39/15848  | 0.711084 | 0.873957 | 0.819596 | Soc_9G000 | 1  |
| milin vs linzhi | GO:0007275 | multicellul | 2/496  | 80/15848  | 0.719134 | 0.878941 | 0.82427  | Soc_11G00 | 2  |
| milin vs linzhi | GO:0016192 | vesicle-me  | 2/496  | 82/15848  | 0.731745 | 0.889413 | 0.834091 | Soc_10G00 | 2  |
| milin vs linzhi | GO:0000166 | nucleotide  | 1/496  | 43/15848  | 0.745674 | 0.896439 | 0.84068  | Soc_7G000 | 1  |
| milin vs linzhi | GO:0006816 | calcium io  | 1/496  | 43/15848  | 0.745674 | 0.896439 | 0.84068  | Soc_9G000 | 1  |
| milin vs linzhi | GO:0046983 | protein dir | 6/496  | 236/15848 | 0.752204 | 0.899374 | 0.843432 | Soc_16G00 | 6  |
| milin vs linzhi | GO:0030036 | actin cytos | 1/496  | 45/15848  | 0.761387 | 0.905433 | 0.849114 | Soc_14G00 | 1  |
| milin vs linzhi | GO:0008289 | lipid bindi | 2/496  | 88/15848  | 0.766721 | 0.906874 | 0.850465 | Soc_1G000 | 2  |
| milin vs linzhi | GO:0007156 | homophilic  | 3/496  | 131/15848 | 0.782018 | 0.920021 | 0.862795 | Soc_10G00 | 3  |
| milin vs linzhi | GO:0016787 | hydrolase   | 3/496  | 134/15848 | 0.794781 | 0.928501 | 0.870748 | Soc_11G00 | 3  |
| milin vs linzhi | GO:0015074 | DNA integ   | 2/496  | 94/15848  | 0.797667 | 0.928501 | 0.870748 | Soc_12G00 | 2  |
| milin vs linzhi | GO:0036459 | thiol-depe  | 1/496  | 52/15848  | 0.809134 | 0.932525 | 0.874521 | Soc_11G00 | 1  |
| milin vs linzhi | GO:0004984 | olfactory r | 1/496  | 53/15848  | 0.815127 | 0.932525 | 0.874521 | Soc_16G00 | 1  |
| milin vs linzhi | GO:0035091 | phosphatic  | 1/496  | 53/15848  | 0.815127 | 0.932525 | 0.874521 | Soc_9G000 | 1  |
| milin vs linzhi | GO:0000287 | magnesium   | 1/496  | 54/15848  | 0.820932 | 0.932525 | 0.874521 | Soc_6G000 | 1  |
| milin vs linzhi | GO:0004872 | signaling r | 1/496  | 55/15848  | 0.826556 | 0.932525 | 0.874521 | Soc_10G00 | 1  |
| milin vs linzhi | GO:0070588 | calcium io  | 1/496  | 55/15848  | 0.826556 | 0.932525 | 0.874521 | Soc_9G000 | 1  |
| milin vs linzhi | GO:0005739 | mitochond   | 1/496  | 57/15848  | 0.83728  | 0.939804 | 0.881347 | Soc_5G000 | 1  |
| milin vs linzhi | GO:0008138 | protein tyr | 1/496  | 58/15848  | 0.842391 | 0.940741 | 0.882226 | Soc_11G00 | 1  |
| milin vs linzhi | GO:0007155 | cell adhesi | 3/496  | 149/15848 | 0.849563 | 0.942708 | 0.884071 | Soc_15G00 | 3  |
| milin vs linzhi | GO:0006508 | proteolysis | 10/496 | 422/15848 | 0.855054 | 0.942708 | 0.884071 | Soc_10G00 | 10 |
| milin vs linzhi | GO:0004222 | metalloent  | 2/496  | 109/15848 | 0.85965  | 0.942708 | 0.884071 | Soc_10G00 | 2  |
| milin vs linzhi | GO:0004674 | protein set | 2/496  | 110/15848 | 0.863093 | 0.942708 | 0.884071 | Soc_10G00 | 2  |

|                 |            |              |       |           |          |          |          |           |   |
|-----------------|------------|--------------|-------|-----------|----------|----------|----------|-----------|---|
| milin vs linzhi | GO:0016579 | protein de   | 1/496 | 63/15848  | 0.865641 | 0.942708 | 0.884071 | Soc_11G00 | 1 |
| milin vs linzhi | GO:0016567 | protein ub   | 1/496 | 64/15848  | 0.869863 | 0.942708 | 0.884071 | Soc_12G00 | 1 |
| milin vs linzhi | GO:0006886 | intracellula | 2/496 | 115/15848 | 0.879176 | 0.945306 | 0.886507 | Soc_18G00 | 2 |
| milin vs linzhi | GO:0003723 | RNA bindi    | 4/496 | 202/15848 | 0.880853 | 0.945306 | 0.886507 | Soc_10G00 | 4 |
| milin vs linzhi | GO:0005179 | hormone a    | 1/496 | 72/15848  | 0.899203 | 0.960314 | 0.900582 | Soc_11G00 | 1 |
| milin vs linzhi | GO:0016705 | oxidoredu    | 1/496 | 74/15848  | 0.905442 | 0.962306 | 0.902449 | Soc_12G00 | 1 |
| milin vs linzhi | GO:0006629 | lipid meta   | 1/496 | 76/15848  | 0.911295 | 0.963185 | 0.903274 | Soc_18G00 | 1 |
| milin vs linzhi | GO:0004871 | obsolete s   | 1/496 | 78/15848  | 0.916787 | 0.963185 | 0.903274 | Soc_11G00 | 1 |
| milin vs linzhi | GO:0005249 | voltage-g    | 1/496 | 79/15848  | 0.919404 | 0.963185 | 0.903274 | Soc_14G00 | 1 |
| milin vs linzhi | GO:0005089 | Rho guany    | 1/496 | 84/15848  | 0.931308 | 0.965897 | 0.905818 | Soc_9G00  | 1 |
| milin vs linzhi | GO:0005622 | intracellula | 8/496 | 400/15848 | 0.936254 | 0.965897 | 0.905818 | Soc_11G00 | 8 |
| milin vs linzhi | GO:0005882 | intermedia   | 1/496 | 87/15848  | 0.937591 | 0.965897 | 0.905818 | Soc_6G00  | 1 |
| milin vs linzhi | GO:0035023 | regulation   | 1/496 | 88/15848  | 0.939555 | 0.965897 | 0.905818 | Soc_9G00  | 1 |
| milin vs linzhi | GO:0020037 | heme bind    | 1/496 | 91/15848  | 0.945084 | 0.967063 | 0.906911 | Soc_12G00 | 1 |
| milin vs linzhi | GO:0003779 | actin bind   | 1/496 | 105/15848 | 0.964913 | 0.982782 | 0.921652 | Soc_14G00 | 1 |
| milin vs linzhi | GO:0035556 | intracellula | 2/496 | 170/15848 | 0.971421 | 0.98485  | 0.923592 | Soc_5G00  | 2 |
| milin vs linzhi | GO:0006813 | potassium    | 1/496 | 125/15848 | 0.981511 | 0.990516 | 0.928905 | Soc_14G00 | 1 |
| milin vs linzhi | GO:0003700 | DNA-bind     | 7/496 | 476/15848 | 0.993191 | 0.997726 | 0.935667 | Soc_1G00  | 7 |
| milin vs linzhi | GO:0043565 | sequence-    | 1/496 | 191/15848 | 0.997781 | 0.997781 | 0.935718 | Soc_24G00 | 1 |
| milin vs zangga | GO:0006935 | chemotaxi    | 6/441 | 33/15848  | 0.000263 | 0.038444 | 0.037187 | Soc_15G00 | 6 |
| milin vs zangga | GO:0008417 | fucosyltra   | 4/441 | 13/15848  | 0.000346 | 0.038444 | 0.037187 | Soc_13G00 | 4 |
| milin vs zangga | GO:0008009 | chemokine    | 5/441 | 31/15848  | 0.001524 | 0.112805 | 0.109114 | Soc_11G00 | 5 |
| milin vs zangga | GO:0004950 | chemokine    | 4/441 | 23/15848  | 0.003441 | 0.166361 | 0.160918 | Soc_15G00 | 4 |
| milin vs zangga | GO:0006814 | sodium ion   | 6/441 | 54/15848  | 0.003747 | 0.166361 | 0.160918 | Soc_20G00 | 6 |
| milin vs zangga | GO:0022848 | acetylchol   | 4/441 | 25/15848  | 0.004705 | 0.174095 | 0.168399 | Soc_4G00  | 4 |
| milin vs zangga | GO:0016758 | transferase  | 5/441 | 44/15848  | 0.007254 | 0.210595 | 0.203705 | Soc_5G00  | 5 |
| milin vs zangga | GO:0005272 | sodium ch    | 3/441 | 15/15848  | 0.007589 | 0.210595 | 0.203705 | Soc_22G00 | 3 |
| milin vs zangga | GO:0007596 | blood coa    | 3/441 | 16/15848  | 0.00915  | 0.225698 | 0.218314 | Soc_18G00 | 3 |
| milin vs zangga | GO:0045211 | postsynap    | 4/441 | 31/15848  | 0.010268 | 0.227949 | 0.220491 | Soc_4G00  | 4 |
| milin vs zangga | GO:0004713 | protein tyr  | 7/441 | 91/15848  | 0.013439 | 0.27123  | 0.262356 | Soc_11G00 | 7 |
| milin vs zangga | GO:0005242 | inward rec   | 3/441 | 21/15848  | 0.019614 | 0.334942 | 0.323984 | Soc_11G00 | 3 |
| milin vs zangga | GO:0007605 | sensory pe   | 3/441 | 21/15848  | 0.019614 | 0.334942 | 0.323984 | Soc_3G00  | 3 |
| milin vs zangga | GO:0030971 | receptor ty  | 2/441 | 10/15848  | 0.029988 | 0.475521 | 0.459963 | Soc_15G00 | 2 |
| milin vs zangga | GO:0005230 | extracellul  | 5/441 | 71/15848  | 0.047582 | 0.615826 | 0.595678 | Soc_13G00 | 5 |
| milin vs zangga | GO:0004983 | neuropept    | 2/441 | 13/15848  | 0.04921  | 0.615826 | 0.595678 | Soc_13G00 | 2 |
| milin vs zangga | GO:0000226 | microtubul   | 3/441 | 30/15848  | 0.049884 | 0.615826 | 0.595678 | Soc_15G00 | 3 |
| milin vs zangga | GO:0004725 | protein tyr  | 4/441 | 50/15848  | 0.049932 | 0.615826 | 0.595678 | Soc_15G00 | 4 |
| milin vs zangga | GO:0008168 | methyltra    | 4/441 | 51/15848  | 0.053041 | 0.616629 | 0.596455 | Soc_15G00 | 4 |

|                 |            |              |        |           |          |          |          |           |    |
|-----------------|------------|--------------|--------|-----------|----------|----------|----------|-----------|----|
| milin vs zangga | GO:0005635 | nuclear en   | 2/441  | 14/15848  | 0.056379 | 0.616629 | 0.596455 | Soc_12G00 | 2  |
| milin vs zangga | GO:0006351 | transcripti  | 4/441  | 53/15848  | 0.059567 | 0.616629 | 0.596455 | Soc_15G00 | 4  |
| milin vs zangga | GO:0003810 | protein-gl   | 2/441  | 15/15848  | 0.063885 | 0.616629 | 0.596455 | Soc_15G00 | 2  |
| milin vs zangga | GO:0051225 | spindle ass  | 2/441  | 15/15848  | 0.063885 | 0.616629 | 0.596455 | Soc_4G000 | 2  |
| milin vs zangga | GO:0034220 | ion transm   | 5/441  | 82/15848  | 0.078315 | 0.677804 | 0.655629 | Soc_13G00 | 5  |
| milin vs zangga | GO:0003684 | damaged      | 2/441  | 18/15848  | 0.088191 | 0.677804 | 0.655629 | Soc_7G000 | 2  |
| milin vs zangga | GO:0018149 | peptide cr   | 2/441  | 18/15848  | 0.088191 | 0.677804 | 0.655629 | Soc_15G00 | 2  |
| milin vs zangga | GO:0004888 | transmem     | 8/441  | 165/15848 | 0.090269 | 0.677804 | 0.655629 | Soc_13G00 | 8  |
| milin vs zangga | GO:0005576 | extracellul  | 13/441 | 311/15848 | 0.095364 | 0.677804 | 0.655629 | Soc_11G00 | 13 |
| milin vs zangga | GO:0005086 | ARF guany    | 2/441  | 19/15848  | 0.096815 | 0.677804 | 0.655629 | Soc_17G00 | 2  |
| milin vs zangga | GO:0032012 | regulation   | 2/441  | 19/15848  | 0.096815 | 0.677804 | 0.655629 | Soc_17G00 | 2  |
| milin vs zangga | GO:0006281 | DNA repair   | 5/441  | 88/15848  | 0.098666 | 0.677804 | 0.655629 | Soc_17G00 | 5  |
| milin vs zangga | GO:0008152 | metabolic    | 10/441 | 226/15848 | 0.100687 | 0.677804 | 0.655629 | Soc_11G00 | 10 |
| milin vs zangga | GO:0003924 | GTPase ac    | 13/441 | 314/15848 | 0.100755 | 0.677804 | 0.655629 | Soc_1G000 | 13 |
| milin vs zangga | GO:0007015 | actin filam  | 2/441  | 21/15848  | 0.114724 | 0.727675 | 0.703868 | Soc_20G00 | 2  |
| milin vs zangga | GO:0043087 | regulation   | 2/441  | 21/15848  | 0.114724 | 0.727675 | 0.703868 | Soc_3G000 | 2  |
| milin vs zangga | GO:0045892 | negative r   | 2/441  | 22/15848  | 0.123971 | 0.753226 | 0.728583 | Soc_13G00 | 2  |
| milin vs zangga | GO:0004298 | threonine    | 2/441  | 23/15848  | 0.13339  | 0.753226 | 0.728583 | Soc_17G00 | 2  |
| milin vs zangga | GO:0005839 | proteasom    | 2/441  | 23/15848  | 0.13339  | 0.753226 | 0.728583 | Soc_17G00 | 2  |
| milin vs zangga | GO:0051603 | proteolysis  | 2/441  | 23/15848  | 0.13339  | 0.753226 | 0.728583 | Soc_17G00 | 2  |
| milin vs zangga | GO:0004867 | serine-tyr   | 3/441  | 46/15848  | 0.135716 | 0.753226 | 0.728583 | Soc_14G00 | 3  |
| milin vs zangga | GO:0005923 | bicellular t | 4/441  | 74/15848  | 0.150795 | 0.777059 | 0.751636 | Soc_13G00 | 4  |
| milin vs zangga | GO:0007601 | visual perc  | 3/441  | 54/15848  | 0.189794 | 0.777059 | 0.751636 | Soc_17G00 | 3  |
| milin vs zangga | GO:0005234 | extracellul  | 2/441  | 29/15848  | 0.192627 | 0.777059 | 0.751636 | Soc_10G00 | 2  |
| milin vs zangga | GO:0016301 | kinase acti  | 3/441  | 56/15848  | 0.204084 | 0.777059 | 0.751636 | Soc_17G00 | 3  |
| milin vs zangga | GO:0006486 | protein gly  | 4/441  | 87/15848  | 0.223564 | 0.777059 | 0.751636 | Soc_13G00 | 4  |
| milin vs zangga | GO:0004970 | ionotropic   | 2/441  | 33/15848  | 0.23372  | 0.777059 | 0.751636 | Soc_10G00 | 2  |
| milin vs zangga | GO:0004957 | prostaglan   | 1/441  | 10/15848  | 0.245949 | 0.777059 | 0.751636 | Soc_13G00 | 1  |
| milin vs zangga | GO:0006885 | regulation   | 1/441  | 10/15848  | 0.245949 | 0.777059 | 0.751636 | Soc_3G000 | 1  |
| milin vs zangga | GO:0015385 | sodium:pr    | 1/441  | 10/15848  | 0.245949 | 0.777059 | 0.751636 | Soc_3G000 | 1  |
| milin vs zangga | GO:0006470 | protein de   | 5/441  | 123/15848 | 0.258055 | 0.777059 | 0.751636 | Soc_11G00 | 5  |
| milin vs zangga | GO:0015031 | protein tra  | 2/441  | 36/15848  | 0.264865 | 0.777059 | 0.751636 | Soc_18G00 | 2  |
| milin vs zangga | GO:0005247 | voltage-ga   | 1/441  | 11/15848  | 0.266945 | 0.777059 | 0.751636 | Soc_13G00 | 1  |
| milin vs zangga | GO:0007169 | transmem     | 1/441  | 11/15848  | 0.266945 | 0.777059 | 0.751636 | Soc_3G000 | 1  |
| milin vs zangga | GO:0007224 | smoothen     | 1/441  | 11/15848  | 0.266945 | 0.777059 | 0.751636 | Soc_14G00 | 1  |
| milin vs zangga | GO:0030414 | peptidase    | 1/441  | 11/15848  | 0.266945 | 0.777059 | 0.751636 | Soc_19G00 | 1  |
| milin vs zangga | GO:0044212 | transcripti  | 1/441  | 11/15848  | 0.266945 | 0.777059 | 0.751636 | Soc_11G00 | 1  |
| milin vs zangga | GO:0006813 | potassium    | 5/441  | 125/15848 | 0.26865  | 0.777059 | 0.751636 | Soc_11G00 | 5  |



|                 |            |              |        |           |          |          |          |           |    |
|-----------------|------------|--------------|--------|-----------|----------|----------|----------|-----------|----|
| milin vs zangga | GO:0006811 | ion transp   | 10/441 | 285/15848 | 0.271688 | 0.777059 | 0.751636 | Soc_10G00 | 10 |
| milin vs zangga | GO:0005215 | transporte   | 2/441  | 37/15848  | 0.275258 | 0.777059 | 0.751636 | Soc_20G00 | 2  |
| milin vs zangga | GO:0006955 | immune re    | 5/441  | 127/15848 | 0.279339 | 0.777059 | 0.751636 | Soc_11G00 | 5  |
| milin vs zangga | GO:0008080 | N-acetyltr   | 2/441  | 38/15848  | 0.285643 | 0.777059 | 0.751636 | Soc_15G00 | 2  |
| milin vs zangga | GO:0000139 | Golgi mem    | 1/441  | 12/15848  | 0.287358 | 0.777059 | 0.751636 | Soc_6G000 | 1  |
| milin vs zangga | GO:0004707 | MAP kinas    | 1/441  | 12/15848  | 0.287358 | 0.777059 | 0.751636 | Soc_18G00 | 1  |
| milin vs zangga | GO:0004714 | transmem     | 1/441  | 12/15848  | 0.287358 | 0.777059 | 0.751636 | Soc_3G000 | 1  |
| milin vs zangga | GO:0008283 | cell popul   | 1/441  | 12/15848  | 0.287358 | 0.777059 | 0.751636 | Soc_20G00 | 1  |
| milin vs zangga | GO:0030833 | regulation   | 1/441  | 12/15848  | 0.287358 | 0.777059 | 0.751636 | Soc_7G000 | 1  |
| milin vs zangga | GO:0031175 | neuron pr    | 1/441  | 12/15848  | 0.287358 | 0.777059 | 0.751636 | Soc_15G00 | 1  |
| milin vs zangga | GO:0043066 | negative r   | 1/441  | 12/15848  | 0.287358 | 0.777059 | 0.751636 | Soc_1G000 | 1  |
| milin vs zangga | GO:0051056 | regulation   | 1/441  | 12/15848  | 0.287358 | 0.777059 | 0.751636 | Soc_23G00 | 1  |
| milin vs zangga | GO:0005216 | ion channe   | 9/441  | 258/15848 | 0.292059 | 0.777059 | 0.751636 | Soc_10G00 | 9  |
| milin vs zangga | GO:0007049 | cell cycle   | 2/441  | 40/15848  | 0.306361 | 0.777059 | 0.751636 | Soc_20G00 | 2  |
| milin vs zangga | GO:0005911 | cell-cell ju | 1/441  | 13/15848  | 0.307203 | 0.777059 | 0.751636 | Soc_11G00 | 1  |
| milin vs zangga | GO:0015299 | solute:prof  | 1/441  | 13/15848  | 0.307203 | 0.777059 | 0.751636 | Soc_3G000 | 1  |
| milin vs zangga | GO:0019904 | protein do   | 1/441  | 13/15848  | 0.307203 | 0.777059 | 0.751636 | Soc_6G000 | 1  |
| milin vs zangga | GO:0032947 | molecular    | 1/441  | 13/15848  | 0.307203 | 0.777059 | 0.751636 | Soc_13G00 | 1  |
| milin vs zangga | GO:0016887 | ATPase ac    | 3/441  | 71/15848  | 0.316604 | 0.777059 | 0.751636 | Soc_19G00 | 3  |
| milin vs zangga | GO:0005179 | hormone      | 3/441  | 72/15848  | 0.32426  | 0.777059 | 0.751636 | Soc_13G00 | 3  |
| milin vs zangga | GO:0003714 | transcripti  | 1/441  | 14/15848  | 0.326497 | 0.777059 | 0.751636 | Soc_3G000 | 1  |
| milin vs zangga | GO:0005158 | insulin rec  | 1/441  | 14/15848  | 0.326497 | 0.777059 | 0.751636 | Soc_4G000 | 1  |
| milin vs zangga | GO:0006606 | protein im   | 1/441  | 14/15848  | 0.326497 | 0.777059 | 0.751636 | Soc_6G000 | 1  |
| milin vs zangga | GO:0048015 | phosphati    | 1/441  | 14/15848  | 0.326497 | 0.777059 | 0.751636 | Soc_9G000 | 1  |
| milin vs zangga | GO:0005737 | cytoplasm    | 8/441  | 238/15848 | 0.344013 | 0.777059 | 0.751636 | Soc_13G00 | 8  |
| milin vs zangga | GO:0004993 | G protein-   | 1/441  | 15/15848  | 0.345255 | 0.777059 | 0.751636 | Soc_20G00 | 1  |
| milin vs zangga | GO:0006364 | rRNA proc    | 1/441  | 15/15848  | 0.345255 | 0.777059 | 0.751636 | Soc_5G000 | 1  |
| milin vs zangga | GO:0008033 | tRNA proc    | 1/441  | 15/15848  | 0.345255 | 0.777059 | 0.751636 | Soc_23G00 | 1  |
| milin vs zangga | GO:0030131 | clathrin ac  | 1/441  | 15/15848  | 0.345255 | 0.777059 | 0.751636 | Soc_8G000 | 1  |
| milin vs zangga | GO:0030286 | dynein cor   | 1/441  | 15/15848  | 0.345255 | 0.777059 | 0.751636 | Soc_4G000 | 1  |
| milin vs zangga | GO:0033179 | proton-tra   | 1/441  | 15/15848  | 0.345255 | 0.777059 | 0.751636 | Soc_11G00 | 1  |
| milin vs zangga | GO:0005885 | Arp2/3 pr    | 1/441  | 16/15848  | 0.363492 | 0.777059 | 0.751636 | Soc_7G000 | 1  |
| milin vs zangga | GO:0006310 | DNA recor    | 1/441  | 16/15848  | 0.363492 | 0.777059 | 0.751636 | Soc_4G000 | 1  |
| milin vs zangga | GO:0007218 | neuropept    | 1/441  | 16/15848  | 0.363492 | 0.777059 | 0.751636 | Soc_3G000 | 1  |
| milin vs zangga | GO:0016042 | lipid catab  | 1/441  | 16/15848  | 0.363492 | 0.777059 | 0.751636 | Soc_13G00 | 1  |
| milin vs zangga | GO:0004252 | serine-tyr   | 5/441  | 143/15848 | 0.366992 | 0.777059 | 0.751636 | Soc_13G00 | 5  |
| milin vs zangga | GO:0016757 | transferase  | 2/441  | 47/15848  | 0.377637 | 0.777059 | 0.751636 | Soc_15G00 | 2  |
| milin vs zangga | GO:0034314 | Arp2/3 co    | 1/441  | 17/15848  | 0.381222 | 0.777059 | 0.751636 | Soc_7G000 | 1  |

|                 |            |               |       |           |          |          |          |           |   |
|-----------------|------------|---------------|-------|-----------|----------|----------|----------|-----------|---|
| milin vs zangga | GO:0051536 | iron-sulfur   | 1/441 | 17/15848  | 0.381222 | 0.777059 | 0.751636 | Soc_23G00 | 1 |
| milin vs zangga | GO:0005198 | structural    | 6/441 | 181/15848 | 0.390559 | 0.777059 | 0.751636 | Soc_14G00 | 6 |
| milin vs zangga | GO:0006886 | intracellular | 4/441 | 115/15848 | 0.39826  | 0.777059 | 0.751636 | Soc_6G000 | 4 |
| milin vs zangga | GO:0004702 | obsolete s    | 1/441 | 18/15848  | 0.398459 | 0.777059 | 0.751636 | Soc_22G00 | 1 |
| milin vs zangga | GO:0007178 | transmem      | 1/441 | 18/15848  | 0.398459 | 0.777059 | 0.751636 | Soc_22G00 | 1 |
| milin vs zangga | GO:0008484 | sulfuric est  | 1/441 | 18/15848  | 0.398459 | 0.777059 | 0.751636 | Soc_3G000 | 1 |
| milin vs zangga | GO:0017137 | Rab GTPase    | 1/441 | 18/15848  | 0.398459 | 0.777059 | 0.751636 | Soc_1G002 | 1 |
| milin vs zangga | GO:0042310 | vasoconstr    | 1/441 | 18/15848  | 0.398459 | 0.777059 | 0.751636 | Soc_20G00 | 1 |
| milin vs zangga | GO:0046854 | phosphatic    | 1/441 | 18/15848  | 0.398459 | 0.777059 | 0.751636 | Soc_9G000 | 1 |
| milin vs zangga | GO:0016192 | vesicle-me    | 3/441 | 82/15848  | 0.400356 | 0.777059 | 0.751636 | Soc_12G00 | 3 |
| milin vs zangga | GO:0005201 | extracellul   | 1/441 | 19/15848  | 0.415217 | 0.777059 | 0.751636 | Soc_18G00 | 1 |
| milin vs zangga | GO:0005743 | mitochond     | 1/441 | 19/15848  | 0.415217 | 0.777059 | 0.751636 | Soc_12G00 | 1 |
| milin vs zangga | GO:0006366 | transcripti   | 1/441 | 19/15848  | 0.415217 | 0.777059 | 0.751636 | Soc_4G000 | 1 |
| milin vs zangga | GO:0005102 | signaling r   | 2/441 | 52/15848  | 0.426662 | 0.777059 | 0.751636 | Soc_15G00 | 2 |
| milin vs zangga | GO:0000398 | mRNA spli     | 1/441 | 20/15848  | 0.431509 | 0.777059 | 0.751636 | Soc_6G000 | 1 |
| milin vs zangga | GO:0004114 | 3',5'-cyclic  | 1/441 | 20/15848  | 0.431509 | 0.777059 | 0.751636 | Soc_18G00 | 1 |
| milin vs zangga | GO:0006413 | translation   | 1/441 | 20/15848  | 0.431509 | 0.777059 | 0.751636 | Soc_12G00 | 1 |
| milin vs zangga | GO:0042127 | regulation    | 1/441 | 20/15848  | 0.431509 | 0.777059 | 0.751636 | Soc_10G00 | 1 |
| milin vs zangga | GO:0005096 | GTPase ac     | 3/441 | 88/15848  | 0.444923 | 0.777059 | 0.751636 | Soc_10G00 | 3 |
| milin vs zangga | GO:0008289 | lipid bindi   | 3/441 | 88/15848  | 0.444923 | 0.777059 | 0.751636 | Soc_13G00 | 3 |
| milin vs zangga | GO:0006338 | chromatin     | 1/441 | 21/15848  | 0.447349 | 0.777059 | 0.751636 | Soc_8G000 | 1 |
| milin vs zangga | GO:0006914 | autophagy     | 1/441 | 21/15848  | 0.447349 | 0.777059 | 0.751636 | Soc_8G000 | 1 |
| milin vs zangga | GO:0015629 | actin cytos   | 1/441 | 21/15848  | 0.447349 | 0.777059 | 0.751636 | Soc_7G000 | 1 |
| milin vs zangga | GO:0045893 | positive re   | 1/441 | 21/15848  | 0.447349 | 0.777059 | 0.751636 | Soc_8G000 | 1 |
| milin vs zangga | GO:0004872 | signaling r   | 2/441 | 55/15848  | 0.455094 | 0.777059 | 0.751636 | Soc_10G00 | 2 |
| milin vs zangga | GO:0003899 | DNA-direc     | 1/441 | 22/15848  | 0.462748 | 0.777059 | 0.751636 | Soc_6G000 | 1 |
| milin vs zangga | GO:0005794 | Golgi appa    | 1/441 | 22/15848  | 0.462748 | 0.777059 | 0.751636 | Soc_5G000 | 1 |
| milin vs zangga | GO:0006418 | tRNA amir     | 1/441 | 22/15848  | 0.462748 | 0.777059 | 0.751636 | Soc_6G000 | 1 |
| milin vs zangga | GO:0004890 | GABA-A re     | 1/441 | 23/15848  | 0.477719 | 0.777059 | 0.751636 | Soc_13G00 | 1 |
| milin vs zangga | GO:0005856 | cytoskelet    | 3/441 | 93/15848  | 0.481036 | 0.777059 | 0.751636 | Soc_11G00 | 3 |
| milin vs zangga | GO:0005085 | guanyl-nu     | 2/441 | 58/15848  | 0.4827   | 0.777059 | 0.751636 | Soc_10G00 | 2 |
| milin vs zangga | GO:0046983 | protein dir   | 7/441 | 236/15848 | 0.485916 | 0.777059 | 0.751636 | Soc_17G00 | 7 |
| milin vs zangga | GO:0003723 | RNA bindi     | 6/441 | 202/15848 | 0.49384  | 0.777059 | 0.751636 | Soc_18G00 | 6 |
| milin vs zangga | GO:0006821 | chloride tr   | 1/441 | 25/15848  | 0.506423 | 0.777059 | 0.751636 | Soc_13G00 | 1 |
| milin vs zangga | GO:0007010 | cytoskelet    | 1/441 | 25/15848  | 0.506423 | 0.777059 | 0.751636 | Soc_11G00 | 1 |
| milin vs zangga | GO:0008081 | phosphori     | 1/441 | 25/15848  | 0.506423 | 0.777059 | 0.751636 | Soc_18G00 | 1 |
| milin vs zangga | GO:0008565 | obsolete p    | 1/441 | 25/15848  | 0.506423 | 0.777059 | 0.751636 | Soc_6G000 | 1 |
| milin vs zangga | GO:0003707 | steroid ho    | 2/441 | 61/15848  | 0.509426 | 0.777059 | 0.751636 | Soc_19G00 | 2 |

|                 |            |              |       |           |          |          |          |           |   |
|-----------------|------------|--------------|-------|-----------|----------|----------|----------|-----------|---|
| milin vs zangga | GO:0043401 | steroid ho   | 2/441 | 61/15848  | 0.509426 | 0.777059 | 0.751636 | Soc_19G00 | 2 |
| milin vs zangga | GO:0016311 | dephosph     | 3/441 | 98/15848  | 0.516006 | 0.777059 | 0.751636 | Soc_11G00 | 3 |
| milin vs zangga | GO:0004197 | cysteine-t   | 1/441 | 26/15848  | 0.520179 | 0.777059 | 0.751636 | Soc_8G000 | 1 |
| milin vs zangga | GO:0016579 | protein de   | 2/441 | 63/15848  | 0.526735 | 0.777059 | 0.751636 | Soc_17G00 | 2 |
| milin vs zangga | GO:0046872 | metal ion    | 6/441 | 210/15848 | 0.53176  | 0.777059 | 0.751636 | Soc_11G00 | 6 |
| milin vs zangga | GO:0005200 | structural   | 1/441 | 27/15848  | 0.533553 | 0.777059 | 0.751636 | Soc_1G001 | 1 |
| milin vs zangga | GO:0009607 | response t   | 1/441 | 27/15848  | 0.533553 | 0.777059 | 0.751636 | Soc_13G00 | 1 |
| milin vs zangga | GO:0015078 | proton tra   | 1/441 | 27/15848  | 0.533553 | 0.777059 | 0.751636 | Soc_11G00 | 1 |
| milin vs zangga | GO:0015991 | proton tra   | 1/441 | 27/15848  | 0.533553 | 0.777059 | 0.751636 | Soc_11G00 | 1 |
| milin vs zangga | GO:0003950 | NAD+ AD      | 1/441 | 28/15848  | 0.546555 | 0.777059 | 0.751636 | Soc_2G000 | 1 |
| milin vs zangga | GO:0043547 | positive re  | 1/441 | 28/15848  | 0.546555 | 0.777059 | 0.751636 | Soc_10G00 | 1 |
| milin vs zangga | GO:0005044 | scavenger    | 2/441 | 66/15848  | 0.551913 | 0.777059 | 0.751636 | Soc_24G00 | 2 |
| milin vs zangga | GO:0007018 | microtubu    | 2/441 | 66/15848  | 0.551913 | 0.777059 | 0.751636 | Soc_1G000 | 2 |
| milin vs zangga | GO:0008146 | sulfotransf  | 2/441 | 66/15848  | 0.551913 | 0.777059 | 0.751636 | Soc_11G00 | 2 |
| milin vs zangga | GO:0003824 | catalytic ac | 5/441 | 178/15848 | 0.554578 | 0.777059 | 0.751636 | Soc_12G00 | 5 |
| milin vs zangga | GO:0005887 | integral co  | 4/441 | 141/15848 | 0.554866 | 0.777059 | 0.751636 | Soc_14G00 | 4 |
| milin vs zangga | GO:0004812 | aminoacyl    | 1/441 | 29/15848  | 0.559195 | 0.777059 | 0.751636 | Soc_6G000 | 1 |
| milin vs zangga | GO:0008233 | peptidase    | 1/441 | 29/15848  | 0.559195 | 0.777059 | 0.751636 | Soc_1G000 | 1 |
| milin vs zangga | GO:0003777 | microtubu    | 2/441 | 67/15848  | 0.560094 | 0.777059 | 0.751636 | Soc_1G000 | 2 |
| milin vs zangga | GO:0051015 | actin filam  | 2/441 | 67/15848  | 0.560094 | 0.777059 | 0.751636 | Soc_11G00 | 2 |
| milin vs zangga | GO:0003779 | actin bind   | 3/441 | 105/15848 | 0.562752 | 0.777059 | 0.751636 | Soc_20G00 | 3 |
| milin vs zangga | GO:0004842 | ubiquitin-   | 3/441 | 105/15848 | 0.562752 | 0.777059 | 0.751636 | Soc_1G000 | 3 |
| milin vs zangga | GO:0016791 | phosphata    | 3/441 | 106/15848 | 0.569204 | 0.777059 | 0.751636 | Soc_11G00 | 3 |
| milin vs zangga | GO:0005578 | extracellul  | 1/441 | 30/15848  | 0.571484 | 0.777059 | 0.751636 | Soc_17G00 | 1 |
| milin vs zangga | GO:0009190 | cyclic nucl  | 1/441 | 30/15848  | 0.571484 | 0.777059 | 0.751636 | Soc_13G00 | 1 |
| milin vs zangga | GO:0016849 | phosphori    | 1/441 | 30/15848  | 0.571484 | 0.777059 | 0.751636 | Soc_13G00 | 1 |
| milin vs zangga | GO:0019001 | guanyl nuc   | 1/441 | 30/15848  | 0.571484 | 0.777059 | 0.751636 | Soc_9G000 | 1 |
| milin vs zangga | GO:0031683 | G-protein    | 1/441 | 30/15848  | 0.571484 | 0.777059 | 0.751636 | Soc_9G000 | 1 |
| milin vs zangga | GO:0008083 | growth fac   | 3/441 | 108/15848 | 0.58193  | 0.777059 | 0.751636 | Soc_21G00 | 3 |
| milin vs zangga | GO:0006897 | endocytos    | 1/441 | 31/15848  | 0.583431 | 0.777059 | 0.751636 | Soc_5G000 | 1 |
| milin vs zangga | GO:0016746 | transferase  | 1/441 | 31/15848  | 0.583431 | 0.777059 | 0.751636 | Soc_11G00 | 1 |
| milin vs zangga | GO:0071805 | potassium    | 1/441 | 31/15848  | 0.583431 | 0.777059 | 0.751636 | Soc_14G00 | 1 |
| milin vs zangga | GO:0016459 | myosin co    | 2/441 | 70/15848  | 0.583992 | 0.777059 | 0.751636 | Soc_21G00 | 2 |
| milin vs zangga | GO:0003774 | motor acti   | 2/441 | 71/15848  | 0.591742 | 0.777059 | 0.751636 | Soc_21G00 | 2 |
| milin vs zangga | GO:0007017 | microtubu    | 1/441 | 32/15848  | 0.595045 | 0.777059 | 0.751636 | Soc_1G001 | 1 |
| milin vs zangga | GO:0008092 | cytoskelet   | 1/441 | 32/15848  | 0.595045 | 0.777059 | 0.751636 | Soc_15G00 | 1 |
| milin vs zangga | GO:0042157 | lipoproteir  | 1/441 | 32/15848  | 0.595045 | 0.777059 | 0.751636 | Soc_3G001 | 1 |
| milin vs zangga | GO:0016616 | oxidoredu    | 1/441 | 33/15848  | 0.606337 | 0.787174 | 0.76142  | Soc_15G00 | 1 |

|                 |            |             |       |           |          |          |          |           |   |
|-----------------|------------|-------------|-------|-----------|----------|----------|----------|-----------|---|
| milin vs zangga | GO:0042981 | regulation  | 2/441 | 77/15848  | 0.635979 | 0.819168 | 0.792368 | Soc_11G00 | 2 |
| milin vs zangga | GO:0008305 | integrin co | 1/441 | 36/15848  | 0.638361 | 0.819168 | 0.792368 | Soc_6G000 | 1 |
| milin vs zangga | GO:0005249 | voltage-ga  | 2/441 | 79/15848  | 0.649866 | 0.82914  | 0.802013 | Soc_14G00 | 2 |
| milin vs zangga | GO:0006260 | DNA repli   | 1/441 | 39/15848  | 0.667785 | 0.847133 | 0.819418 | Soc_1G001 | 1 |
| milin vs zangga | GO:0006812 | cation traf | 1/441 | 40/15848  | 0.677052 | 0.854009 | 0.826069 | Soc_3G000 | 1 |
| milin vs zangga | GO:0003743 | translation | 1/441 | 41/15848  | 0.686062 | 0.85711  | 0.829068 | Soc_12G00 | 1 |
| milin vs zangga | GO:0051082 | unfolded p  | 1/441 | 42/15848  | 0.69482  | 0.85711  | 0.829068 | Soc_15G00 | 1 |
| milin vs zangga | GO:0007166 | cell surfac | 2/441 | 86/15848  | 0.695167 | 0.85711  | 0.829068 | Soc_13G00 | 2 |
| milin vs zangga | GO:0035556 | intracellul | 4/441 | 170/15848 | 0.700345 | 0.85711  | 0.829068 | Soc_13G00 | 4 |
| milin vs zangga | GO:0005882 | intermedia  | 2/441 | 87/15848  | 0.701228 | 0.85711  | 0.829068 | Soc_6G000 | 2 |
| milin vs zangga | GO:0000166 | nucleotide  | 1/441 | 43/15848  | 0.703335 | 0.85711  | 0.829068 | Soc_6G000 | 1 |
| milin vs zangga | GO:0022857 | transmem    | 2/441 | 88/15848  | 0.707189 | 0.85711  | 0.829068 | Soc_18G00 | 2 |
| milin vs zangga | GO:0007156 | homophilic  | 3/441 | 131/15848 | 0.710397 | 0.85711  | 0.829068 | Soc_15G00 | 3 |
| milin vs zangga | GO:0005874 | microtubu   | 1/441 | 45/15848  | 0.71966  | 0.863592 | 0.835338 | Soc_1G001 | 1 |
| milin vs zangga | GO:0042626 | ATPase-co   | 1/441 | 46/15848  | 0.727483 | 0.868287 | 0.839879 | Soc_19G00 | 1 |
| milin vs zangga | GO:0006869 | lipid trans | 1/441 | 47/15848  | 0.735089 | 0.872672 | 0.844121 | Soc_3G001 | 1 |
| milin vs zangga | GO:0015074 | DNA integ   | 2/441 | 94/15848  | 0.740897 | 0.874889 | 0.846265 | Soc_12G00 | 2 |
| milin vs zangga | GO:0008017 | microtubu   | 2/441 | 96/15848  | 0.751373 | 0.882565 | 0.85369  | Soc_13G00 | 2 |
| milin vs zangga | GO:0036459 | thiol-depe  | 1/441 | 52/15848  | 0.770054 | 0.897798 | 0.868425 | Soc_8G000 | 1 |
| milin vs zangga | GO:0004984 | olfactory r | 1/441 | 53/15848  | 0.776474 | 0.897798 | 0.868425 | Soc_16G00 | 1 |
| milin vs zangga | GO:0035091 | phosphati   | 1/441 | 53/15848  | 0.776474 | 0.897798 | 0.868425 | Soc_9G000 | 1 |
| milin vs zangga | GO:0007155 | cell adhes  | 3/441 | 149/15848 | 0.788019 | 0.906427 | 0.876771 | Soc_15G00 | 3 |
| milin vs zangga | GO:0005739 | mitochond   | 1/441 | 57/15848  | 0.800413 | 0.915937 | 0.88597  | Soc_8G000 | 1 |
| milin vs zangga | GO:0008138 | protein tyr | 1/441 | 58/15848  | 0.805987 | 0.917586 | 0.887565 | Soc_11G00 | 1 |
| milin vs zangga | GO:0004674 | protein se  | 2/441 | 110/15848 | 0.814939 | 0.920312 | 0.890202 | Soc_17G00 | 2 |
| milin vs zangga | GO:0006915 | apoptotic   | 1/441 | 60/15848  | 0.816673 | 0.920312 | 0.890202 | Soc_8G000 | 1 |
| milin vs zangga | GO:0008076 | voltage-ga  | 1/441 | 61/15848  | 0.821794 | 0.921406 | 0.89126  | Soc_20G00 | 1 |
| milin vs zangga | GO:0016055 | Wnt signa   | 1/441 | 62/15848  | 0.826772 | 0.922329 | 0.892153 | Soc_15G00 | 1 |
| milin vs zangga | GO:0016567 | protein ub  | 1/441 | 64/15848  | 0.836316 | 0.928311 | 0.897939 | Soc_17G00 | 1 |
| milin vs zangga | GO:0008237 | metallope   | 1/441 | 69/15848  | 0.857942 | 0.941606 | 0.910799 | Soc_10G00 | 1 |
| milin vs zangga | GO:0051260 | protein ho  | 1/441 | 69/15848  | 0.857942 | 0.941606 | 0.910799 | Soc_20G00 | 1 |
| milin vs zangga | GO:0007165 | signal tran | 7/441 | 351/15848 | 0.861018 | 0.941606 | 0.910799 | Soc_10G00 | 7 |
| milin vs zangga | GO:0016491 | oxidoredu   | 3/441 | 179/15848 | 0.878716 | 0.956249 | 0.924964 | Soc_10G00 | 3 |
| milin vs zangga | GO:0004871 | obsolete s  | 1/441 | 78/15848  | 0.889938 | 0.963737 | 0.932207 | Soc_9G000 | 1 |
| milin vs zangga | GO:0007275 | multicellul | 1/441 | 80/15848  | 0.896007 | 0.965059 | 0.933485 | Soc_15G00 | 1 |
| milin vs zangga | GO:0006508 | proteolysis | 8/441 | 422/15848 | 0.904913 | 0.965059 | 0.933485 | Soc_10G00 | 8 |
| milin vs zangga | GO:0005089 | Rho guan    | 1/441 | 84/15848  | 0.907163 | 0.965059 | 0.933485 | Soc_19G00 | 1 |
| milin vs zangga | GO:0005840 | ribosome    | 1/441 | 87/15848  | 0.914739 | 0.965059 | 0.933485 | Soc_18G00 | 1 |

|                  |            |              |        |           |          |          |          |           |    |
|------------------|------------|--------------|--------|-----------|----------|----------|----------|-----------|----|
| milin vs zangga  | GO:0035023 | regulation   | 1/441  | 88/15848  | 0.917125 | 0.965059 | 0.933485 | Soc_19G00 | 1  |
| milin vs zangga  | GO:0003700 | DNA-bind     | 9/441  | 476/15848 | 0.917241 | 0.965059 | 0.933485 | Soc_11G00 | 9  |
| milin vs zangga  | GO:0006412 | translation  | 1/441  | 91/15848  | 0.923889 | 0.967469 | 0.935817 | Soc_18G00 | 1  |
| milin vs zangga  | GO:0003735 | structural   | 1/441  | 97/15848  | 0.935811 | 0.975352 | 0.943441 | Soc_18G00 | 1  |
| milin vs zangga  | GO:0005975 | carbohydr    | 1/441  | 107/15848 | 0.951683 | 0.984992 | 0.952767 | Soc_15G00 | 1  |
| milin vs zangga  | GO:0004222 | metalloen    | 1/441  | 109/15848 | 0.954353 | 0.984992 | 0.952767 | Soc_10G00 | 1  |
| milin vs zangga  | GO:0005506 | iron ion bi  | 1/441  | 114/15848 | 0.9604   | 0.984992 | 0.952767 | Soc_18G00 | 1  |
| milin vs zangga  | GO:0043565 | sequence-    | 2/441  | 191/15848 | 0.971163 | 0.984992 | 0.952767 | Soc_5G000 | 2  |
| milin vs zangga  | GO:0055114 | oxidation-   | 6/441  | 413/15848 | 0.975061 | 0.984992 | 0.952767 | Soc_10G00 | 6  |
| milin vs zangga  | GO:0016787 | hydrolase    | 1/441  | 134/15848 | 0.977581 | 0.984992 | 0.952767 | Soc_6G000 | 1  |
| milin vs zangga  | GO:0000786 | nucleosom    | 1/441  | 137/15848 | 0.979416 | 0.984992 | 0.952767 | Soc_3G000 | 1  |
| milin vs zangga  | GO:0007264 | small GTPa   | 1/441  | 139/15848 | 0.980556 | 0.984992 | 0.952767 | Soc_10G00 | 1  |
| milin vs zangga  | GO:0005622 | intracellul  | 3/441  | 400/15848 | 0.999119 | 0.999119 | 0.966431 | Soc_10G00 | 3  |
| linzhi vs zangga | GO:0000786 | nucleosom    | 19/457 | 137/15848 | 1.44E-08 | 3.09E-06 | 2.92E-06 | Soc_20G00 | 19 |
| linzhi vs zangga | GO:0004415 | hyalurono    | 4/457  | 10/15848  | 0.000125 | 0.013356 | 0.012613 | Soc_8G000 | 4  |
| linzhi vs zangga | GO:0004866 | endopepti    | 5/457  | 22/15848  | 0.000342 | 0.022425 | 0.021178 | Soc_5G000 | 5  |
| linzhi vs zangga | GO:0006334 | nucleosom    | 7/457  | 48/15848  | 0.000419 | 0.022425 | 0.021178 | Soc_20G00 | 7  |
| linzhi vs zangga | GO:0045095 | keratin fila | 3/457  | 12/15848  | 0.004316 | 0.153928 | 0.145372 | Soc_15G00 | 3  |
| linzhi vs zangga | GO:0046982 | protein he   | 3/457  | 12/15848  | 0.004316 | 0.153928 | 0.145372 | Soc_7G000 | 3  |
| linzhi vs zangga | GO:0022848 | acetylchol   | 4/457  | 25/15848  | 0.005337 | 0.163167 | 0.154098 | Soc_4G000 | 4  |
| linzhi vs zangga | GO:0016311 | dephosph     | 8/457  | 98/15848  | 0.007363 | 0.19696  | 0.186012 | Soc_11G00 | 8  |
| linzhi vs zangga | GO:0045211 | postsynap    | 4/457  | 31/15848  | 0.011592 | 0.275638 | 0.260317 | Soc_4G000 | 4  |
| linzhi vs zangga | GO:0005104 | fibroblast   | 3/457  | 20/15848  | 0.018856 | 0.391477 | 0.369718 | Soc_10G00 | 3  |
| linzhi vs zangga | GO:0006470 | protein de   | 8/457  | 123/15848 | 0.026056 | 0.391477 | 0.369718 | Soc_11G00 | 8  |
| linzhi vs zangga | GO:0008543 | fibroblast   | 3/457  | 23/15848  | 0.027493 | 0.391477 | 0.369718 | Soc_10G00 | 3  |
| linzhi vs zangga | GO:0004177 | aminopep     | 2/457  | 10/15848  | 0.032033 | 0.391477 | 0.369718 | Soc_24G00 | 2  |
| linzhi vs zangga | GO:0004571 | mannosyl-    | 2/457  | 10/15848  | 0.032033 | 0.391477 | 0.369718 | Soc_6G000 | 2  |
| linzhi vs zangga | GO:0005764 | lysosome     | 2/457  | 10/15848  | 0.032033 | 0.391477 | 0.369718 | Soc_11G00 | 2  |
| linzhi vs zangga | GO:0016712 | oxidoredu    | 2/457  | 10/15848  | 0.032033 | 0.391477 | 0.369718 | Soc_21G00 | 2  |
| linzhi vs zangga | GO:0050662 | obsolete c   | 2/457  | 10/15848  | 0.032033 | 0.391477 | 0.369718 | Soc_12G00 | 2  |
| linzhi vs zangga | GO:0016791 | phosphata    | 7/457  | 106/15848 | 0.033662 | 0.391477 | 0.369718 | Soc_11G00 | 7  |
| linzhi vs zangga | GO:0005789 | endoplasm    | 3/457  | 26/15848  | 0.037894 | 0.391477 | 0.369718 | Soc_24G00 | 3  |
| linzhi vs zangga | GO:0007160 | cell-matrix  | 3/457  | 26/15848  | 0.037894 | 0.391477 | 0.369718 | Soc_19G00 | 3  |
| linzhi vs zangga | GO:0007188 | adenylate    | 2/457  | 11/15848  | 0.038416 | 0.391477 | 0.369718 | Soc_8G000 | 2  |
| linzhi vs zangga | GO:0022857 | transmem     | 6/457  | 88/15848  | 0.04163  | 0.404948 | 0.38244  | Soc_12G00 | 6  |
| linzhi vs zangga | GO:0008271 | secondary    | 2/457  | 13/15848  | 0.052462 | 0.440379 | 0.415902 | Soc_15G00 | 2  |
| linzhi vs zangga | GO:0008272 | sulfate tra  | 2/457  | 13/15848  | 0.052462 | 0.440379 | 0.415902 | Soc_15G00 | 2  |
| linzhi vs zangga | GO:0015116 | sulfate tra  | 2/457  | 13/15848  | 0.052462 | 0.440379 | 0.415902 | Soc_15G00 | 2  |

|                  |            |              |        |           |          |          |          |           |    |
|------------------|------------|--------------|--------|-----------|----------|----------|----------|-----------|----|
| linzhi vs zangga | GO:0005230 | extracellul  | 5/457  | 71/15848  | 0.05392  | 0.440379 | 0.415902 | Soc_4G000 | 5  |
| linzhi vs zangga | GO:0004725 | protein tyr  | 4/457  | 50/15848  | 0.055562 | 0.440379 | 0.415902 | Soc_12G00 | 4  |
| linzhi vs zangga | GO:0008168 | methyltran   | 4/457  | 51/15848  | 0.058978 | 0.450758 | 0.425704 | Soc_21G00 | 4  |
| linzhi vs zangga | GO:0008138 | protein tyr  | 4/457  | 58/15848  | 0.085895 | 0.607748 | 0.573967 | Soc_11G00 | 4  |
| linzhi vs zangga | GO:0034220 | ion transm   | 5/457  | 82/15848  | 0.088012 | 0.607748 | 0.573967 | Soc_4G000 | 5  |
| linzhi vs zangga | GO:0005975 | carbohydr    | 6/457  | 107/15848 | 0.089093 | 0.607748 | 0.573967 | Soc_10G00 | 6  |
| linzhi vs zangga | GO:0008083 | growth fac   | 6/457  | 108/15848 | 0.092175 | 0.607748 | 0.573967 | Soc_10G00 | 6  |
| linzhi vs zangga | GO:0061630 | ubiquitin p  | 2/457  | 18/15848  | 0.093718 | 0.607748 | 0.573967 | Soc_11G00 | 2  |
| linzhi vs zangga | GO:0005201 | extracellul  | 2/457  | 19/15848  | 0.102818 | 0.642875 | 0.607142 | Soc_4G000 | 2  |
| linzhi vs zangga | GO:0004888 | transmem     | 8/457  | 165/15848 | 0.105143 | 0.642875 | 0.607142 | Soc_21G00 | 8  |
| linzhi vs zangga | GO:0004114 | 3',5'-cyclic | 2/457  | 20/15848  | 0.112147 | 0.648633 | 0.61258  | Soc_1G002 | 2  |
| linzhi vs zangga | GO:0006954 | inflammat    | 2/457  | 20/15848  | 0.112147 | 0.648633 | 0.61258  | Soc_19G00 | 2  |
| linzhi vs zangga | GO:0007015 | actin filam  | 2/457  | 21/15848  | 0.121685 | 0.673089 | 0.635676 | Soc_18G00 | 2  |
| linzhi vs zangga | GO:0005044 | scavenger    | 4/457  | 66/15848  | 0.122666 | 0.673089 | 0.635676 | Soc_12G00 | 4  |
| linzhi vs zangga | GO:0005856 | cytoskelet   | 5/457  | 93/15848  | 0.130939 | 0.685903 | 0.647779 | Soc_11G00 | 5  |
| linzhi vs zangga | GO:0005794 | Golgi appa   | 2/457  | 22/15848  | 0.131411 | 0.685903 | 0.647779 | Soc_13G00 | 2  |
| linzhi vs zangga | GO:0004129 | cytochrom    | 2/457  | 23/15848  | 0.141308 | 0.72     | 0.67998  | Soc_5G000 | 2  |
| linzhi vs zangga | GO:0004197 | cysteine-t   | 2/457  | 26/15848  | 0.171847 | 0.734299 | 0.693485 | Soc_8G000 | 2  |
| linzhi vs zangga | GO:0009966 | regulation   | 2/457  | 26/15848  | 0.171847 | 0.734299 | 0.693485 | Soc_11G00 | 2  |
| linzhi vs zangga | GO:0009607 | response t   | 2/457  | 27/15848  | 0.182255 | 0.734299 | 0.693485 | Soc_12G00 | 2  |
| linzhi vs zangga | GO:0015078 | proton tra   | 2/457  | 27/15848  | 0.182255 | 0.734299 | 0.693485 | Soc_10G00 | 2  |
| linzhi vs zangga | GO:0015991 | proton tra   | 2/457  | 27/15848  | 0.182255 | 0.734299 | 0.693485 | Soc_10G00 | 2  |
| linzhi vs zangga | GO:0036459 | thiol-depe   | 3/457  | 52/15848  | 0.188932 | 0.734299 | 0.693485 | Soc_11G00 | 3  |
| linzhi vs zangga | GO:0043547 | positive re  | 2/457  | 28/15848  | 0.192752 | 0.734299 | 0.693485 | Soc_2G000 | 2  |
| linzhi vs zangga | GO:0006351 | transcripti  | 3/457  | 53/15848  | 0.196299 | 0.734299 | 0.693485 | Soc_15G00 | 3  |
| linzhi vs zangga | GO:0004812 | aminoacyl    | 2/457  | 29/15848  | 0.203325 | 0.734299 | 0.693485 | Soc_10G00 | 2  |
| linzhi vs zangga | GO:0006096 | glycolytic   | 2/457  | 29/15848  | 0.203325 | 0.734299 | 0.693485 | Soc_9G000 | 2  |
| linzhi vs zangga | GO:0007601 | visual perc  | 3/457  | 54/15848  | 0.203736 | 0.734299 | 0.693485 | Soc_1G002 | 3  |
| linzhi vs zangga | GO:0019001 | guanyl nuc   | 2/457  | 30/15848  | 0.213961 | 0.734299 | 0.693485 | Soc_8G000 | 2  |
| linzhi vs zangga | GO:0031683 | G-protein    | 2/457  | 30/15848  | 0.213961 | 0.734299 | 0.693485 | Soc_8G000 | 2  |
| linzhi vs zangga | GO:0003700 | DNA-bind     | 17/457 | 476/15848 | 0.215124 | 0.734299 | 0.693485 | Soc_10G00 | 17 |
| linzhi vs zangga | GO:0005882 | intermedia   | 4/457  | 87/15848  | 0.242421 | 0.734299 | 0.693485 | Soc_15G00 | 4  |
| linzhi vs zangga | GO:0008289 | lipid bindi  | 4/457  | 88/15848  | 0.248709 | 0.734299 | 0.693485 | Soc_15G00 | 4  |
| linzhi vs zangga | GO:0006915 | apoptotic    | 3/457  | 60/15848  | 0.249536 | 0.734299 | 0.693485 | Soc_11G00 | 3  |
| linzhi vs zangga | GO:0003956 | NAD(P)+p     | 1/457  | 10/15848  | 0.253745 | 0.734299 | 0.693485 | Soc_20G00 | 1  |
| linzhi vs zangga | GO:0004957 | prostaglan   | 1/457  | 10/15848  | 0.253745 | 0.734299 | 0.693485 | Soc_1G001 | 1  |
| linzhi vs zangga | GO:0005741 | mitochond    | 1/457  | 10/15848  | 0.253745 | 0.734299 | 0.693485 | Soc_18G00 | 1  |
| linzhi vs zangga | GO:0050839 | cell adhesi  | 1/457  | 10/15848  | 0.253745 | 0.734299 | 0.693485 | Soc_7G000 | 1  |

|                  |            |              |        |           |          |          |          |           |    |
|------------------|------------|--------------|--------|-----------|----------|----------|----------|-----------|----|
| linzhi vs zangga | GO:0003707 | steroid ho   | 3/457  | 61/15848  | 0.257324 | 0.734299 | 0.693485 | Soc_10G00 | 3  |
| linzhi vs zangga | GO:0043401 | steroid ho   | 3/457  | 61/15848  | 0.257324 | 0.734299 | 0.693485 | Soc_10G00 | 3  |
| linzhi vs zangga | GO:0016579 | protein de   | 3/457  | 63/15848  | 0.272993 | 0.734299 | 0.693485 | Soc_11G00 | 3  |
| linzhi vs zangga | GO:0003725 | double-str   | 1/457  | 11/15848  | 0.275278 | 0.734299 | 0.693485 | Soc_1G00  | 1  |
| linzhi vs zangga | GO:0005212 | structural   | 1/457  | 11/15848  | 0.275278 | 0.734299 | 0.693485 | Soc_21G00 | 1  |
| linzhi vs zangga | GO:0006471 | protein AD   | 1/457  | 11/15848  | 0.275278 | 0.734299 | 0.693485 | Soc_20G00 | 1  |
| linzhi vs zangga | GO:0006888 | endoplasn    | 1/457  | 11/15848  | 0.275278 | 0.734299 | 0.693485 | Soc_7G00  | 1  |
| linzhi vs zangga | GO:0007034 | vacuolar tr  | 1/457  | 11/15848  | 0.275278 | 0.734299 | 0.693485 | Soc_10G00 | 1  |
| linzhi vs zangga | GO:0007224 | smoother     | 1/457  | 11/15848  | 0.275278 | 0.734299 | 0.693485 | Soc_14G00 | 1  |
| linzhi vs zangga | GO:0016773 | phosphotr    | 1/457  | 11/15848  | 0.275278 | 0.734299 | 0.693485 | Soc_22G00 | 1  |
| linzhi vs zangga | GO:0044212 | transcripti  | 1/457  | 11/15848  | 0.275278 | 0.734299 | 0.693485 | Soc_11G00 | 1  |
| linzhi vs zangga | GO:0008373 | sialyltransf | 2/457  | 36/15848  | 0.278443 | 0.734299 | 0.693485 | Soc_24G00 | 2  |
| linzhi vs zangga | GO:0006813 | potassium    | 5/457  | 125/15848 | 0.292976 | 0.734299 | 0.693485 | Soc_11G00 | 5  |
| linzhi vs zangga | GO:0000139 | Golgi mem    | 1/457  | 12/15848  | 0.296191 | 0.734299 | 0.693485 | Soc_12G00 | 1  |
| linzhi vs zangga | GO:0004707 | MAP kinas    | 1/457  | 12/15848  | 0.296191 | 0.734299 | 0.693485 | Soc_15G00 | 1  |
| linzhi vs zangga | GO:0019752 | carboxylic   | 1/457  | 12/15848  | 0.296191 | 0.734299 | 0.693485 | Soc_11G00 | 1  |
| linzhi vs zangga | GO:0030145 | manganes     | 1/457  | 12/15848  | 0.296191 | 0.734299 | 0.693485 | Soc_8G00  | 1  |
| linzhi vs zangga | GO:0043039 | tRNA amir    | 1/457  | 12/15848  | 0.296191 | 0.734299 | 0.693485 | Soc_1G00  | 1  |
| linzhi vs zangga | GO:0043066 | negative re  | 1/457  | 12/15848  | 0.296191 | 0.734299 | 0.693485 | Soc_8G00  | 1  |
| linzhi vs zangga | GO:0008017 | microtubu    | 4/457  | 96/15848  | 0.300064 | 0.734299 | 0.693485 | Soc_20G00 | 4  |
| linzhi vs zangga | GO:0006357 | regulation   | 4/457  | 97/15848  | 0.306582 | 0.734299 | 0.693485 | Soc_13G00 | 4  |
| linzhi vs zangga | GO:0043565 | sequence-    | 7/457  | 191/15848 | 0.313525 | 0.734299 | 0.693485 | Soc_10G00 | 7  |
| linzhi vs zangga | GO:0005911 | cell-cell ju | 1/457  | 13/15848  | 0.316502 | 0.734299 | 0.693485 | Soc_7G00  | 1  |
| linzhi vs zangga | GO:0007049 | cell cycle   | 2/457  | 40/15848  | 0.321348 | 0.734299 | 0.693485 | Soc_1G00  | 2  |
| linzhi vs zangga | GO:0007156 | homophilic   | 5/457  | 131/15848 | 0.326943 | 0.734299 | 0.693485 | Soc_10G00 | 5  |
| linzhi vs zangga | GO:0005216 | ion channe   | 9/457  | 258/15848 | 0.327969 | 0.734299 | 0.693485 | Soc_11G00 | 9  |
| linzhi vs zangga | GO:0016459 | myosin co    | 3/457  | 70/15848  | 0.328393 | 0.734299 | 0.693485 | Soc_10G00 | 3  |
| linzhi vs zangga | GO:0003743 | translation  | 2/457  | 41/15848  | 0.331989 | 0.734299 | 0.693485 | Soc_10G00 | 2  |
| linzhi vs zangga | GO:0006508 | proteolysis  | 14/457 | 422/15848 | 0.333833 | 0.734299 | 0.693485 | Soc_17G00 | 14 |
| linzhi vs zangga | GO:0003712 | transcripti  | 1/457  | 14/15848  | 0.336228 | 0.734299 | 0.693485 | Soc_21G00 | 1  |
| linzhi vs zangga | GO:0016477 | cell migrat  | 1/457  | 14/15848  | 0.336228 | 0.734299 | 0.693485 | Soc_15G00 | 1  |
| linzhi vs zangga | GO:0060271 | cilium asse  | 1/457  | 14/15848  | 0.336228 | 0.734299 | 0.693485 | Soc_6G00  | 1  |
| linzhi vs zangga | GO:0003774 | motor acti   | 3/457  | 71/15848  | 0.336329 | 0.734299 | 0.693485 | Soc_10G00 | 3  |
| linzhi vs zangga | GO:0016887 | ATPase ac    | 3/457  | 71/15848  | 0.336329 | 0.734299 | 0.693485 | Soc_15G00 | 3  |
| linzhi vs zangga | GO:0004869 | cysteine-t   | 1/457  | 15/15848  | 0.355385 | 0.734299 | 0.693485 | Soc_5G00  | 1  |
| linzhi vs zangga | GO:0005813 | centrosom    | 1/457  | 15/15848  | 0.355385 | 0.734299 | 0.693485 | Soc_17G00 | 1  |
| linzhi vs zangga | GO:0006364 | rRNA prod    | 1/457  | 15/15848  | 0.355385 | 0.734299 | 0.693485 | Soc_5G00  | 1  |
| linzhi vs zangga | GO:0008033 | tRNA prod    | 1/457  | 15/15848  | 0.355385 | 0.734299 | 0.693485 | Soc_24G00 | 1  |

|                  |            |             |        |           |          |          |          |           |    |
|------------------|------------|-------------|--------|-----------|----------|----------|----------|-----------|----|
| linzhi vs zangga | GO:0019905 | syntaxin b  | 1/457  | 15/15848  | 0.355385 | 0.734299 | 0.693485 | Soc_12G00 | 1  |
| linzhi vs zangga | GO:0033179 | proton-tra  | 1/457  | 15/15848  | 0.355385 | 0.734299 | 0.693485 | Soc_10G00 | 1  |
| linzhi vs zangga | GO:0016705 | oxidoredu   | 3/457  | 74/15848  | 0.360094 | 0.734299 | 0.693485 | Soc_21G00 | 3  |
| linzhi vs zangga | GO:0016758 | transferase | 2/457  | 44/15848  | 0.363598 | 0.734299 | 0.693485 | Soc_21G00 | 2  |
| linzhi vs zangga | GO:0005622 | intracellul | 13/457 | 400/15848 | 0.369446 | 0.734299 | 0.693485 | Soc_11G00 | 13 |
| linzhi vs zangga | GO:0007596 | blood coag  | 1/457  | 16/15848  | 0.373991 | 0.734299 | 0.693485 | Soc_20G00 | 1  |
| linzhi vs zangga | GO:0042803 | protein ho  | 1/457  | 16/15848  | 0.373991 | 0.734299 | 0.693485 | Soc_7G000 | 1  |
| linzhi vs zangga | GO:0030036 | actin cytos | 2/457  | 45/15848  | 0.374012 | 0.734299 | 0.693485 | Soc_15G00 | 2  |
| linzhi vs zangga | GO:0004879 | nuclear rec | 1/457  | 17/15848  | 0.392062 | 0.749203 | 0.70756  | Soc_11G00 | 1  |
| linzhi vs zangga | GO:0006820 | anion tran  | 1/457  | 17/15848  | 0.392062 | 0.749203 | 0.70756  | Soc_18G00 | 1  |
| linzhi vs zangga | GO:0016757 | transferase | 2/457  | 47/15848  | 0.394625 | 0.749203 | 0.70756  | Soc_15G00 | 2  |
| linzhi vs zangga | GO:0004252 | serine-tyr  | 5/457  | 143/15848 | 0.395723 | 0.749203 | 0.70756  | Soc_17G00 | 5  |
| linzhi vs zangga | GO:0046872 | metal ion   | 7/457  | 210/15848 | 0.402783 | 0.749203 | 0.70756  | Soc_10G00 | 7  |
| linzhi vs zangga | GO:0031012 | extracellul | 2/457  | 48/15848  | 0.404815 | 0.749203 | 0.70756  | Soc_19G00 | 2  |
| linzhi vs zangga | GO:0003684 | damaged     | 1/457  | 18/15848  | 0.409611 | 0.749203 | 0.70756  | Soc_5G000 | 1  |
| linzhi vs zangga | GO:0004190 | aspartic-ty | 1/457  | 18/15848  | 0.409611 | 0.749203 | 0.70756  | Soc_3G000 | 1  |
| linzhi vs zangga | GO:0004497 | monooxyg    | 1/457  | 19/15848  | 0.426655 | 0.752564 | 0.710734 | Soc_4G000 | 1  |
| linzhi vs zangga | GO:0016627 | oxidoredu   | 1/457  | 19/15848  | 0.426655 | 0.752564 | 0.710734 | Soc_1G000 | 1  |
| linzhi vs zangga | GO:0006811 | ion transp  | 9/457  | 285/15848 | 0.438585 | 0.752564 | 0.710734 | Soc_11G00 | 9  |
| linzhi vs zangga | GO:0005507 | copper ion  | 1/457  | 20/15848  | 0.443208 | 0.752564 | 0.710734 | Soc_22G00 | 1  |
| linzhi vs zangga | GO:0006352 | DNA-templ   | 1/457  | 20/15848  | 0.443208 | 0.752564 | 0.710734 | Soc_9G000 | 1  |
| linzhi vs zangga | GO:0006413 | translation | 1/457  | 20/15848  | 0.443208 | 0.752564 | 0.710734 | Soc_10G00 | 1  |
| linzhi vs zangga | GO:0008234 | cysteine-ty | 2/457  | 52/15848  | 0.444712 | 0.752564 | 0.710734 | Soc_24G00 | 2  |
| linzhi vs zangga | GO:0007166 | cell surfac | 3/457  | 86/15848  | 0.453155 | 0.752564 | 0.710734 | Soc_21G00 | 3  |
| linzhi vs zangga | GO:0035091 | phosphatid  | 2/457  | 53/15848  | 0.454454 | 0.752564 | 0.710734 | Soc_11G00 | 2  |
| linzhi vs zangga | GO:0005242 | inward rec  | 1/457  | 21/15848  | 0.459284 | 0.752564 | 0.710734 | Soc_6G000 | 1  |
| linzhi vs zangga | GO:0005540 | hyaluronic  | 1/457  | 21/15848  | 0.459284 | 0.752564 | 0.710734 | Soc_7G000 | 1  |
| linzhi vs zangga | GO:0006914 | autophagy   | 1/457  | 21/15848  | 0.459284 | 0.752564 | 0.710734 | Soc_8G000 | 1  |
| linzhi vs zangga | GO:0045893 | positive re | 1/457  | 21/15848  | 0.459284 | 0.752564 | 0.710734 | Soc_8G000 | 1  |
| linzhi vs zangga | GO:0006486 | protein gly | 3/457  | 87/15848  | 0.460681 | 0.752564 | 0.710734 | Soc_10G00 | 3  |
| linzhi vs zangga | GO:0003899 | DNA-direc   | 1/457  | 22/15848  | 0.474897 | 0.758418 | 0.716263 | Soc_6G000 | 1  |
| linzhi vs zangga | GO:0006418 | tRNA amin   | 1/457  | 22/15848  | 0.474897 | 0.758418 | 0.716263 | Soc_10G00 | 1  |
| linzhi vs zangga | GO:0045892 | negative re | 1/457  | 22/15848  | 0.474897 | 0.758418 | 0.716263 | Soc_8G000 | 1  |
| linzhi vs zangga | GO:0030001 | metal ion   | 1/457  | 23/15848  | 0.490061 | 0.771535 | 0.728651 | Soc_10G00 | 1  |
| linzhi vs zangga | GO:0020037 | heme bind   | 3/457  | 91/15848  | 0.490321 | 0.771535 | 0.728651 | Soc_21G00 | 3  |
| linzhi vs zangga | GO:0008378 | galactosyl  | 1/457  | 24/15848  | 0.504787 | 0.782785 | 0.739276 | Soc_10G00 | 1  |
| linzhi vs zangga | GO:0050660 | flavin ader | 1/457  | 24/15848  | 0.504787 | 0.782785 | 0.739276 | Soc_1G000 | 1  |
| linzhi vs zangga | GO:0003713 | transcripti | 1/457  | 25/15848  | 0.519089 | 0.787837 | 0.744046 | Soc_9G000 | 1  |



|                  |            |                                             |        |           |          |          |          |           |    |
|------------------|------------|---------------------------------------------|--------|-----------|----------|----------|----------|-----------|----|
| linzhi vs zangga | GO:0007010 | cytoskeleton                                | 1/457  | 25/15848  | 0.519089 | 0.787837 | 0.744046 | Soc_15G00 | 1  |
| linzhi vs zangga | GO:0008081 | phosphorylation                             | 1/457  | 25/15848  | 0.519089 | 0.787837 | 0.744046 | Soc_7G000 | 1  |
| linzhi vs zangga | GO:0005200 | structural constituent of ribosome          | 1/457  | 27/15848  | 0.546468 | 0.798016 | 0.75366  | Soc_1G000 | 1  |
| linzhi vs zangga | GO:0005328 | neurotransmission                           | 1/457  | 27/15848  | 0.546468 | 0.798016 | 0.75366  | Soc_13G00 | 1  |
| linzhi vs zangga | GO:0003950 | NAD ADP-ribosylation                        | 1/457  | 28/15848  | 0.559568 | 0.798016 | 0.75366  | Soc_11G00 | 1  |
| linzhi vs zangga | GO:0008285 | negative regulation of cell growth          | 1/457  | 28/15848  | 0.559568 | 0.798016 | 0.75366  | Soc_11G00 | 1  |
| linzhi vs zangga | GO:0007018 | microtubule cytoskeleton organization       | 2/457  | 66/15848  | 0.571437 | 0.798016 | 0.75366  | Soc_20G00 | 2  |
| linzhi vs zangga | GO:0005234 | extracellular matrix organization           | 1/457  | 29/15848  | 0.572291 | 0.798016 | 0.75366  | Soc_10G00 | 1  |
| linzhi vs zangga | GO:0006397 | mRNA processing                             | 1/457  | 29/15848  | 0.572291 | 0.798016 | 0.75366  | Soc_5G000 | 1  |
| linzhi vs zangga | GO:0003777 | microtubule cytoskeleton                    | 2/457  | 67/15848  | 0.579648 | 0.798016 | 0.75366  | Soc_20G00 | 2  |
| linzhi vs zangga | GO:0005887 | integral component of membrane              | 4/457  | 141/15848 | 0.583208 | 0.798016 | 0.75366  | Soc_14G00 | 4  |
| linzhi vs zangga | GO:0005578 | extracellular matrix                        | 1/457  | 30/15848  | 0.584647 | 0.798016 | 0.75366  | Soc_17G00 | 1  |
| linzhi vs zangga | GO:0006464 | cellular process                            | 1/457  | 30/15848  | 0.584647 | 0.798016 | 0.75366  | Soc_8G000 | 1  |
| linzhi vs zangga | GO:0030246 | carbohydrate metabolic process              | 1/457  | 30/15848  | 0.584647 | 0.798016 | 0.75366  | Soc_1G000 | 1  |
| linzhi vs zangga | GO:0003824 | catalytic activity                          | 5/457  | 178/15848 | 0.586419 | 0.798016 | 0.75366  | Soc_12G00 | 5  |
| linzhi vs zangga | GO:0004842 | ubiquitin-mediated proteolysis              | 3/457  | 105/15848 | 0.587103 | 0.798016 | 0.75366  | Soc_11G00 | 3  |
| linzhi vs zangga | GO:0008237 | metalloproteinase activity                  | 2/457  | 69/15848  | 0.595721 | 0.798016 | 0.75366  | Soc_19G00 | 2  |
| linzhi vs zangga | GO:0005245 | voltage-gated ion channel activity          | 1/457  | 31/15848  | 0.596647 | 0.798016 | 0.75366  | Soc_11G00 | 1  |
| linzhi vs zangga | GO:0006897 | endocytosis                                 | 1/457  | 31/15848  | 0.596647 | 0.798016 | 0.75366  | Soc_11G00 | 1  |
| linzhi vs zangga | GO:0016702 | oxidoreductase activity                     | 1/457  | 31/15848  | 0.596647 | 0.798016 | 0.75366  | Soc_1G000 | 1  |
| linzhi vs zangga | GO:0071805 | potassium ion transport                     | 1/457  | 31/15848  | 0.596647 | 0.798016 | 0.75366  | Soc_14G00 | 1  |
| linzhi vs zangga | GO:0007017 | microtubule cytoskeleton                    | 1/457  | 32/15848  | 0.608302 | 0.798629 | 0.754239 | Soc_1G000 | 1  |
| linzhi vs zangga | GO:0008092 | cytoskeleton                                | 1/457  | 32/15848  | 0.608302 | 0.798629 | 0.754239 | Soc_6G000 | 1  |
| linzhi vs zangga | GO:0042157 | lipoprotein transport                       | 1/457  | 32/15848  | 0.608302 | 0.798629 | 0.754239 | Soc_1G000 | 1  |
| linzhi vs zangga | GO:0004674 | protein secretion                           | 3/457  | 110/15848 | 0.618693 | 0.798787 | 0.754388 | Soc_5G000 | 3  |
| linzhi vs zangga | GO:0004970 | ionotropic receptor activity                | 1/457  | 33/15848  | 0.61962  | 0.798787 | 0.754388 | Soc_10G00 | 1  |
| linzhi vs zangga | GO:0016616 | oxidoreductase activity                     | 1/457  | 33/15848  | 0.61962  | 0.798787 | 0.754388 | Soc_20G00 | 1  |
| linzhi vs zangga | GO:0005891 | voltage-gated ion channel activity          | 1/457  | 34/15848  | 0.630611 | 0.806091 | 0.761286 | Soc_11G00 | 1  |
| linzhi vs zangga | GO:0005506 | iron ion binding                            | 3/457  | 114/15848 | 0.642759 | 0.806091 | 0.761286 | Soc_21G00 | 3  |
| linzhi vs zangga | GO:0006886 | intracellular transport                     | 3/457  | 115/15848 | 0.648606 | 0.806091 | 0.761286 | Soc_13G00 | 3  |
| linzhi vs zangga | GO:0055114 | oxidation-reduction process                 | 11/457 | 413/15848 | 0.648868 | 0.806091 | 0.761286 | Soc_1G000 | 11 |
| linzhi vs zangga | GO:0006836 | neurotransmission                           | 1/457  | 36/15848  | 0.651653 | 0.806091 | 0.761286 | Soc_13G00 | 1  |
| linzhi vs zangga | GO:0008305 | integrin cell-cell adhesion                 | 1/457  | 36/15848  | 0.651653 | 0.806091 | 0.761286 | Soc_1G000 | 1  |
| linzhi vs zangga | GO:0015031 | protein transport                           | 1/457  | 36/15848  | 0.651653 | 0.806091 | 0.761286 | Soc_24G00 | 1  |
| linzhi vs zangga | GO:0007399 | nervous system development                  | 1/457  | 37/15848  | 0.661721 | 0.809933 | 0.764915 | Soc_21G00 | 1  |
| linzhi vs zangga | GO:0004871 | obsolete structural constituent of ribosome | 2/457  | 78/15848  | 0.662328 | 0.809933 | 0.764915 | Soc_8G000 | 2  |
| linzhi vs zangga | GO:0005249 | voltage-gated ion channel activity          | 2/457  | 79/15848  | 0.669158 | 0.813636 | 0.768411 | Soc_14G00 | 2  |
| linzhi vs zangga | GO:0005783 | endoplasmic reticulum                       | 1/457  | 39/15848  | 0.680994 | 0.823349 | 0.777585 | Soc_13G00 | 1  |

|                  |            |             |       |           |          |          |          |           |   |
|------------------|------------|-------------|-------|-----------|----------|----------|----------|-----------|---|
| linzhi vs zangga | GO:0005737 | cytoplasm   | 6/457 | 238/15848 | 0.686947 | 0.82588  | 0.779975 | Soc_11G00 | 6 |
| linzhi vs zangga | GO:0003723 | RNA bindi   | 5/457 | 202/15848 | 0.696265 | 0.829567 | 0.783457 | Soc_10G00 | 5 |
| linzhi vs zangga | GO:0030170 | pyridoxal p | 1/457 | 41/15848  | 0.699171 | 0.829567 | 0.783457 | Soc_11G00 | 1 |
| linzhi vs zangga | GO:0005089 | Rho guany   | 2/457 | 84/15848  | 0.701643 | 0.829567 | 0.783457 | Soc_15G00 | 2 |
| linzhi vs zangga | GO:0000166 | nucleotide  | 1/457 | 43/15848  | 0.716315 | 0.842261 | 0.795445 | Soc_10G00 | 1 |
| linzhi vs zangga | GO:0035023 | regulation  | 2/457 | 88/15848  | 0.725687 | 0.848617 | 0.801449 | Soc_15G00 | 2 |
| linzhi vs zangga | GO:0005874 | microtubu   | 1/457 | 45/15848  | 0.732484 | 0.851911 | 0.804559 | Soc_1G00  | 1 |
| linzhi vs zangga | GO:0006869 | lipid trans | 1/457 | 47/15848  | 0.747733 | 0.864945 | 0.816869 | Soc_1G00  | 1 |
| linzhi vs zangga | GO:0015074 | DNA integ   | 2/457 | 94/15848  | 0.758666 | 0.87209  | 0.823617 | Soc_10G00 | 2 |
| linzhi vs zangga | GO:0016491 | oxidoredu   | 4/457 | 179/15848 | 0.762696 | 0.87209  | 0.823617 | Soc_21G00 | 4 |
| linzhi vs zangga | GO:0009058 | biosynthes  | 1/457 | 50/15848  | 0.768996 | 0.87209  | 0.823617 | Soc_4G00  | 1 |
| linzhi vs zangga | GO:0005198 | structural  | 4/457 | 181/15848 | 0.77021  | 0.87209  | 0.823617 | Soc_15G00 | 4 |
| linzhi vs zangga | GO:0005102 | signaling r | 1/457 | 52/15848  | 0.782168 | 0.880196 | 0.831273 | Soc_21G00 | 1 |
| linzhi vs zangga | GO:0005576 | extracellul | 7/457 | 311/15848 | 0.796983 | 0.880196 | 0.831273 | Soc_10G00 | 7 |
| linzhi vs zangga | GO:0007165 | signal tran | 8/457 | 351/15848 | 0.797509 | 0.880196 | 0.831273 | Soc_11G00 | 8 |
| linzhi vs zangga | GO:0070588 | calcium io  | 1/457 | 55/15848  | 0.800534 | 0.880196 | 0.831273 | Soc_11G00 | 1 |
| linzhi vs zangga | GO:0006396 | RNA proce   | 1/457 | 56/15848  | 0.806306 | 0.880196 | 0.831273 | Soc_18G00 | 1 |
| linzhi vs zangga | GO:0016301 | kinase acti | 1/457 | 56/15848  | 0.806306 | 0.880196 | 0.831273 | Soc_3G00  | 1 |
| linzhi vs zangga | GO:0007155 | cell adhesi | 3/457 | 149/15848 | 0.807778 | 0.880196 | 0.831273 | Soc_1G00  | 3 |
| linzhi vs zangga | GO:0003779 | actin bindi | 2/457 | 105/15848 | 0.810274 | 0.880196 | 0.831273 | Soc_15G00 | 2 |
| linzhi vs zangga | GO:0005085 | guanyl-nu   | 1/457 | 58/15848  | 0.817354 | 0.883403 | 0.834301 | Soc_5G00  | 1 |
| linzhi vs zangga | GO:0004222 | metalloenc  | 2/457 | 109/15848 | 0.826459 | 0.888755 | 0.839355 | Soc_19G00 | 2 |
| linzhi vs zangga | GO:0008076 | voltage-ga  | 1/457 | 61/15848  | 0.832759 | 0.891052 | 0.841525 | Soc_8G00  | 1 |
| linzhi vs zangga | GO:0016567 | protein ub  | 1/457 | 64/15848  | 0.846868 | 0.90164  | 0.851524 | Soc_11G00 | 1 |
| linzhi vs zangga | GO:0008146 | sulfotransf | 1/457 | 66/15848  | 0.855607 | 0.906378 | 0.855998 | Soc_11G00 | 1 |
| linzhi vs zangga | GO:0051015 | actin filam | 1/457 | 67/15848  | 0.859788 | 0.906378 | 0.855998 | Soc_1G00  | 1 |
| linzhi vs zangga | GO:0051260 | protein ho  | 1/457 | 69/15848  | 0.867791 | 0.91033  | 0.859732 | Soc_8G00  | 1 |
| linzhi vs zangga | GO:0005179 | hormone s   | 1/457 | 72/15848  | 0.87895  | 0.917538 | 0.866539 | Soc_13G00 | 1 |
| linzhi vs zangga | GO:0008152 | metabolic   | 4/457 | 226/15848 | 0.894487 | 0.929225 | 0.877576 | Soc_20G00 | 4 |
| linzhi vs zangga | GO:0016787 | hydrolase   | 2/457 | 134/15848 | 0.90227  | 0.930409 | 0.878694 | Soc_11G00 | 2 |
| linzhi vs zangga | GO:0007275 | multicellul | 1/457 | 80/15848  | 0.904322 | 0.930409 | 0.878694 | Soc_11G00 | 1 |
| linzhi vs zangga | GO:0016192 | vesicle-me  | 1/457 | 82/15848  | 0.909788 | 0.930531 | 0.87881  | Soc_12G00 | 1 |
| linzhi vs zangga | GO:0007264 | small GTPa  | 2/457 | 139/15848 | 0.913138 | 0.930531 | 0.87881  | Soc_24G00 | 2 |
| linzhi vs zangga | GO:0005096 | GTPase ac   | 1/457 | 88/15848  | 0.924386 | 0.933107 | 0.881242 | Soc_2G00  | 1 |
| linzhi vs zangga | GO:0006281 | DNA repair  | 1/457 | 88/15848  | 0.924386 | 0.933107 | 0.881242 | Soc_13G00 | 1 |
| linzhi vs zangga | GO:0003924 | GTPase ac   | 5/457 | 314/15848 | 0.950834 | 0.955298 | 0.9022   | Soc_13G00 | 5 |
| linzhi vs zangga | GO:0046983 | protein dir | 3/457 | 236/15848 | 0.968357 | 0.968357 | 0.914533 | Soc_15G00 | 3 |
